# Supplementary material for: Touch-Induced Transcriptional Changes in Flower Buds of a Non-Model Horticultural Plant Dianthus hybrida
Source: MDPI journal article supplement (doi:10.3390/horticulturae8100918), 2022-10-07
Supplement: s1 [file s1]

Supplementary Table S1. Mapping of RNA-seq reads to carnation scaffold sequences

| Sample         | Input | Unique            | Multiple         | Unmapped         |
|----------------|-------|-------------------|------------------|------------------|
| untouched rep1 | 21.2  | 15.24<br>(71.9%)  | 3.26<br>(15.36%) | 2.7<br>(12.75%)  |
| untouched rep2 | 23.3  | 16.56<br>(71.1%)  | 3.61<br>(15.49%) | 3.13<br>(13.41%) |
| untouched rep3 | 21.08 | 14.98<br>(71.09%) | 3.23<br>(15.32%) | 2.86<br>(13.59%) |
| touched rep1   | 21.58 | 15.48<br>(71.74%) | 3.33<br>(15.42%) | 2.77<br>(12.84%) |
| touched rep2   | 24.73 | 17.66<br>(71.41%) | 3.81<br>(15.39%) | 3.27<br>(13.2%)  |
| touched rep3   | 24.84 | 17.85<br>(71.85%) | 3.84<br>(15.47%) | 3.15<br>(12.68%) |

Numbers indicate million reads, and ratio to input reads are shown in parenthesis.
