# Supplementary material for: Touch-Induced Transcriptional Changes in Flower Buds of a Non-Model Horticultural Plant Dianthus hybrida
Source: MDPI journal article supplement (doi:10.3390/horticulturae8100918), 2022-10-07
Supplement: s1 [file s1]

Archive with 2 entries (2 files):
- horticulturae-1934752-supplementary.xlsx
- horticulturae-1934752_Supplementary_Table.pdf
