# Supplementary material for: Touch-Induced Transcriptional Changes in Flower Buds of a Non-Model Horticultural Plant Dianthus hybrida
Source: MDPI journal article supplement (doi:10.3390/horticulturae8100918), 2022-10-07
Supplement: s1 [file s1 › horticulturae-1934752-supplementary.xlsx]

## Sheet: DEGs
Dca	ut_rep1	ut_rep2	ut_rep3	t_rep1	t_rep2	t_rep3	logFC	logCPM	PValue	FDR	BLASTp_hit	annotation	GO
Dca1864	0	0	0.0810183	8.34226	33.066	20.2962	9.1759	3.39184	3.36279e-35	1.06895e-32	AT4G26740.1	ATS1, CLO1, ATPXG1; seed gene 1	NA
Dca41037	0	0.0738155	0.729165	47.8453	56.5681	46.8085	7.5477	4.67279	5.86318e-95	8.94604e-91	Os09t0441400-01	Similar to Elicitor-inducible cytochrome P450.	GO:0009055;GO:0020037;GO:0004497;GO:0016705
Dca25178	0.707019	0.442893	4.05092	150.815	240.285	347.507	7.15087	6.95603	1.77847e-28	2.55999e-26	Os07t0191600-01	Protein of unknown function DUF569 domain containing protein	NA
Dca39827	0.314231	0	0.162037	13.0859	16.0882	17.0009	6.54294	2.99024	1.15181e-56	4.39357e-53	NA	NA	NA
Dca30200	0.314231	0.0738155	0.97222	36.068	64.7975	17.0758	6.43216	4.32602	5.40818e-29	8.25181e-27	AT3G61510.1	ACS1, AT-ACS1; ACC synthase 1	GO:0016847;GO:0030170;GO:0016769
Dca8218	0.314231	1.03342	0.810183	31.6515	75.2511	46.6587	6.12759	4.70841	2.29039e-50	4.36835e-47	AT3G63380.1	ATPase E1-E2 type family protein / haloacid dehalogenase-like hydrolase family protein	GO:0016021;GO:0005524;GO:0005388;GO:0046872;GO:0006754
Dca5252	2.5924	2.14065	5.10416	173.633	272.906	238.911	6.1246	6.85877	9.68625e-73	7.38964e-69	AT4G37970.1	ATCAD6, CAD6; cinnamyl alcohol dehydrogenase 6	GO:0046029;GO:0000166;GO:0008270
Dca58762	0.314231	1.10723	2.02546	60.6041	68.282	93.692	6.00837	5.24209	3.04009e-66	1.54619e-62	AT1G10370.1	GST30, ATGSTU17, GST30B, ERD9; Glutathione S-transferase family protein	GO:0016740
Dca14210	0.471346	0.516709	3.24073	59.0501	96.1583	101.631	5.9273	5.44942	1.54298e-30	2.80271e-28	AT1G80840.1	WRKY40, ATWRKY40; WRKY DNA-binding protein 40	GO:0043565;GO:0003700
Dca47903	0.314231	0.221447	0.48611	14.967	25.3555	22.543	5.91808	3.43666	7.51259e-51	1.63753e-47	Os02t0118200-01	Similar to Protein kinase APK1B, chloroplast precursor (EC 2.7.1.-).	GO:0005524;GO:0004674
Dca41040	0.471346	0.516709	2.99768	70.6638	85.9271	68.1532	5.82233	5.25892	2.85395e-39	1.31956e-36	Os09t0441400-01	Similar to Elicitor-inducible cytochrome P450.	GO:0009055;GO:0033772;GO:0020037
Dca43309	0	0.0738155	4.29397	59.7862	72.9528	110.618	5.79606	5.37388	5.70041e-08	1.27907e-06	AT5G52400.1	CYP715A1; cytochrome P450, family 715, subfamily A, polypeptide 1	GO:0009055;GO:0020037;GO:0004497;GO:0016705
Dca42105	0.157115	0.369078	2.99768	55.2879	71.8407	67.629	5.78949	5.05401	1.29518e-21	1.02393e-19	Os09t0441400-01	Similar to Elicitor-inducible cytochrome P450.	GO:0009055;GO:0020037;GO:0004497;GO:0016705
Dca41970	0.0785577	0	1.94444	28.8708	27.0607	47.1081	5.66957	4.14415	7.80436e-15	3.54401e-13	AT5G52400.1	CYP715A1; cytochrome P450, family 715, subfamily A, polypeptide 1	GO:0009055;GO:0020037;GO:0004497;GO:0016705
Dca51708	0	0.0738155	0.48611	6.13401	7.56218	14.0051	5.59196	2.28834	5.72651e-26	6.47222e-24	AT1G27100.1	Actin cross-linking protein	NA
Dca17075	1.64971	1.69776	4.94212	117.364	154.802	117.733	5.55869	6.05608	1.4651e-56	4.47089e-53	AT5G57150.4	basic helix-loop-helix (bHLH) DNA-binding superfamily protein	NA
Dca40428	3.14231	4.13367	22.037	359.126	503.849	355.295	5.37727	7.70116	1.65713e-18	1.02782e-16	Os05t0171900-01	Glyoxalase/bleomycin resistance protein/dioxygenase domain containing protein	NA
Dca54754	0.314231	0.738155	0.405092	15.2124	22.5383	24.1158	5.36698	3.42392	1.84926e-48	2.17046e-45	AT1G59725.1	DNAJ heat shock family protein	GO:0031072;GO:0051082;GO:0006457
Dca8169	0	0.221447	0.162037	4.74364	5.48629	6.59064	5.3381	1.60114	3.14167e-30	5.38602e-28	NA	NA	NA
Dca22515	0.392788	0.738155	8.50693	113.52	174.672	78.3388	5.24816	5.9742	1.62011e-10	4.89456e-09	Os03t0725800-01	Helix-loop-helix DNA-binding domain containing protein	NA
Dca2874	0.392788	0.147631	0.648147	8.26047	16.1623	20.5958	5.23089	2.97924	2.39349e-30	4.19769e-28	AT4G37470.1	alpha/beta-Hydrolases superfamily protein	NA
Dca30126	0.471346	0.516709	2.83564	24.945	37.9592	69.5762	5.11505	4.51757	3.97831e-20	2.81024e-18	AT1G18390.2	Protein kinase superfamily protein	GO:0005524;GO:0004715;GO:0004674
Dca31271	0.235673	0.442893	0.891202	10.3869	21.7227	21.7941	5.08742	3.2374	9.15027e-33	2.0234e-30	AT1G61290.1	SYP124, ATSYP124; syntaxin of plants 124	GO:0005484;GO:0016192
Dca25203	0.549904	0.369078	4.61805	42.5292	44.8541	92.943	5.02526	4.96143	3.1737e-13	1.25452e-11	AT3G54420.1	ATEP3, ATCHITIV, CHIV, EP3; homolog of carrot EP3-3 chitinase	GO:0004568;GO:0016998;GO:0006032
Dca35476	2.35673	6.05287	8.831	148.198	242.509	162.295	5.00211	6.57319	6.22323e-38	2.49879e-35	AT5G05600.1	2-oxoglutarate (2OG) and Fe(II)-dependent oxygenase superfamily protein	GO:0005506;GO:0016706
Dca55681	0.0785577	0.147631	0.48611	6.2158	8.15529	8.53788	4.9762	2.03751	7.13518e-33	1.6249e-30	AT1G59725.1	DNAJ heat shock family protein	GO:0031072;GO:0051082;GO:0006457
Dca16415	1.96394	1.99302	8.02082	72.7085	112.765	173.903	4.90787	5.95605	7.61146e-23	6.67446e-21	AT2G20780.1	Major facilitator superfamily protein	GO:0016021;GO:0032440;GO:0022891;GO:0008643
Dca31272	2.43529	3.91222	5.7523	72.4632	127.964	155.479	4.87711	5.94306	8.29044e-45	7.02753e-42	AT3G11820.1	SYP121, AT-SYR1, ATSYP121, SYR1, ATSYR1, PEN1; syntaxin of plants 121	GO:0016020;GO:0005484;GO:0006886;GO:0016192
Dca11742	0.707019	0.885786	1.13426	12.0227	19.2761	49.5047	4.87669	3.81902	4.87591e-22	3.99982e-20	AT2G30020.1	Protein phosphatase 2C family protein	GO:0008287;GO:0046872;GO:0004722;GO:0006470
Dca21650	0	0	1.45833	17.8295	16.9778	7.86383	4.86645	2.90781	5.35285e-11	1.68748e-09	AT5G22380.1	anac090, NAC090; NAC domain containing protein 90	GO:0003677;GO:0006355
Dca42601	0.471346	0.66434	2.34953	26.4172	32.7694	40.5175	4.84132	4.11874	8.87123e-36	3.00794e-33	AT3G09270.1	ATGSTU8, GSTU8; glutathione S-transferase TAU 8	GO:0016740
Dca1639	0.864135	1.99302	11.8287	155.64	147.092	115.261	4.83079	6.17532	4.49003e-13	1.7344e-11	Os06t0179500-00	Protein of unknown function DUF247, plant family protein	NA
Dca745	0.549904	0.295262	1.53935	21.7553	21.871	21.9438	4.78718	3.52211	3.33556e-44	2.5447e-41	AT1G11300.1	protein serine/threonine kinases;protein kinases;ATP binding;sugar binding;kinases;carbohydrate binding	GO:0005524;GO:0004674;GO:0005529;GO:0048544
Dca4257	0.628462	1.10723	3.72684	35.2501	43.0748	71.7481	4.78045	4.70609	1.24199e-23	1.16977e-21	AT2G38470.1	WRKY33, ATWRKY33; WRKY DNA-binding protein 33	GO:0043565;GO:0003700
Dca30498	0.157115	0.516709	1.21528	13.5766	14.6795	23.8911	4.77852	3.19828	1.13828e-30	2.09251e-28	AT2G38470.1	WRKY33, ATWRKY33; WRKY DNA-binding protein 33	GO:0043565;GO:0003700
Dca18053	4.71346	4.20748	21.4699	104.524	479.383	242.955	4.76584	7.1607	1.47674e-13	6.04078e-12	AT5G66920.1	sks17; SKU5 similar 17	GO:0005507;GO:0008447
Dca24079	0.0785577	0.295262	0.648147	4.74364	10.157	13.1064	4.75137	2.32786	2.94952e-21	2.27292e-19	AT4G32800.1	Integrase-type DNA-binding superfamily protein	GO:0005634;GO:0003677;GO:0003700;GO:0006351
Dca31681	0.628462	0.442893	5.02314	35.7409	40.7765	86.0528	4.73729	4.82229	4.28367e-12	1.49909e-10	AT4G11070.1	WRKY41, AtWRKY41; WRKY family transcription factor	GO:0043565;GO:0003700
Dca60139	0.392788	0.959602	14.4213	98.5532	209.146	91.5949	4.66101	6.11603	3.89352e-07	7.69525e-06	AT1G80840.1	WRKY40, ATWRKY40; WRKY DNA-binding protein 40	GO:0043565;GO:0003700
Dca47751	1.33548	0.885786	1.45833	19.7924	36.773	35.0502	4.63417	4.00598	5.6605e-42	3.59866e-39	Os12t0177500-01	Peptidase A1 domain containing protein	GO:0004190;GO:0006508
Dca55827	2.0425	0.66434	1.94444	16.4392	30.8418	66.1311	4.60563	4.31258	4.12908e-20	2.9033e-18	Os01t0161300-00	Hypothetical conserved gene	NA
Dca41590	0	0.221447	0.810183	4.989	9.19324	11.0843	4.59938	2.18917	9.84684e-21	7.29335e-19	AT1G14290.1	SBH2; sphingoid base hydroxylase 2	GO:0016021;GO:0000254;GO:0005506;GO:0006633
Dca29391	0.314231	0.516709	0.729165	10.4687	12.6778	14.4545	4.57137	2.74349	4.5022e-39	1.9627e-36	AT1G17180.1	ATGSTU25, GSTU25; glutathione S-transferase TAU 25	GO:0004462;GO:0016740
Dca51662	1.4926	1.99302	1.05324	14.8852	68.801	22.543	4.53653	4.22219	2.15886e-18	1.3336e-16	AT3G11930.3	Adenine nucleotide alpha hydrolases-like superfamily protein	GO:0006950
Dca1220	8.09144	15.4274	33.6226	287.481	572.279	427.268	4.4933	7.80874	8.30281e-23	7.2391e-21	AT5G45670.1	GDSL-like Lipase/Acylhydrolase superfamily protein	GO:0016788;GO:0006629
Dca2354	0.0785577	0.0738155	1.13426	5.47972	7.19149	16.4017	4.49305	2.38872	1.31458e-12	4.8684e-11	AT5G51160.1	Ankyrin repeat family protein	NA
Dca26755	0.628462	1.03342	0.162037	10.0598	15.1985	16.4766	4.47378	2.89484	1.37622e-31	2.72705e-29	NA	NA	NA
Dca9023	3.77077	6.71721	8.34489	100.843	144.497	171.282	4.46604	6.18502	4.83835e-49	6.71123e-46	NA	NA	NA
Dca738	2.43529	2.73117	7.21063	66.1656	83.0357	123.949	4.46529	5.57795	1.74932e-32	3.75931e-30	AT3G21790.1	UDP-Glycosyltransferase superfamily protein	GO:0016758
Dca31810	3.92788	2.3621	2.02546	39.5848	84.5926	59.84	4.46364	5.01092	6.77569e-41	3.82902e-38	AT2G45360.1	Protein of unknown function (DUF1442)	NA
Dca5251	6.6774	6.34813	11.8287	127.015	203.289	210.526	4.44432	6.56169	3.03181e-48	3.30424e-45	AT4G37990.1	ELI3-2, ELI3, ATCAD8, CAD-B2; elicitor-activated gene 3-2	GO:0046029;GO:0000166;GO:0008270
Dca24094	1.64971	0.66434	2.02546	22.9821	34.3264	35.949	4.42875	4.03946	1.638e-40	8.61814e-38	AT1G07150.1	MAPKKK13; mitogen-activated protein kinase kinase kinase 13	GO:0005524;GO:0004674
Dca25833	0.707019	1.03342	0.97222	8.66941	14.3088	35.6494	4.41862	3.38037	6.91932e-19	4.41737e-17	Os04t0402300-00	Similar to Cysteine-type peptidase.	NA
Dca7425	9.34837	16.7561	24.9536	266.134	382.706	427.867	4.39809	7.55568	3.85017e-36	1.36618e-33	AT4G03460.1	Ankyrin repeat family protein	NA
Dca31035	0.392788	0.147631	1.94444	10.4687	14.5312	27.1864	4.3937	3.21588	1.99805e-14	8.78567e-13	NA	NA	NA
Dca45972	0.864135	0.738155	1.7824	20.4467	25.2073	24.8647	4.38171	3.64236	8.47226e-44	6.15571e-41	AT1G11300.1	protein serine/threonine kinases;protein kinases;ATP binding;sugar binding;kinases;carbohydrate binding	GO:0005524;GO:0004674;GO:0005529;GO:0048544
Dca17458	0.157115	0.0738155	1.29629	5.39793	14.0123	11.4587	4.33716	2.48057	7.32279e-14	3.0865e-12	Os04t0398000-02	Pathogenesis-related transcriptional factor and ERF domain containing protein	GO:0005634;GO:0003677;GO:0003700;GO:0006351
Dca16951	0.942692	0.66434	1.53935	22.5732	24.1693	16.4017	4.32551	3.48647	7.4649e-40	3.79665e-37	NA	NA	NA
Dca6608	12.962	10.1865	15.8796	179.849	273.795	325.862	4.3202	7.09388	2.93818e-50	4.9812e-47	AT1G01720.1	ATAF1, ANAC002; NAC (No Apical Meristem) domain transcriptional regulator superfamily protein	GO:0003677;GO:0006355
Dca20702	0.392788	0.369078	1.45833	10.4687	20.5365	13.2562	4.31776	2.98622	1.25328e-24	1.29206e-22	AT1G20440.1	COR47, RD17, AtCOR47; cold-regulated 47	GO:0006950;GO:0009415
Dca25177	2.90663	1.77157	3.88888	44.2467	97.9377	26.8868	4.30174	4.8966	5.73173e-22	4.67672e-20	AT1G27100.1	Actin cross-linking protein	NA
Dca25183	2.19962	1.47631	5.10416	43.2652	85.6306	40.3677	4.27051	4.89982	2.09193e-24	2.09991e-22	AT5G40010.1	AATP1; AAA-ATPase 1	GO:0005524;GO:0017111
Dca40213	24.1958	21.6279	54.2013	475.754	579.248	853.488	4.25419	8.38772	2.91748e-29	4.58917e-27	AT2G40140.1	CZF1, ZFAR1, SZF2, ATSZF2; zinc finger (CCCH-type) family protein	GO:0003676;GO:0008270
Dca44761	1.09981	1.25486	3.32175	27.5622	31.1384	45.5353	4.20054	4.20883	5.02803e-31	9.71111e-29	AT3G21790.1	UDP-Glycosyltransferase superfamily protein	GO:0016758
Dca60551	5.81327	5.68379	4.8611	63.303	120.772	112.79	4.17886	5.71126	4.16402e-52	1.05891e-48	Os12t0177500-01	Peptidase A1 domain containing protein	GO:0004190;GO:0006508
Dca47750	2.19962	1.47631	2.51157	21.8371	44.4834	45.3107	4.17228	4.30915	2.91885e-34	7.95282e-32	Os12t0177500-01	Peptidase A1 domain containing protein	GO:0004190;GO:0006508
Dca47145	0.942692	0.885786	6.07638	40.8116	63.2406	38.046	4.16902	4.65374	1.23072e-13	5.08898e-12	AT2G17040.1	anac036, NAC036; NAC domain containing protein 36	GO:0003677;GO:0006355
Dca2477	1.57115	1.77157	3.32175	29.1161	49.4507	40.5175	4.15969	4.40174	9.82493e-40	4.83577e-37	Os08t0562600-03	C2 calcium-dependent membrane targeting domain containing protein	NA
Dca62317	31.8159	26.7212	38.6457	384.562	581.028	766.162	4.15537	8.2527	3.05503e-41	1.79284e-38	AT4G18950.1	Integrin-linked protein kinase family	GO:0005524;GO:0004674;GO:0009966
Dca27544	25.6098	30.412	31.1921	283.146	601.342	663.408	4.14919	8.09123	3.32071e-36	1.20637e-33	AT3G09920.1	PIP5K9; phosphatidyl inositol monophosphate 5 kinase	GO:0016308;GO:0005524
Dca29997	3.22087	4.50275	8.42591	53.1615	78.9581	153.682	4.14504	5.6586	4.05498e-24	3.94082e-22	AT1G80840.1	WRKY40, ATWRKY40; WRKY DNA-binding protein 40	GO:0043565;GO:0003700
Dca52571	1.57115	0.738155	4.05092	19.7106	22.2417	69.726	4.13403	4.31166	3.92087e-13	1.52614e-11	AT5G51160.1	Ankyrin repeat family protein	NA
Dca7424	7.93433	11.4414	11.4236	122.926	188.758	224.456	4.12024	6.5649	3.44498e-49	5.25635e-46	AT4G03460.1	Ankyrin repeat family protein	NA
Dca33717	0.628462	0.811971	2.83564	29.8522	25.1331	19.0979	4.1166	3.72365	3.77454e-24	3.69179e-22	AT4G32480.1	Protein of unknown function (DUF506)	NA
Dca7428	35.5081	46.6514	51.5277	523.763	788.394	996.011	4.10958	8.66945	2.52332e-42	1.67395e-39	AT4G03460.1	Ankyrin repeat family protein	NA
Dca36862	1.80683	1.47631	4.53703	33.1237	72.6562	27.5609	4.09243	4.56726	2.71659e-20	1.9369e-18	AT2G25737.1	Sulfite exporter TauE/SafE family protein	GO:0016021
Dca42602	0.157115	1.32868	1.94444	15.7849	17.7934	25.0145	4.08582	3.39357	1.05747e-22	9.16752e-21	Os09t0467200-01	Similar to Glutathione S-transferase GST 23 (EC 2.5.1.18) (Fragment).	NA
Dca47689	6.36317	9.00549	15.3935	114.829	190.908	210.152	4.06789	6.51243	1.11403e-33	2.88099e-31	AT3G10080.1	RmlC-like cupins superfamily protein	GO:0048046;GO:0030145;GO:0045735
Dca13191	0.392788	0.811971	2.83564	18.3203	26.0969	22.0187	4.04087	3.57498	2.92505e-20	2.07584e-18	AT2G38250.1	Homeodomain-like superfamily protein	GO:0003677
Dca17969	19.0895	19.1182	28.3564	268.343	362.614	452.358	4.02462	7.58366	5.17184e-45	4.932e-42	AT1G01720.1	ATAF1, ANAC002; NAC (No Apical Meristem) domain transcriptional regulator superfamily protein	GO:0003677;GO:0006355
Dca31336	2.98519	3.17407	15.7986	102.234	172.003	73.5456	3.98569	5.94942	3.88076e-13	1.51614e-11	AT3G56400.1	WRKY70, ATWRKY70; WRKY DNA-binding protein 70	GO:0043565;GO:0003700
Dca242	27.181	21.5541	25.7638	170.362	426.893	566.121	3.96466	7.69008	6.95292e-26	7.68751e-24	AT1G01470.1	LEA14, LSR3; Late embryogenesis abundant protein	GO:0009269
Dca34051	19.4823	20.1516	23.9004	205.367	277.132	498.717	3.9486	7.44552	1.20316e-33	3.05964e-31	Os03t0845000-01	Similar to Pirin-like protein	NA
Dca43214	0.235673	0.959602	2.75462	19.4653	23.5762	17.9745	3.9485	3.45839	4.13747e-18	2.48541e-16	NA	NA	NA
Dca46559	0.314231	0.590524	1.94444	12.1045	21.1296	10.7098	3.94633	2.99458	3.19484e-18	1.9344e-16	AT2G47260.1	WRKY23, ATWRKY23; WRKY DNA-binding protein 23	GO:0043565;GO:0003700
Dca58083	4.6349	5.97906	10.9375	79.2515	133.673	114.363	3.92531	5.86593	4.83971e-37	1.80108e-34	Os08t0562600-03	C2 calcium-dependent membrane targeting domain containing protein	NA
Dca3341	5.5776	9.74365	23.1712	189.827	217.746	172.48	3.91375	6.69008	2.41872e-22	2.05027e-20	AT3G60270.1	Cupredoxin superfamily protein	GO:0005507;GO:0009055
Dca26781	1.4926	0.66434	1.86342	17.0117	20.9813	22.3932	3.91184	3.44678	4.34711e-35	1.35364e-32	AT1G10360.1	ATGSTU18, GST29, GSTU18; glutathione S-transferase TAU 18	GO:0016740
Dca2898	4.16356	10.0389	9.64118	107.141	126.259	121.028	3.89141	5.98222	2.08146e-42	1.44359e-39	AT5G57560.1	TCH4, XTH22; Xyloglucan endotransglucosylase/hydrolase family protein	GO:0048046;GO:0005618;GO:0004553;GO:0016762;GO:0006073
Dca11743	0.864135	1.84539	4.05092	24.0453	35.735	39.9183	3.88231	4.16356	4.44679e-23	3.96778e-21	AT1G07150.1	MAPKKK13; mitogen-activated protein kinase kinase kinase 13	GO:0005524;GO:0004674
Dca8185	4.24212	14.4678	7.53471	78.8425	105.352	202.138	3.87663	6.1075	8.83332e-20	6.09859e-18	AT2G27080.1	Late embryogenesis abundant (LEA) hydroxyproline-rich glycoprotein family	NA
Dca60696	84.2924	93.4504	178.564	1551.99	1748.49	1845.01	3.85216	9.84099	4.20178e-33	9.8632e-31	AT1G72520.1	LOX4; PLAT/LH2 domain-containing lipoxygenase family protein	GO:0005506;GO:0016165;GO:0031408
Dca45787	0.314231	0.442893	4.94212	24.2089	36.9212	20.8953	3.84676	3.88639	4.27653e-08	9.76816e-07	AT1G34420.1	leucine-rich repeat transmembrane protein kinase family protein	GO:0005524;GO:0004672
Dca37588	2.27817	6.93866	8.34489	54.9608	54.2698	141.699	3.83477	5.48962	2.47742e-17	1.37456e-15	AT4G25810.1	XTR6, XTH23; xyloglucan endotransglycosylase 6	GO:0048046;GO:0005618;GO:0004553;GO:0016762;GO:0006073
Dca52689	9.97683	9.15312	12.3148	96.5085	123.812	220.936	3.81041	6.30317	2.15583e-34	5.98066e-32	AT2G40000.1	HSPRO2, ATHSPRO2; ortholog of sugar beet HS1 PRO-1 2	NA
Dca32706	9.03414	8.5626	18.1481	124.643	157.62	217.266	3.80543	6.48204	1.48197e-32	3.23028e-30	AT5G22250.1	Polynucleotidyl transferase, ribonuclease H-like superfamily protein	GO:0005634;GO:0003676
Dca21342	1.02125	1.18105	4.29397	17.0117	30.1746	43.3634	3.80197	4.03196	1.6119e-15	7.63798e-14	AT3G11760.1	unknown protein; FUNCTIONS IN: molecular_function unknown; INVOLVED IN: biological_process unknown; LOCATED IN: cellular_component unknown; EXPRESSED IN: 23 plant structures; EXPRESSED DURING: 14 growth stages	NA
Dca51261	1.57115	2.06683	5.26619	32.7147	34.4005	55.8707	3.78905	4.46948	1.63496e-23	1.53044e-21	AT4G27410.3	RD26; NAC (No Apical Meristem) domain transcriptional regulator superfamily protein	GO:0003677;GO:0006355
Dca30765	1.33548	1.62394	4.05092	24.7814	35.3643	34.8255	3.76208	4.1019	7.69741e-28	1.02128e-25	AT4G23180.1	CRK10, RLK4; cysteine-rich RLK (RECEPTOR-like protein kinase) 10	GO:0005524;GO:0004674
Dca7207	2.98519	3.24788	14.9884	81.5415	89.3375	113.913	3.74706	5.67726	1.17079e-14	5.26959e-13	AT5G25930.1	Protein kinase family protein with leucine-rich repeat domain	GO:0016021;GO:0032440;GO:0005524;GO:0004709
Dca35332	1.17837	2.58354	1.53935	20.2831	27.728	23.7413	3.74385	3.70217	5.53033e-35	1.68763e-32	NA	NA	NA
Dca8640	13.3548	13.1392	14.2592	120.881	187.127	235.915	3.73784	6.60926	3.13192e-44	2.51509e-41	AT4G30600.1	signal recognition particle receptor alpha subunit family protein	GO:0005785;GO:0005525;GO:0003924;GO:0005047;GO:0006614
Dca1254	3.37798	2.80499	0.405092	18.402	33.9557	34.6009	3.71215	3.97972	1.37695e-15	6.54503e-14	NA	NA	NA
Dca58579	2.67096	2.80499	4.61805	31.4879	50.4887	49.9541	3.70861	4.57592	3.36311e-37	1.28286e-34	AT2G41010.1	ATCAMBP25, CAMBP25; calmodulin (CAM)-binding protein of 25 kDa	NA
Dca11199	1.09981	1.10723	5.26619	20.2014	40.7765	35.8741	3.69754	4.13498	6.9737e-14	2.9475e-12	AT4G17500.1	ATERF-1, ERF-1; ethylene responsive element binding factor 1	GO:0005634;GO:0003677;GO:0003700;GO:0006351
Dca13008	7.77721	7.1601	10.4514	67.4742	125.666	134.06	3.68807	5.88145	1.09114e-38	4.62463e-36	AT4G35580.2	NTL9; NAC transcription factor-like 9	GO:0003677;GO:0006355
Dca51081	0.0785577	0.295262	1.21528	4.41649	8.45185	7.48937	3.67701	1.93741	1.16446e-14	5.25662e-13	NA	NA	NA
Dca24788	0.471346	0.738155	0.567128	6.13401	8.22943	8.76256	3.67653	2.11112	9.49361e-26	1.02733e-23	Os01t0706400-01	Protein of unknown function DUF292, eukaryotic domain containing protein	NA
Dca57867	9.19125	6.34813	8.58794	61.1766	95.9359	151.36	3.67615	5.79753	4.62365e-32	9.4322e-30	AT1G30755.1	Protein of unknown function (DUF668)	NA
Dca49643	1.02125	0.959602	0.97222	9.65085	12.3812	15.2034	3.6451	2.78032	1.15802e-29	1.92055e-27	AT2G24860.1	DnaJ/Hsp40 cysteine-rich domain superfamily protein	GO:0031072;GO:0051082
Dca40212	59.7824	48.2015	131.088	740.171	1115.35	1111.2	3.63346	9.06198	6.24694e-23	5.50959e-21	AT5G05570.1	transducin family protein / WD-40 repeat family protein	GO:0016021;GO:0016192
Dca19531	0.392788	0.369078	2.02546	7.4426	8.60013	18.1243	3.61602	2.66263	8.12486e-12	2.78582e-10	AT4G28390.1	AAC3, ATAAC3; ADP/ATP carrier 3	GO:0016021;GO:0005743;GO:0005488;GO:0005215
Dca27604	69.8378	72.4868	78.9929	622.316	1193.05	897.451	3.61549	8.9343	8.36564e-38	3.2729e-35	AT2G17840.1	ERD7; Senescence/dehydration-associated protein-related	NA
Dca8901	0.864135	0.66434	0.810183	7.60618	12.6778	8.3132	3.60071	2.41331	3.11084e-24	3.06227e-22	AT4G01580.1	AP2/B3-like transcriptional factor family protein	GO:0005634;GO:0003677;GO:0006355;GO:0006351
Dca49304	9.50548	6.86484	13.287	77.6157	174.227	104.851	3.58881	6.01296	1.00289e-28	1.5002e-26	AT5G66920.1	sks17; SKU5 similar 17	GO:0005507;GO:0008447
Dca37918	7.54154	6.86484	12.3148	99.6164	91.1169	128.293	3.57871	5.85275	7.3545e-45	6.60088e-42	AT2G05940.1	Protein kinase superfamily protein	GO:0005524;GO:0004674
Dca24406	2.27817	3.02644	3.72684	18.3203	32.9919	55.4213	3.56012	4.28412	3.58764e-21	2.75076e-19	AT5G62520.1	SRO5; similar to RCD one 5	GO:0003950
Dca47930	5.81327	5.60998	10.4514	79.1697	91.9324	86.2026	3.55776	5.54527	1.73008e-46	1.75983e-43	AT3G55430.1	O-Glycosyl hydrolases family 17 protein	GO:0043169;GO:0004553;GO:0005975
Dca42	2.98519	5.01945	5.50925	42.611	58.5698	58.1924	3.55739	4.85748	1.62501e-40	8.61814e-38	AT5G53130.1	CNGC1, ATCNGC1; cyclic nucleotide gated channel 1	GO:0016021
Dca1362	22.7817	23.0304	39.78	259.591	287.511	451.908	3.54509	7.49939	6.7317e-31	1.2839e-28	AT2G23460.1	XLG1, ATXLG1; extra-large G-protein 1	GO:0005525;GO:0004871;GO:0007186
Dca22337	7.14875	6.2005	12.0717	73.8535	102.905	117.283	3.53323	5.73933	5.39192e-38	2.22351e-35	AT2G30020.1	Protein phosphatase 2C family protein	GO:0008287;GO:0046872;GO:0004722;GO:0006470
Dca13339	38.4147	49.4564	49.6642	385.053	599.711	601.771	3.52773	8.16755	2.57558e-39	1.22807e-36	AT1G53210.1	sodium/calcium exchanger family protein / calcium-binding EF hand family protein	GO:0016021;GO:0005509;GO:0055085
Dca31870	13.3548	13.213	13.9352	91.6831	188.387	183.19	3.5151	6.39489	7.0535e-35	2.11024e-32	AT4G35580.2	NTL9; NAC transcription factor-like 9	GO:0003677;GO:0006355
Dca43856	97.8043	122.681	163.738	1123.59	1593.17	1657.17	3.50889	9.63155	1.04367e-34	3.0046e-32	AT5G42050.1	DCD (Development and Cell Death) domain protein	NA
Dca40983	0.471346	0.590524	0.648147	4.82542	7.19149	7.63915	3.50403	1.89972	8.4539e-22	6.86115e-20	Os06t0114700-03	Protein of unknown function DUF1218 family protein	NA
Dca45084	27.0238	19.192	29.4097	216.817	392.64	240.783	3.49105	7.27137	1.59938e-33	3.93602e-31	AT1G20440.1	COR47, RD17, AtCOR47; cold-regulated 47	GO:0006950;GO:0009415
Dca56852	54.9904	73.3726	137.731	876.346	915.543	1192.53	3.48748	9.08194	4.32174e-25	4.51652e-23	AT1G15520.1	PDR12, ATPDR12, ABCG40, ATABCG40; pleiotropic drug resistance 12	GO:0016020;GO:0005524;GO:0015416;GO:0015417
Dca23743	2.43529	1.77157	7.85878	35.0866	58.9405	40.8919	3.48498	4.62477	8.81203e-16	4.28197e-14	AT4G15910.1	ATDI21, DI21; drought-induced 21	GO:0006950
Dca27117	7.69865	9.00549	17.0139	103.869	161.771	108.446	3.47235	6.09046	2.34156e-30	4.15437e-28	AT1G20440.1	COR47, RD17, AtCOR47; cold-regulated 47	GO:0006950;GO:0009415
Dca23180	3.29942	3.61696	9.47915	41.7113	69.1717	70.5498	3.46938	5.05098	1.98186e-21	1.54282e-19	AT1G09850.1	XBCP3; xylem bark cysteine peptidase 3	GO:0004197;GO:0006508
Dca12100	0.549904	0.66434	1.7824	10.7141	14.6054	7.71405	3.46153	2.6247	2.75262e-18	1.67998e-16	Os08t0459600-01	Similar to 12-oxophytodienoate reductase 3 (EC 1.3.1.42) (12-oxophytodienoate- 10,11-reductase 3) (OPDA-reductase 3) (LeOPR3).	GO:0016629;GO:0010181
Dca32742	9.97683	14.8369	22.6041	109.349	189.425	218.165	3.44643	6.55834	4.96168e-26	5.69213e-24	AT5G56730.1	Insulinase (Peptidase family M16) protein	GO:0004222;GO:0008270;GO:0006508
Dca35803	7.14875	6.49576	7.29165	35.7409	58.644	133.985	3.44605	5.38346	1.1299e-18	7.09467e-17	NA	NA	NA
Dca27118	5.34192	3.54314	4.13194	30.6701	69.1717	42.0153	3.44472	4.7003	2.67228e-27	3.42635e-25	AT1G20440.1	COR47, RD17, AtCOR47; cold-regulated 47	GO:0006950;GO:0009415
Dca8538	5.81327	10.4818	9.88424	82.4411	118.771	83.5813	3.44134	5.70051	2.22072e-41	1.35535e-38	Os07t0615200-01	Tify domain containing protein	NA
Dca5705	19.0895	16.2394	27.3842	132.985	253.481	294.632	3.4412	6.95601	1.71222e-27	2.25216e-25	AT5G59790.1	Domain of unknown function (DUF966)	NA
Dca19155	26.0812	28.9357	51.4466	330.582	426.448	397.685	3.43929	7.71677	8.28984e-32	1.66429e-29	AT1G06650.2	2-oxoglutarate (2OG) and Fe(II)-dependent oxygenase superfamily protein	GO:0016706
Dca48479	0.707019	0.738155	1.21528	9.73264	9.78635	9.4366	3.43744	2.44086	3.90955e-28	5.37404e-26	AT4G21440.1	ATMYB102, ATM4, MYB102; MYB-like 102	GO:0005634;GO:0003677;GO:0006355
Dca56513	5.10625	5.90524	17.5	87.8391	128.112	92.5686	3.43657	5.81616	5.79242e-19	3.76088e-17	Os09t0467200-01	Similar to Glutathione S-transferase GST 23 (EC 2.5.1.18) (Fragment).	NA
Dca41034	2.12106	1.84539	3.15972	15.8666	33.585	26.8868	3.42105	3.81695	1.61064e-24	1.63834e-22	AT4G30780.1	unknown protein	NA
Dca51936	1.33548	3.83841	8.34489	46.9457	43.5937	54.223	3.42031	4.73025	2.12917e-15	1.00579e-13	AT5G64260.1	EXL2; EXORDIUM like 2	NA
Dca60618	35.5866	38.9008	48.2869	336.226	449.431	525.529	3.41672	7.9019	3.02156e-39	1.35597e-36	AT4G37990.1	ELI3-2, ELI3, ATCAD8, CAD-B2; elicitor-activated gene 3-2	GO:0046029;GO:0000166;GO:0008270
Dca44949	0.392788	0.738155	1.21528	7.76975	7.63632	9.73617	3.41301	2.24616	2.06146e-23	1.90992e-21	AT2G31750.1	UGT74D1; UDP-glucosyl transferase 74D1	NA
Dca16813	0.942692	4.65038	2.43055	25.3539	34.4746	26.063	3.40945	3.98417	6.49101e-19	4.1789e-17	Os06t0683400-02	Similar to EF-hand Ca2+-binding protein CCD1.	GO:0005509
Dca27999	18.5396	24.3591	40.2661	202.668	343.412	327.81	3.39348	7.31914	2.1252e-26	2.55325e-24	AT5G47530.1	Auxin-responsive family protein	GO:0016021
Dca60448	0.942692	1.9192	2.99768	8.26047	7.63632	45.3107	3.38012	3.50656	6.39187e-08	1.42375e-06	AT4G37530.1	Peroxidase superfamily protein	GO:0020037;GO:0004601;GO:0006979
Dca7749	4.39923	5.16709	3.88888	48.9085	89.1892	1.87234	3.37579	4.68584	1.66298e-05	0.000261046	AT4G27540.1	PRA1.H; prenylated RAB acceptor 1.H	NA
Dca48087	1.02125	0.811971	2.99768	10.9594	10.2312	28.7592	3.3702	3.21779	1.37744e-11	4.57887e-10	AT1G23460.1	Pectin lyase-like superfamily protein	GO:0005576;GO:0004650;GO:0005975;GO:0007047
Dca51658	103.303	105.704	121.041	642.681	1234.27	1480.12	3.34639	9.26376	5.53072e-27	6.91703e-25	NA	NA	NA
Dca62184	36.5293	36.2434	42.6156	274.967	386.19	511.449	3.34503	7.74716	8.88472e-35	2.60698e-32	AT4G30600.1	signal recognition particle receptor alpha subunit family protein	GO:0005785;GO:0005525;GO:0003924;GO:0005047;GO:0006614
Dca58038	42.1069	38.5317	42.5346	358.472	624.102	268.344	3.34402	7.8404	2.09501e-27	2.70895e-25	Os11t0703900-01	Heat shock protein 70.	GO:0005524;GO:0006950
Dca39881	36.765	61.8574	86.3656	422.674	909.982	537.212	3.33735	8.42064	1.14439e-20	8.39473e-19	AT1G01470.1	LEA14, LSR3; Late embryogenesis abundant protein	GO:0009269
Dca60998	4.47779	4.42893	4.69906	35.4955	70.2097	31.9047	3.33619	4.6657	3.79886e-26	4.45869e-24	Os11t0703900-01	Heat shock protein 70.	GO:0005524
Dca3904	0.235673	0.885786	2.67361	13.7402	14.6795	9.73617	3.32855	2.83762	2.78248e-12	1.00367e-10	Os01t0826400-01	WRKY transcription factor 24 (WRKY24).	GO:0043565;GO:0003700
Dca58187	31.3445	32.9955	39.618	247.651	291.589	493.549	3.31232	7.5671	2.54821e-30	4.41825e-28	AT1G17750.1	PEPR2, AtPEPR2; PEP1 receptor 2	GO:0016021;GO:0005524;GO:0004674
Dca45380	13.4334	14.3202	18.0671	88.8205	166.59	197.12	3.30373	6.37931	2.98317e-29	4.64461e-27	AT1G61210.1	Transducin/WD40 repeat-like superfamily protein	NA
Dca3971	21.9176	27.5332	35.324	213.709	268.532	348.93	3.29333	7.25582	3.08375e-34	8.25471e-32	AT5G06320.1	NHL3; NDR1/HIN1-like 3	NA
Dca19432	6.99164	6.71721	12.1528	58.5594	81.6271	112.415	3.28876	5.54194	2.87712e-29	4.57283e-27	AT1G28380.1	NSL1; MAC/Perforin domain-containing protein	NA
Dca54505	2.0425	2.06683	2.10648	12.0227	24.021	24.7149	3.28441	3.50407	2.73475e-23	2.46904e-21	AT5G62620.1	Galactosyltransferase family protein	GO:0005794;GO:0016021;GO:0047220;GO:0005529;GO:0006486
Dca850	3.22087	4.2813	5.59027	30.5883	38.404	57.4434	3.27049	4.55038	1.38459e-28	2.01201e-26	AT3G22750.1	Protein kinase superfamily protein	GO:0005524;GO:0004674
Dca16666	13.669	13.0653	26.8171	127.015	183.791	204.535	3.26709	6.56974	3.14422e-27	3.99788e-25	Os05t0414700-01	Similar to BRASSINOSTEROID INSENSITIVE 1-associated receptor kinase 1.	GO:0005524;GO:0004672
Dca36475	0.235673	1.03342	1.70139	7.4426	10.2312	10.8596	3.25739	2.43833	5.46294e-17	2.94535e-15	AT5G64260.1	EXL2; EXORDIUM like 2	NA
Dca20554	0.157115	0.516709	1.86342	7.52439	10.3795	6.36596	3.2573	2.21099	6.17984e-12	2.12849e-10	Os03t0126700-01	Similar to Barley stem rust resistance protein	GO:0046872;GO:0030001
Dca31117	0.864135	0.738155	1.37731	6.70652	11.5657	10.2604	3.25703	2.43959	1.78144e-20	1.28821e-18	AT5G61210.1	SNAP33, ATSNAP33, SNP33, ATSNAP33B; soluble N-ethylmaleimide-sensitive factor adaptor protein 33	NA
Dca48199	0.471346	0.959602	0.810183	6.2158	9.1191	6.36596	3.25519	2.05588	1.50015e-20	1.08996e-18	Os06t0186600-02	Similar to predicted protein	NA
Dca29401	6.28462	8.19352	5.99536	52.6707	92.3031	50.5532	3.25234	5.17704	2.42155e-32	5.13167e-30	AT5G03760.1	ATCSLA09, CSLA09, ATCSLA9, CSLA9, RAT4; Nucleotide-diphospho-sugar transferases superfamily protein	NA
Dca41954	35.9009	34.4718	33.7846	185.738	347.341	455.653	3.24653	7.51047	2.73371e-26	3.23341e-24	AT5G12080.1	MSL10, ATMSL10; mechanosensitive channel of small conductance-like 10	GO:0016020;GO:0055085
Dca30201	1.96394	1.18105	1.53935	7.93332	9.78635	26.1379	3.22213	3.04799	4.74701e-13	1.82443e-11	AT4G01250.1	WRKY22, AtWRKY22; WRKY family transcription factor	GO:0043565;GO:0003700
Dca32409	1.02125	0.811971	2.91666	6.95188	14.9761	21.7192	3.20098	3.04418	1.35934e-11	4.53848e-10	AT3G54420.1	ATEP3, ATCHITIV, CHIV, EP3; homolog of carrot EP3-3 chitinase	GO:0008061;GO:0004568;GO:0016998;GO:0006032
Dca8071	14.2189	11.3676	16.2847	131.513	160.882	85.7532	3.175	6.13268	1.44747e-33	3.62057e-31	AT4G11800.1	Calcineurin-like metallo-phosphoesterase superfamily protein	GO:0016787
Dca59161	2.35673	1.84539	2.75462	16.6845	23.6503	22.3932	3.17237	3.55901	1.38871e-29	2.27837e-27	AT3G50930.1	BCS1; cytochrome BC1 synthesis	GO:0005524;GO:0017111;GO:0008233;GO:0051301;GO:0006508
Dca12667	1.02125	1.40249	2.59259	13.2495	16.6071	14.754	3.15265	3.07676	1.56227e-24	1.59981e-22	AT1G18390.2	Protein kinase superfamily protein	GO:0005524;GO:0004715;GO:0004674
Dca511	6.1275	5.31472	7.0486	27.9711	56.5681	78.2639	3.13775	4.92622	4.0106e-21	3.04446e-19	AT5G62520.1	SRO5; similar to RCD one 5	GO:0003950
Dca17197	0.392788	0.811971	1.05324	5.47972	8.74841	5.76681	3.13429	1.95475	9.88685e-18	5.73588e-16	Os11t0704600-03	Glycoside hydrolase, family 17 protein	GO:0043169;GO:0004553;GO:0005975
Dca51079	0.471346	0.66434	2.51157	7.68796	13.345	10.9345	3.13396	2.61038	2.63085e-12	9.53128e-11	NA	NA	NA
Dca25492	6.59885	3.54314	8.10183	30.8336	66.0579	63.0605	3.13333	4.90132	4.67086e-20	3.26917e-18	AT2G39650.1	Protein of unknown function (DUF506)	NA
Dca47669	26.8667	17.8634	19.9305	141.409	187.868	234.866	3.12497	6.71395	9.11163e-34	2.39699e-31	Os05t0591900-07	Similar to Hypersensitive-induced response protein	GO:0016020
Dca44466	0.785577	1.69776	3.80786	14.5581	26.6159	13.406	3.11628	3.36696	7.70171e-13	2.90873e-11	NA	NA	NA
Dca39698	0.0785577	0.885786	4.37499	12.4316	16.2364	17.5251	3.11149	3.13016	4.39606e-06	7.45278e-05	AT3G25070.1	RIN4; RPM1 interacting protein 4	NA
Dca44350	43.8352	57.4285	61.3309	334.59	473.229	597.127	3.11099	8.03032	1.77342e-29	2.8786e-27	AT4G11280.1	ACS6, ATACS6; 1-aminocyclopropane-1-carboxylic acid (acc) synthase 6	GO:0016847;GO:0030170;GO:0016769
Dca11771	2.43529	2.06683	2.59259	15.0488	27.8763	18.3489	3.10838	3.53246	5.53272e-24	5.31676e-22	Os06t0186600-02	Similar to predicted protein	NA
Dca8192	18.1468	20.2254	39.1319	185.329	241.397	229.549	3.08231	6.93625	6.87905e-26	7.66135e-24	AT3G45640.1	ATMPK3, MPK3, ATMAPK3; mitogen-activated protein kinase 3	GO:0005524;GO:0004707
Dca6505	4.71346	4.87182	4.8611	34.0233	55.2336	33.2528	3.08193	4.52356	2.78939e-31	5.45647e-29	AT5G03760.1	ATCSLA09, CSLA09, ATCSLA9, CSLA9, RAT4; Nucleotide-diphospho-sugar transferases superfamily protein	NA
Dca47661	7.14875	5.53616	5.91434	33.4508	60.275	63.8094	3.08146	4.88455	4.38e-28	5.96697e-26	AT3G28630.1	Protein of unknown function (DUF569)	NA
Dca47146	16.8899	16.7561	20.9027	104.524	196.468	153.382	3.05822	6.40944	3.51613e-32	7.34919e-30	AT4G35230.1	BSK1; BR-signaling kinase 1	GO:0005524;GO:0004672
Dca46182	37.7077	32.4788	46.4235	224.014	323.839	420.303	3.05363	7.49964	1.28932e-28	1.89158e-26	AT4G24570.1	DIC2; dicarboxylate carrier 2	GO:0016021;GO:0005743;GO:0005488
Dca12546	0.628462	0.738155	3.0787	9.65085	12.9002	14.1549	3.04868	2.81263	5.22569e-12	1.8204e-10	AT1G25390.1	Protein kinase superfamily protein	GO:0005524;GO:0004674
Dca7447	43.6781	44.3631	60.4397	309.89	445.353	472.804	3.04806	7.84297	4.63635e-32	9.4322e-30	AT5G62680.1	Major facilitator superfamily protein	GO:0016020;GO:0005215;GO:0006857
Dca25194	0.864135	1.32868	3.15972	13.9038	15.1985	14.9787	3.04347	3.07055	8.50736e-19	5.38611e-17	AT1G21230.1	WAK5; wall associated kinase 5	GO:0016021;GO:0005524;GO:0005509;GO:0004674
Dca19163	4.16356	5.75761	4.61805	27.7257	40.9989	50.5532	3.0326	4.49075	9.11019e-29	1.37627e-26	NA	NA	NA
Dca59652	8.79846	9.59602	11.4236	74.835	90.7462	76.3915	3.02032	5.50672	9.82876e-49	1.24973e-45	Os10t0203000-01	Endonuclease/exonuclease/phosphatase domain containing protein	NA
Dca56438	0.314231	0.811971	1.29629	5.64329	7.04321	7.04	3.01782	1.94717	5.60261e-18	3.33924e-16	AT4G13010.1	Oxidoreductase, zinc-binding dehydrogenase family protein	GO:0016491;GO:0008270
Dca6114	5.49904	7.82444	6.88656	37.0494	35.6609	90.3966	3.01048	4.94166	6.30602e-18	3.74386e-16	AT5G45340.1	CYP707A3; cytochrome P450, family 707, subfamily A, polypeptide 3	GO:0009055;GO:0020037
Dca60929	32.68	36.9078	60.7638	280.365	324.803	431.163	2.99112	7.60451	2.16733e-25	2.29647e-23	AT2G32150.1	Haloacid dehalogenase-like hydrolase (HAD) superfamily protein	GO:0016787
Dca1479	6.75596	12.0319	21.3078	107.795	97.7894	111.816	2.98491	5.90069	6.87115e-21	5.13922e-19	AT3G14690.1	CYP72A15; cytochrome P450, family 72, subfamily A, polypeptide 15	GO:0009055;GO:0020037;GO:0004497;GO:0016705
Dca5218	39.3574	48.792	51.8517	298.44	386.783	420.603	2.98142	7.69914	1.1922e-34	3.36862e-32	AT5G65280.1	GCL1; GCR2-like 1	NA
Dca604	13.2763	14.6893	22.7662	95.6088	121.662	181.917	2.97631	6.23197	2.27786e-25	2.39694e-23	AT5G48380.1	BIR1; BAK1-interacting receptor-like kinase 1	GO:0005524;GO:0004672;GO:0004872
Dca61699	8.17	8.48878	7.61572	39.7484	68.2079	82.383	2.96959	5.16805	2.45962e-28	3.44302e-26	AT1G28760.1	Uncharacterized conserved protein (DUF2215)	NA
Dca9550	3.14231	3.83841	3.80786	24.1271	35.735	24.7898	2.96877	4.00704	3.45888e-29	5.33086e-27	AT1G52720.1	unknown protein	NA
Dca33324	1.64971	1.99302	2.75462	10.1416	17.1261	22.6928	2.96315	3.25884	6.6063e-18	3.89185e-16	AT5G61210.1	SNAP33, ATSNAP33, SNP33, ATSNAP33B; soluble N-ethylmaleimide-sensitive factor adaptor protein 33	NA
Dca19635	1.64971	1.99302	4.21295	19.8742	29.5073	11.6085	2.95643	3.54073	9.09914e-14	3.80369e-12	AT4G21410.1	CRK29; cysteine-rich RLK (RECEPTOR-like protein kinase) 29	GO:0005524;GO:0004674
Dca46764	9.42692	9.00549	10.9375	56.8419	72.2856	96.9124	2.94407	5.41765	3.22196e-35	1.04597e-32	AT5G39785.2	Protein of unknown function (DUF1666)	GO:0005840;GO:0003735;GO:0006412
Dca20052	41.2428	45.3965	50.3934	228.267	385.152	432.96	2.93269	7.62512	3.6348e-27	4.58345e-25	AT1G18300.1	atnudt4, NUDT4; nudix hydrolase homolog 4	GO:0016787
Dca19144	2.67096	2.8788	4.05092	13.413	18.7572	41.1166	2.93076	3.80702	5.83427e-14	2.48657e-12	AT2G45550.1	CYP76C4; cytochrome P450, family 76, subfamily C, polypeptide 4	GO:0009055;GO:0020037;GO:0004497;GO:0016705
Dca38830	140.54	144.678	158.715	750.067	1227.89	1366.14	2.91316	9.30268	5.94867e-27	7.37925e-25	AT4G37640.1	ACA2; calcium ATPase 2	GO:0016021;GO:0005524;GO:0005388;GO:0005516;GO:0046872;GO:0006754
Dca45439	49.8056	50.5636	46.3425	274.231	479.902	350.652	2.91246	7.70572	9.54506e-30	1.60042e-27	AT2G46860.1	AtPPa3, PPa3; pyrophosphorylase 3	GO:0005737;GO:0004427;GO:0000287;GO:0006796
Dca21491	0.549904	1.03342	1.13426	2.29003	14.2347	4.04426	2.90869	2.02476	5.46878e-07	1.06161e-05	AT2G39540.1	Gibberellin-regulated family protein	NA
Dca21114	7.46298	10.4818	14.2592	67.8831	87.6323	84.9294	2.90046	5.51136	5.14286e-33	1.18894e-30	AT5G44210.1	ERF9, ATERF9, ATERF-9; erf domain protein 9	GO:0005634;GO:0003677;GO:0003700;GO:0006351
Dca54163	2.67096	3.83841	6.88656	29.5251	35.8833	34.3013	2.89675	4.24928	1.20698e-22	1.04046e-20	AT1G18390.2	Protein kinase superfamily protein	GO:0005524;GO:0004715;GO:0004674
Dca56049	46.4276	49.3826	63.7614	270.714	338.593	569.042	2.88444	7.80197	3.56545e-22	2.97277e-20	AT5G48380.1	BIR1; BAK1-interacting receptor-like kinase 1	GO:0005524;GO:0004672;GO:0004872
Dca13352	20.5821	21.185	23.8194	88.9023	155.692	238.461	2.88045	6.51772	1.04698e-20	7.71733e-19	AT1G78600.2	LZF1; light-regulated zinc finger protein 1	GO:0008270
Dca58517	17.5184	21.7018	20.0115	76.1436	164.737	194.274	2.8765	6.36787	8.64279e-21	6.43276e-19	Os05t0223000-01	Similar to TCH2 (TOUCH 2); calcium ion binding.	GO:0005509
Dca17615	16.8113	28.0499	42.1295	190.727	162.735	282.499	2.86992	6.91478	4.51281e-19	2.94259e-17	AT5G57560.1	TCH4, XTH22; Xyloglucan endotransglucosylase/hydrolase family protein	GO:0048046;GO:0005618;GO:0004553;GO:0016762;GO:0006073
Dca18414	8.01289	8.78404	12.5578	55.1243	75.4735	83.4315	2.86665	5.34832	7.74293e-33	1.73738e-30	AT4G18530.1	Protein of unknown function (DUF707)	NA
Dca38336	12.4907	15.3536	15.7176	61.3401	91.71	158.4	2.83723	5.89127	5.85399e-21	4.40001e-19	AT5G09960.1	FUNCTIONS IN: molecular_function unknown; INVOLVED IN: biological_process unknown; LOCATED IN: plasma membrane; EXPRESSED IN: 22 plant structures; EXPRESSED DURING: 13 growth stages; CONTAINS InterPro DOMAIN/s: RPM1-interacting protein 4, defence response (InterPro:IPR008700)	NA
Dca34926	3.29942	6.56958	7.37267	40.4845	41.2213	41.4911	2.83494	4.55888	1.65922e-26	2.02531e-24	AT3G14690.1	CYP72A15; cytochrome P450, family 72, subfamily A, polypeptide 15	GO:0009055;GO:0020037;GO:0004497;GO:0016705
Dca51503	0.157115	1.03342	0.405092	2.78075	3.55867	5.24256	2.81879	1.2421	8.89804e-11	2.73171e-09	AT5G13900.1	Bifunctional inhibitor/lipid-transfer protein/seed storage 2S albumin superfamily protein	GO:0008289;GO:0006869
Dca20553	1.4926	2.8788	3.24073	15.2941	26.0228	12.5072	2.81775	3.37995	9.28051e-16	4.49477e-14	AT5G52640.1	HSP81-1, ATHS83, HSP81.1, HSP83, ATHSP90.1, AtHsp90-1, HSP90.1; heat shock protein 90.1	GO:0005524;GO:0051082;GO:0006457;GO:0006950
Dca36872	118.465	121.426	204.976	728.394	1134.1	1273.04	2.8173	9.22138	1.32737e-20	9.6904e-19	AT1G52190.1	Major facilitator superfamily protein	GO:0016020;GO:0005215;GO:0006857
Dca14217	47.4489	52.7043	55.9027	274.313	416.81	408.695	2.81699	7.71074	2.23182e-30	4.00624e-28	AT2G32190.1	unknown protein	NA
Dca42960	63.0033	44.2155	44.9652	189.746	363.948	515.643	2.8127	7.67084	2.07382e-17	1.15906e-15	AT1G78280.1	transferases, transferring glycosyl groups	GO:0016772
Dca22681	2.27817	2.43591	5.91434	11.4502	15.7916	47.4077	2.81177	3.84763	2.1955e-08	5.2098e-07	Os12t0119800-01	Similar to Harpin-induced protein 1 containing protein, expressed.	NA
Dca24817	3.22087	3.10025	3.64583	14.8034	23.4279	31.006	2.7948	3.74197	8.64943e-20	5.99878e-18	AT5G04760.1	Duplicated homeodomain-like superfamily protein	GO:0003677;GO:0006355
Dca39419	25.8455	21.8494	33.8657	167.908	241.767	150.836	2.78105	6.7439	1.75399e-27	2.28739e-25	AT2G17890.1	CPK16; calcium-dependent protein kinase 16	GO:0005524;GO:0005509;GO:0004674
Dca30022	6.83452	10.9247	14.9074	63.1395	73.3235	88.0749	2.78096	5.42753	4.22711e-26	4.90212e-24	NA	NA	NA
Dca16261	9.89827	6.12669	8.58794	27.0714	30.916	110.543	2.77489	5.01688	6.01971e-10	1.7136e-08	Os01t0948500-01	Armadillo-like helical domain containing protein	GO:0005488
Dca34868	2.0425	3.69078	8.831	25.1904	36.1798	38.1958	2.77391	4.26254	2.60896e-12	9.50061e-11	AT4G05200.1	CRK25; cysteine-rich RLK (RECEPTOR-like protein kinase) 25	GO:0005524;GO:0004674
Dca25773	0.785577	1.55013	3.88888	16.0302	14.3088	11.983	2.76568	3.04328	3.10627e-12	1.10737e-10	AT5G60900.1	RLK1; receptor-like protein kinase 1	GO:0005524;GO:0004674
Dca25773	0.785577	1.55013	3.88888	16.0302	14.3088	11.983	2.76568	3.04328	3.10627e-12	1.10737e-10	AT5G60900.1	RLK1; receptor-like protein kinase 1	GO:0005524;GO:0004674;GO:0005529;GO:0048544
Dca25773	0.785577	1.55013	3.88888	16.0302	14.3088	11.983	2.76568	3.04328	3.10627e-12	1.10737e-10	Os04t0475200-00	Similar to OSIGBa0106G07.3 protein	GO:0005524;GO:0004674
Dca25773	0.785577	1.55013	3.88888	16.0302	14.3088	11.983	2.76568	3.04328	3.10627e-12	1.10737e-10	Os04t0475200-00	Similar to OSIGBa0106G07.3 protein	GO:0005524;GO:0004674;GO:0005529;GO:0048544
Dca747	0.942692	1.47631	5.02314	15.3759	18.6089	16.5515	2.76521	3.29646	1.75102e-10	5.24894e-09	AT1G11330.2	S-locus lectin protein kinase family protein	GO:0005524;GO:0004674;GO:0005529;GO:0048544
Dca37721	51.6124	55.8783	54.2823	246.833	449.283	401.505	2.76216	7.71481	7.93306e-26	8.64591e-24	AT1G73920.1	alpha/beta-Hydrolases superfamily protein	GO:0006629
Dca11192	2.35673	2.73117	2.83564	15.6213	20.9813	16.926	2.75236	3.37996	2.004e-25	2.13825e-23	AT4G17410.3	DWNN domain, a CCHC-type zinc finger	GO:0005634;GO:0003676;GO:0008270
Dca61274	2.12106	2.65736	2.67361	15.8666	15.6433	18.7983	2.7501	3.29141	5.40262e-26	6.15174e-24	Os04t0655300-01	Protein kinase, core domain containing protein	GO:0005524;GO:0004674
Dca55707	26.8667	27.3856	32.2453	149.752	211	221.011	2.74966	6.80158	3.88857e-33	9.2706e-31	AT1G09070.1	SRC2, (AT)SRC2; soybean gene regulated by cold-2	GO:0005783;GO:0000326;GO:0005515;GO:0006623
Dca57607	2.12106	2.65736	5.26619	16.3574	16.7554	34.0017	2.74039	3.70387	4.13942e-13	1.6071e-11	AT1G74360.1	Leucine-rich repeat protein kinase family protein	GO:0016021;GO:0005524;GO:0004674
Dca34156	4.79202	4.94564	5.34721	26.8261	34.2522	39.7685	2.73971	4.28499	1.79886e-29	2.88917e-27	AT3G27890.1	NQR; NADPH:quinone oxidoreductase	NA
Dca52844	4.87058	7.1601	32.5694	85.7944	99.9394	111.816	2.73829	5.83767	8.59809e-08	1.8688e-06	Os04t0186400-02	Similar to Phosphate transporter 6.	GO:0016021;GO:0005315
Dca37859	2.82808	1.99302	2.51157	11.0412	17.4968	20.3711	2.73654	3.25538	4.43264e-19	2.90272e-17	AT5G59090.1	ATSBT4.12, SBT4.12; subtilase 4.12	GO:0042802;GO:0004252;GO:0043086;GO:0006508
Dca27020	6.99164	5.90524	7.85878	33.0419	41.592	63.5098	2.73461	4.73654	5.55983e-23	4.93208e-21	AT2G33490.1	hydroxyproline-rich glycoprotein family protein	GO:0005737
Dca39408	62.7676	59.9382	66.9211	313.08	444.315	499.541	2.72862	7.91451	2.64525e-28	3.6692e-26	AT3G51120.1	DNA binding;zinc ion binding;nucleic acid binding;nucleic acid binding	GO:0005634;GO:0003677;GO:0008270;GO:0016570;GO:0006352
Dca2973	36.2151	39.7127	44.317	192.853	299.967	303.469	2.72721	7.25677	1.09281e-28	1.61884e-26	AT5G63770.1	ATDGK2, DGK2; diacylglycerol kinase 2	GO:0004143;GO:0007205;GO:0035556
Dca44873	6.83452	5.01945	6.23841	31.5697	48.7835	39.0945	2.72304	4.52962	2.43862e-28	3.44302e-26	AT2G01170.1	BAT1; bidirectional amino acid transporter 1	GO:0016021;GO:0015171
Dca20041	2.90663	2.80499	3.40277	13.0859	24.6883	22.2434	2.71794	3.5485	1.19843e-19	8.23679e-18	AT1G30320.1	Remorin family protein	NA
Dca19309	30.3233	27.4594	29.9768	144.926	191.501	240.783	2.71735	6.79448	1.05457e-30	1.96227e-28	AT2G38000.1	chaperone protein dnaJ-related	GO:0031072;GO:0051082
Dca41380	34.4868	30.1167	42.8587	167.581	212.26	324.664	2.71288	7.0822	2.06539e-23	1.90992e-21	AT4G32850.8	nPAP; nuclear poly(a) polymerase	GO:0005634;GO:0004652;GO:0003723;GO:0043631;GO:0006351
Dca17053	35.7438	37.5721	48.449	200.623	283.952	309.985	2.7061	7.25642	5.84628e-28	7.89403e-26	AT5G43280.1	ATDCI1, DCI1; delta(3,5),delta(2,4)-dienoyl-CoA isomerase 1	NA
Dca30215	61.0393	59.9382	67.7313	284.536	445.057	497.219	2.70063	7.88326	1.22727e-25	1.31871e-23	Os02t0261100-01	Ubiquitin-conjugating enzyme OsUBC5b.	GO:0016881;GO:0005524
Dca56698	3.5351	3.24788	5.99536	22.3278	25.059	34.9753	2.68969	4.00228	1.98038e-20	1.42532e-18	AT3G21780.1	UGT71B6; UDP-glucosyl transferase 71B6	GO:0016758
Dca30054	2.27817	5.16709	16.5277	55.5333	71.9149	26.5872	2.68367	4.89839	6.45139e-07	1.23507e-05	AT2G17040.1	anac036, NAC036; NAC domain containing protein 36	GO:0003677;GO:0006355
Dca35355	29.1449	32.3312	34.1087	128.896	192.613	285.944	2.6677	6.87474	1.03708e-21	8.24152e-20	Os12t0277400-01	Armadillo-like helical domain containing protein	GO:0000151;GO:0005488;GO:0004842
Dca31703	0.392788	0.66434	0.729165	2.45361	4.67076	4.34383	2.66754	1.24989	1.32127e-11	4.42105e-10	Os03t0126700-01	Similar to Barley stem rust resistance protein	GO:0046872;GO:0030001
Dca26452	1.09981	1.18105	1.05324	3.84398	7.04321	10.4102	2.66611	2.09825	9.08772e-12	3.0951e-10	Os01t0706400-01	Protein of unknown function DUF292, eukaryotic domain containing protein	NA
Dca516	4.39923	3.69078	2.83564	20.3649	31.4349	16.6264	2.64292	3.74362	2.44467e-18	1.49802e-16	Os09t0368200-00	Similar to polyamine oxidase precursor.	GO:0016491
Dca42603	11.2338	14.9845	17.2569	68.5374	87.6323	114.962	2.64042	5.71726	7.32184e-28	9.79971e-26	AT3G09270.1	ATGSTU8, GSTU8; glutathione S-transferase TAU 8	GO:0016740
Dca15788	22.4675	18.7491	22.4421	118.346	154.283	120.729	2.62748	6.25432	1.85409e-35	6.14993e-33	AT3G06500.1	Plant neutral invertase family protein	GO:0033926
Dca50017	16.8113	21.185	15.8796	88.6569	122.7	120.803	2.62281	6.01156	2.1425e-33	5.18893e-31	Os03t0436300-00	Similar to calmodulin binding protein	NA
Dca29205	2.43529	1.18105	2.34953	7.76975	12.8261	16.1021	2.62225	2.86489	5.62013e-14	2.40201e-12	AT1G30320.1	Remorin family protein	NA
Dca14192	129.306	128.07	174.838	620.68	964.4	1074.42	2.62136	9.00973	4.01867e-22	3.31442e-20	Os03t0819300-01	Similar to Annexin A7 (Annexin VII) (Synexin) (Fragment).	NA
Dca3615	42.3426	52.1137	69.1086	272.514	310.494	422.176	2.61952	7.60706	3.21611e-23	2.88655e-21	AT1G71697.1	ATCK1, CK, CK1; choline kinase 1	GO:0004103
Dca30729	10.841	11.589	14.6643	66.4927	86.7427	74.2196	2.61653	5.46795	4.56882e-36	1.58434e-33	Os02t0678400-01	NAD(P)-binding domain containing protein	GO:0008831;GO:0000166;GO:0045226
Dca40236	3.06375	3.91222	3.24073	13.5766	20.7589	28.0851	2.6071	3.61883	1.91096e-17	1.07592e-15	AT5G25170.1	PPPDE putative thiol peptidase family protein	NA
Dca28086	7.6201	7.38155	6.80554	35.7409	50.5628	46.0596	2.60015	4.69311	5.53006e-30	9.37529e-28	Os08t0517700-02	Similar to Oxysterol-binding protein OBPa.	NA
Dca5728	1.09981	0.885786	2.1875	6.37937	7.19149	11.6834	2.59916	2.34215	2.41164e-12	8.80305e-11	AT2G30140.1	UDP-Glycosyltransferase superfamily protein	GO:0047215
Dca26935	3.69221	4.50275	2.51157	10.0598	37.5885	17.0009	2.58967	3.67265	8.87641e-10	2.48437e-08	AT5G14450.1	GDSL-like Lipase/Acylhydrolase superfamily protein	GO:0016788;GO:0006629
Dca44790	1.57115	1.03342	1.62037	5.80687	8.74841	10.8596	2.58786	2.35354	1.91278e-14	8.43501e-13	AT2G24860.1	DnaJ/Hsp40 cysteine-rich domain superfamily protein	GO:0031072;GO:0051082
Dca6601	16.9685	22.7352	34.1087	126.688	130.262	185.437	2.58349	6.42964	1.37955e-21	1.08501e-19	Os11t0195500-01	Hypothetical conserved gene	GO:0004806;GO:0006629
Dca26655	9.34837	12.4748	21.956	60.6858	77.5494	123.949	2.58256	5.67722	8.77286e-16	4.27656e-14	AT1G27100.1	Actin cross-linking protein	NA
Dca42283	40.85	30.0429	30.6249	122.68	210.036	270.965	2.57192	6.87918	2.1333e-19	1.43392e-17	AT5G51280.1	DEAD-box protein abstrakt, putative	GO:0005524;GO:0008026;GO:0003676;GO:0008270
Dca17604	7.6201	4.72419	11.0995	30.5065	44.1127	62.7609	2.55221	4.75379	5.25794e-15	2.43108e-13	AT1G34750.1	Protein phosphatase 2C family protein	GO:0003824
Dca49316	86.492	97.3626	101.03	344.159	597.783	724.821	2.54853	8.34633	3.12156e-19	2.06185e-17	AT5G42570.1	B-cell receptor-associated 31-like	GO:0005783;GO:0016021;GO:0006886
Dca6731	0.392788	0.959602	0.729165	2.94433	4.15179	5.16766	2.53809	1.35543	1.78549e-11	5.89674e-10	Os05t0182500-02	Rad6 (Ubiquitin carrier protein).	GO:0016881
Dca12158	8.95558	10.1865	9.96526	38.767	58.9405	71.2988	2.53673	5.05302	1.92293e-24	1.94305e-22	AT5G25170.1	PPPDE putative thiol peptidase family protein	NA
Dca42373	130.563	138.699	149.074	870.948	825.983	714.71	2.52721	8.8821	1.86153e-28	2.6545e-26	AT3G21670.1	Major facilitator superfamily protein	GO:0016020;GO:0005215;GO:0006857
Dca34940	26.3168	27.3117	23.9004	86.5305	156.582	203.786	2.52672	6.45271	1.74316e-19	1.18737e-17	AT3G22370.1	AOX1A, ATAOX1A; alternative oxidase 1A	GO:0016021;GO:0005740;GO:0070469;GO:0046872;GO:0016491;GO:0022900;GO:0007585
Dca977	2.19962	4.05985	2.67361	10.0598	17.7934	23.2919	2.51117	3.34981	3.40145e-13	1.33761e-11	Os03t0654500-01	Domain of unknown function DUF2215 domain containing protein	NA
Dca47590	31.6588	42.1487	58.1712	243.479	267.123	238.686	2.50523	7.20007	1.05455e-23	9.99394e-22	AT5G04080.1	unknown protein; FUNCTIONS IN: molecular_function unknown; INVOLVED IN: biological_process unknown; LOCATED IN: plasma membrane; EXPRESSED IN: 16 plant structures; EXPRESSED DURING: 9 growth stages	NA
Dca58880	17.2041	14.6893	14.7453	52.5889	107.353	104.776	2.50458	5.7026	1.64058e-21	1.28369e-19	AT5G13960.1	SUVH4, KYP, SDG33; SU(VAR)3-9 homolog 4	GO:0005694;GO:0005634;GO:0042393;GO:0008270
Dca43690	41.9498	40.2294	40.1041	142.064	268.606	277.631	2.49266	7.07982	3.80631e-21	2.90384e-19	AT2G21540.1	ATSFH3, SFH3; SEC14-like 3	GO:0005622;GO:0005215
Dca56733	6.04894	6.93866	5.7523	30.6701	43.0006	30.3319	2.46976	4.36646	2.23272e-24	2.22659e-22	AT1G66840.1	PMI2, WEB2; Plant protein of unknown function (DUF827)	NA
Dca18462	1.09981	1.40249	2.51157	5.31615	12.5295	9.88596	2.4674	2.49408	1.45744e-10	4.42099e-09	NA	NA	NA
Dca26705	8.95558	8.78404	10.5324	36.9677	41.6661	77.6647	2.46653	4.95126	7.31509e-18	4.29283e-16	AT1G53050.1	Protein kinase superfamily protein	GO:0005524;GO:0004674;GO:0005529
Dca15946	3.61365	4.87182	4.37499	20.5285	34.6229	16.0272	2.46536	3.82555	2.43086e-15	1.14475e-13	AT4G17720.1	RNA-binding (RRM/RBD/RNP motifs) family protein	GO:0003676;GO:0000166
Dca60708	14.1404	21.4065	16.5277	81.7051	106.834	99.2341	2.46476	5.82818	1.02173e-30	1.92463e-28	AT1G07440.1	NAD(P)-binding Rossmann-fold superfamily protein	GO:0000166;GO:0016491
Dca47890	17.2827	21.2589	44.8842	181.812	197.432	80.4358	2.46211	6.50253	6.90411e-11	2.14986e-09	NA	NA	GO:0005576;GO:0009405
Dca37658	9.19125	9.07931	8.10183	41.2206	65.2423	38.9447	2.46162	4.84811	1.36232e-22	1.16777e-20	AT3G52780.1	ATPAP20, PAP20; Purple acid phosphatases superfamily protein	GO:0003993;GO:0046872
Dca37658	9.19125	9.07931	8.10183	41.2206	65.2423	38.9447	2.46162	4.84811	1.36232e-22	1.16777e-20	AT3G52780.1	ATPAP20, PAP20; Purple acid phosphatases superfamily protein	GO:0003993;GO:0046872
Dca37658	9.19125	9.07931	8.10183	41.2206	65.2423	38.9447	2.46162	4.84811	1.36232e-22	1.16777e-20	AT3G52780.1	ATPAP20, PAP20; Purple acid phosphatases superfamily protein	GO:0003993;GO:0046872
Dca37658	9.19125	9.07931	8.10183	41.2206	65.2423	38.9447	2.46162	4.84811	1.36232e-22	1.16777e-20	AT3G52780.1	ATPAP20, PAP20; Purple acid phosphatases superfamily protein	GO:0003993;GO:0046872
Dca37658	9.19125	9.07931	8.10183	41.2206	65.2423	38.9447	2.46162	4.84811	1.36232e-22	1.16777e-20	AT3G52780.1	ATPAP20, PAP20; Purple acid phosphatases superfamily protein	GO:0003993;GO:0046872
Dca37658	9.19125	9.07931	8.10183	41.2206	65.2423	38.9447	2.46162	4.84811	1.36232e-22	1.16777e-20	AT3G52780.1	ATPAP20, PAP20; Purple acid phosphatases superfamily protein	GO:0003993;GO:0046872
Dca37658	9.19125	9.07931	8.10183	41.2206	65.2423	38.9447	2.46162	4.84811	1.36232e-22	1.16777e-20	AT3G52780.1	ATPAP20, PAP20; Purple acid phosphatases superfamily protein	GO:0003993;GO:0046872
Dca37658	9.19125	9.07931	8.10183	41.2206	65.2423	38.9447	2.46162	4.84811	1.36232e-22	1.16777e-20	AT3G52780.1	ATPAP20, PAP20; Purple acid phosphatases superfamily protein	GO:0003993;GO:0046872
Dca37658	9.19125	9.07931	8.10183	41.2206	65.2423	38.9447	2.46162	4.84811	1.36232e-22	1.16777e-20	AT3G52780.1	ATPAP20, PAP20; Purple acid phosphatases superfamily protein	GO:0003993;GO:0046872
Dca8643	10.4482	10.7771	11.5046	31.6515	75.3253	73.246	2.46071	5.15704	5.753e-17	3.07998e-15	AT2G32260.1	ATCCT1, CCT1; phosphorylcholine cytidylyltransferase	GO:0016779
Dca9327	12.1764	13.5821	11.5856	44.1649	62.4992	98.9345	2.45987	5.34595	1.56739e-19	1.07243e-17	AT3G17980.1	Calcium-dependent lipid-binding (CaLB domain) family protein	NA
Dca9916	19.0895	15.9441	25.8449	55.7786	105.648	173.079	2.45818	6.04622	5.68341e-13	2.17337e-11	NA	NA	NA
Dca50719	2.51385	3.54314	7.29165	16.5209	22.3158	34.2264	2.45315	3.86544	4.76652e-11	1.51201e-09	AT1G05010.1	EFE, ACO4, EAT1; ethylene-forming enzyme	GO:0016706
Dca59934	2.27817	3.02644	2.99768	16.2756	15.8658	13.3311	2.44817	3.18918	4.62705e-21	3.49503e-19	AT4G17090.1	CT-BMY, BAM3, BMY8; chloroplast beta-amylase	GO:0016161;GO:0043169;GO:0000272
Dca36290	1.88538	3.76459	3.24073	13.822	19.3503	15.2034	2.43828	3.28008	2.82661e-17	1.55138e-15	AT1G19600.1	pfkB-like carbohydrate kinase family protein	NA
Dca25490	4.39923	4.94564	9.96526	33.1237	45.7438	25.5387	2.43562	4.37728	4.01672e-14	1.73618e-12	Os03t0821900-02	Similar to Protein kinase APK1B.	GO:0005524;GO:0004674
Dca43729	1.17837	0.442893	1.05324	3.43505	5.41215	5.54213	2.42942	1.58958	3.70686e-11	1.18573e-09	AT4G38900.1	Basic-leucine zipper (bZIP) transcription factor family protein	GO:0005634;GO:0046983;GO:0043565;GO:0003700
Dca23509	3.61365	4.94564	4.61805	15.0488	26.2452	29.0587	2.4142	3.81774	2.40003e-16	1.23298e-14	AT1G70740.1	Protein kinase superfamily protein	GO:0005524;GO:0004674
Dca13703	6.1275	5.97906	6.6435	22.9003	33.5108	43.1387	2.40796	4.3142	1.78799e-19	1.20713e-17	AT1G29690.1	CAD1; MAC/Perforin domain-containing protein	GO:0016020;GO:0005215;GO:0006857
Dca51698	28.4379	24.5067	33.0555	101.743	124.479	229.849	2.4069	6.50021	9.75797e-17	5.1518e-15	AT2G35710.1	Nucleotide-diphospho-sugar transferases superfamily protein	GO:0016757
Dca9944	15.4759	18.8968	23.2523	79.6604	112.617	113.015	2.40549	5.92267	2.22114e-26	2.64767e-24	AT3G48770.1	DNA binding;ATP binding	GO:0005524
Dca1939	17.8326	15.8703	21.875	73.0357	101.793	118.482	2.40032	5.86598	4.24092e-26	4.90212e-24	AT2G17760.1	Eukaryotic aspartyl protease family protein	GO:0004190;GO:0006508
Dca52444	2.35673	2.95262	2.26851	11.5319	18.0899	10.1855	2.38693	3.012	2.67186e-15	1.25438e-13	AT1G19600.1	pfkB-like carbohydrate kinase family protein	NA
Dca19559	4.47779	6.6434	8.50693	28.2983	26.9866	47.2579	2.38454	4.35966	8.32376e-16	4.07064e-14	AT4G01950.1	ATGPAT3, GPAT3; glycerol-3-phosphate acyltransferase 3	GO:0016746
Dca4612	30.5589	30.6334	40.1041	137.729	185.348	202.213	2.37469	6.70879	7.19023e-26	7.8927e-24	AT4G24160.1	alpha/beta-Hydrolases superfamily protein	NA
Dca978	6.75596	5.97906	4.53703	19.1381	33.9557	36.5481	2.37366	4.16989	9.44898e-17	5.00599e-15	Os03t0654500-01	Domain of unknown function DUF2215 domain containing protein	NA
Dca46958	11.1552	10.9985	11.2615	35.1683	70.2097	66.5056	2.36248	5.10431	1.75178e-19	1.18794e-17	AT5G06370.1	NC domain-containing protein-related	NA
Dca32630	36.8436	38.9746	41.1573	135.275	225.902	237.488	2.35544	6.90031	9.01087e-22	7.27449e-20	Os02t0799300-01	Similar to H0306F03.12 protein	NA
Dca14089	4.085	4.65038	3.64583	15.4577	19.3503	28.5345	2.35153	3.6775	2.71245e-16	1.38881e-14	AT5G38710.1	Methylenetetrahydrofolate reductase family protein	GO:0004657;GO:0006537;GO:0006562
Dca44301	1.33548	0.885786	1.13426	4.66185	7.48804	5.01787	2.35127	1.84238	2.41117e-12	8.80305e-11	AT3G62930.1	Thioredoxin superfamily protein	GO:0009055;GO:0015035;GO:0045454
Dca33825	9.89827	10.9985	12.0717	39.3395	59.9043	68.4528	2.34643	5.0713	1.79704e-22	1.5318e-20	Os02t0799300-01	Similar to H0306F03.12 protein	NA
Dca41794	0.864135	1.10723	1.29629	4.41649	5.56043	6.66554	2.34208	1.80063	5.8346e-13	2.22561e-11	AT1G18720.1	Protein of unknown function (DUF962)	NA
Dca34731	32.9157	23.7686	23.8194	107.141	136.193	164.766	2.34165	6.35062	2.34316e-23	2.14083e-21	Os09t0533600-01	Similar to Avr9/Cf-9 induced kinase 1.	GO:0005524;GO:0004674
Dca37485	7.14875	5.16709	8.831	24.3725	33.8815	48.7558	2.34031	4.42853	9.30886e-16	4.49477e-14	AT1G02660.1	alpha/beta-Hydrolases superfamily protein	GO:0004806;GO:0006629
Dca1834	83.1926	77.2848	90.0114	288.053	432.305	547.622	2.3397	7.98446	1.60662e-18	1.00057e-16	AT4G35580.2	NTL9; NAC transcription factor-like 9	GO:0003677;GO:0006355
Dca3199	1.57115	1.32868	1.45833	5.07078	10.4536	6.51575	2.33445	2.19271	1.05863e-11	3.56567e-10	AT4G19390.1	Uncharacterised protein family (UPF0114)	NA
Dca54725	1.64971	0.811971	1.45833	7.03367	7.7846	4.94298	2.3322	2.03663	2.33257e-12	8.55537e-11	Os10t0468500-01	Serine/threonine protein kinase-related domain containing protein	GO:0016021;GO:0005524;GO:0004713
Dca39898	51.691	73.5941	117.801	427.582	457.586	337.92	2.33101	7.93381	5.31958e-15	2.45215e-13	Os05t0586200-01	Gretchen hagen 3 (GH3) family protein, Phytochrome, Jasmonate signaling	NA
Dca31275	11.2338	14.4678	13.287	39.6666	77.0304	79.3124	2.32905	5.2983	1.26207e-18	7.89204e-17	AT5G06370.1	NC domain-containing protein-related	NA
Dca48026	8.56279	9.74365	20.3356	79.824	82.146	31.7549	2.32581	5.28079	4.46132e-10	1.29906e-08	NA	NA	GO:0005576;GO:0009405
Dca17196	0.942692	0.885786	0.567128	3.18969	4.3742	4.49362	2.31534	1.36419	2.78635e-11	9.06484e-10	AT3G55430.1	O-Glycosyl hydrolases family 17 protein	GO:0043169;GO:0004553;GO:0005975
Dca61393	8.24856	6.86484	10.9375	28.8708	49.8214	50.5532	2.3117	4.70373	2.35171e-17	1.30958e-15	AT5G06370.1	NC domain-containing protein-related	NA
Dca47601	8.32712	9.37457	10.1273	37.5402	52.3422	48.3064	2.31148	4.79915	8.0079e-25	8.31187e-23	AT5G03990.1	unknown protein	NA
Dca48782	40.2215	45.618	44.8031	114.911	230.35	300.174	2.30449	7.01718	1.68459e-14	7.47193e-13	AT1G53590.1	NTMC2TYPE6.1, NTMC2T6.1; Calcium-dependent lipid-binding (CaLB domain) family protein	NA
Dca27576	5.49904	6.34813	5.91434	24.2907	30.1004	33.103	2.2985	4.14672	2.26108e-23	2.07829e-21	AT3G21630.1	CERK1, LYSM RLK1; chitin elicitor receptor kinase 1	GO:0005524;GO:0004674;GO:0016998
Dca57855	5.10625	5.53616	3.0787	19.3835	29.5815	18.4238	2.29128	3.77505	4.3364e-15	2.01722e-13	Os06t0718100-01	Similar to Alpha-expansin precursor.	GO:0005576;GO:0016020;GO:0009664
Dca57173	9.89827	11.3676	14.6643	52.4254	72.7304	50.4783	2.28944	5.14682	2.5048e-23	2.27489e-21	AT1G70480.2	Domain of unknown function (DUF220)	GO:0047134;GO:0045454
Dca57173	9.89827	11.3676	14.6643	52.4254	72.7304	50.4783	2.28944	5.14682	2.5048e-23	2.27489e-21	AT1G60420.1	DC1 domain-containing protein	GO:0047134;GO:0045454
Dca20630	190.974	197.53	224.907	699.687	1270.37	1006.8	2.27885	9.22534	3.17869e-18	1.93229e-16	AT2G27030.3	CAM5; calmodulin 5	GO:0005509
Dca42044	19.4823	17.2728	15.8796	64.448	98.8273	92.1192	2.27823	5.68689	1.75446e-26	2.12456e-24	AT2G38640.1	Protein of unknown function (DUF567)	GO:0044237
Dca41606	4.47779	3.10025	6.23841	17.5024	24.6142	24.7898	2.27814	3.76788	1.22005e-15	5.83662e-14	AT1G02400.1	ATGA2OX4, ATGA2OX6, DTA1, GA2OX6; gibberellin 2-oxidase 6	GO:0016706
Dca41650	49.5699	48.0539	63.2753	255.584	370.028	153.832	2.27624	7.29359	2.03581e-14	8.91394e-13	AT3G25780.1	AOC3; allene oxide cyclase 3	GO:0009507;GO:0046423
Dca49084	9.6626	10.0389	10.4514	31.7333	64.9458	49.28	2.27479	4.88425	9.39644e-18	5.47217e-16	Os08t0154600-01	Similar to Topoisomerase I.	GO:0005694;GO:0003918;GO:0003917;GO:0006265
Dca34939	3.84933	2.3621	3.32175	8.17869	17.2003	20.6706	2.27228	3.23931	7.35136e-11	2.28016e-09	AT3G22360.1	AOX1B; alternative oxidase 1B	GO:0016021;GO:0005740;GO:0070469;GO:0046872;GO:0016491;GO:0022900;GO:0007585
Dca34939	3.84933	2.3621	3.32175	8.17869	17.2003	20.6706	2.27228	3.23931	7.35136e-11	2.28016e-09	AT3G22360.1	AOX1B; alternative oxidase 1B	GO:0016021;GO:0005740;GO:0070469;GO:0046872;GO:0016491;GO:0022900;GO:0007585
Dca34939	3.84933	2.3621	3.32175	8.17869	17.2003	20.6706	2.27228	3.23931	7.35136e-11	2.28016e-09	AT3G22370.1	AOX1A, ATAOX1A; alternative oxidase 1A	GO:0016021;GO:0005740;GO:0070469;GO:0046872;GO:0016491;GO:0022900;GO:0007585
Dca34939	3.84933	2.3621	3.32175	8.17869	17.2003	20.6706	2.27228	3.23931	7.35136e-11	2.28016e-09	AT3G22370.1	AOX1A, ATAOX1A; alternative oxidase 1A	GO:0016021;GO:0005740;GO:0070469;GO:0046872;GO:0016491;GO:0022900;GO:0007585
Dca42591	0.314231	0.516709	0.243055	1.14502	2.00175	2.17192	2.27061	0.298705	8.55627e-07	1.60411e-05	AT4G25440.1	ZFWD1; zinc finger WD40 repeat protein 1	GO:0003676;GO:0008270
Dca60795	7.69865	7.1601	8.58794	27.4804	31.6574	51.5268	2.23859	4.4934	3.17509e-17	1.7302e-15	NA	NA	NA
Dca5217	22.3104	21.1112	28.1944	96.4267	94.2307	147.016	2.23746	6.09554	3.81625e-22	3.16458e-20	Os03t0390200-02	Serine/threonine-protein kinase SAPK1 (EC 2.7.1.37) (Osmotic stress/abscisic acid-activated protein kinase 1).	GO:0005524;GO:0004674
Dca57083	56.3259	74.1846	84.2591	225.323	424.891	353.573	2.22455	7.66728	4.96827e-16	2.47732e-14	AT2G40116.1	Phosphoinositide-specific phospholipase C family protein	GO:0005509;GO:0004435;GO:0004871;GO:0035556;GO:0006629
Dca55172	4.32067	3.24788	3.0787	16.9299	21.2038	11.6085	2.22112	3.35418	3.0611e-14	1.33446e-12	Os08t0459600-01	Similar to 12-oxophytodienoate reductase 3 (EC 1.3.1.42) (12-oxophytodienoate- 10,11-reductase 3) (OPDA-reductase 3) (LeOPR3).	GO:0010181
Dca7921	4.71346	5.31472	3.0787	11.0412	16.533	33.6273	2.21968	3.65166	5.43978e-09	1.39731e-07	AT1G30040.1	ATGA2OX2, GA2OX2; gibberellin 2-oxidase	GO:0005506
Dca26174	143.761	134.344	119.664	505.197	626.994	717.406	2.21712	8.54972	2.46127e-21	1.9063e-19	AT5G38710.1	Methylenetetrahydrofolate reductase family protein	GO:0004657;GO:0006537;GO:0006562
Dca25048	3.37798	4.2813	8.58794	25.9264	31.8798	17.6	2.21509	3.94797	5.45928e-11	1.71748e-09	AT5G02230.1	Haloacid dehalogenase-like hydrolase (HAD) superfamily protein	GO:0016787
Dca10853	8.95558	11.4414	12.8819	52.0982	60.8681	41.4162	2.21313	4.97447	9.69923e-22	7.74822e-20	AT1G75450.1	CKX5, ATCKX5, ATCKX6; cytokinin oxidase 5	GO:0019139;GO:0050660;GO:0008762;GO:0009690
Dca45785	6.20606	7.08629	7.21063	27.0714	31.2867	36.7728	2.21289	4.28101	2.55816e-22	2.14464e-20	AT1G34340.1	alpha/beta-Hydrolases superfamily protein	NA
Dca9307	44.0709	50.1945	54.7684	190.972	229.09	262.877	2.19603	7.1172	5.54047e-24	5.31676e-22	AT2G39420.1	alpha/beta-Hydrolases superfamily protein	NA
Dca40412	3.77077	4.42893	4.37499	14.2309	20.24	22.9924	2.19026	3.5663	3.0408e-16	1.54655e-14	AT2G17220.1	Protein kinase superfamily protein	GO:0005524;GO:0004674
Dca5237	1.17837	1.99302	4.05092	8.91477	14.383	9.28681	2.17446	2.76553	6.33837e-09	1.61995e-07	AT5G65500.1	U-box domain-containing protein kinase family protein	GO:0000151;GO:0005524;GO:0004672;GO:0004842
Dca23738	63.2389	59.2	80.4512	211.255	288.772	414.536	2.17244	7.5424	1.09671e-15	5.27875e-14	AT4G02330.1	ATPMEPCRB; Plant invertase/pectin methylesterase inhibitor superfamily	GO:0005618;GO:0045330;GO:0004857;GO:0030599;GO:0042545
Dca11541	4.6349	8.71023	9.80322	34.923	34.6971	34.8255	2.17241	4.42135	5.6186e-17	3.01861e-15	AT4G17090.1	CT-BMY, BAM3, BMY8; chloroplast beta-amylase	GO:0016161;GO:0043169;GO:0000272
Dca56436	1.25692	1.9192	3.64583	7.60618	9.34152	13.6306	2.16496	2.67809	2.59048e-09	6.87401e-08	AT4G13010.1	Oxidoreductase, zinc-binding dehydrogenase family protein	GO:0016491;GO:0008270
Dca15916	5.34192	5.53616	5.59027	15.5395	16.014	42.24	2.16237	3.92788	2.12752e-09	5.69505e-08	AT3G47570.1	Leucine-rich repeat protein kinase family protein	GO:0016021;GO:0005524;GO:0004674
Dca30041	16.2614	16.018	21.2268	71.8906	97.7152	69.2017	2.15844	5.61133	2.30108e-24	2.27986e-22	AT2G17220.1	Protein kinase superfamily protein	GO:0005524;GO:0004674
Dca61720	3.5351	3.76459	5.34721	14.3945	24.7624	17.2255	2.15694	3.54546	5.61191e-14	2.40201e-12	AT1G60420.1	DC1 domain-containing protein	GO:0047134;GO:0045454
Dca21438	8.64135	9.59602	10.6944	31.5697	50.3404	46.8085	2.15332	4.72519	2.83997e-19	1.89224e-17	AT5G07910.1	Leucine-rich repeat (LRR) family protein	NA
Dca30590	17.1256	19.4873	18.0671	65.5931	95.5652	82.0086	2.15229	5.63848	1.4118e-26	1.7372e-24	AT1G60030.1	ATNAT7, NAT7; nucleobase-ascorbate transporter 7	GO:0016020;GO:0005215;GO:0055085
Dca35677	27.181	25.7616	33.9467	89.2295	149.168	146.267	2.14658	6.29956	8.69517e-19	5.48227e-17	AT5G45750.1	AtRABA1c, RABA1c; RAB GTPase homolog A1C	GO:0005525;GO:0015031;GO:0007264
Dca16543	15.4759	13.8035	14.5833	34.1869	49.1542	110.768	2.14547	5.31634	3.84086e-10	1.12917e-08	AT1G44960.1	SNARE associated Golgi protein family	NA
Dca53914	24.1958	22.5137	25.6828	87.9209	127.223	104.926	2.14458	6.03521	6.60229e-26	7.40719e-24	AT1G66840.1	PMI2, WEB2; Plant protein of unknown function (DUF827)	NA
Dca25688	8.48423	6.56958	7.61572	19.6288	33.066	47.4826	2.14364	4.36837	1.25465e-12	4.66914e-11	AT4G16120.1	ATSEB1, COBL7, SEB1; COBRA-like protein-7 precursor	NA
Dca49322	36.1365	33.4384	36.4583	129.305	146.054	189.406	2.13194	6.57444	8.55807e-24	8.16119e-22	AT3G47730.1	ATATH1, ATH1, ABCA2; ATP-binding cassette A2	GO:0005524;GO:0016887
Dca20657	3.06375	2.28828	2.26851	8.58762	11.3433	13.406	2.127	2.80634	9.24859e-14	3.8556e-12	AT5G09220.1	AAP2; amino acid permease 2	GO:0016021
Dca55303	38.6504	43.9202	46.6666	139.937	194.244	229.025	2.12356	6.85278	6.1949e-20	4.31606e-18	AT2G11520.1	CRCK3; calmodulin-binding receptor-like cytoplasmic kinase 3	GO:0005524;GO:0004715;GO:0004674
Dca31693	31.1874	15.8703	18.3912	43.2652	76.3632	164.841	2.11971	5.87052	7.95643e-08	1.74675e-06	AT5G41610.1	ATCHX18, CHX18; cation/H+ exchanger 18	GO:0016021;GO:0015299
Dca28593	9.11269	11.589	9.80322	34.4323	38.7747	59.0911	2.11524	4.77117	5.00446e-17	2.70773e-15	AT5G57010.1	calmodulin-binding family protein	NA
Dca4739	2.51385	2.21447	3.0787	8.83298	9.63807	15.2783	2.11181	2.82629	3.19648e-12	1.13687e-10	NA	NA	NA
Dca27599	37.7863	35.0624	35.243	96.7538	165.108	201.614	2.10015	6.57656	3.24753e-16	1.64621e-14	AT5G66210.2	CPK28; calcium-dependent protein kinase 28	GO:0005524;GO:0005509;GO:0004674
Dca29206	12.1764	12.8439	12.7199	40.5663	47.8197	72.1975	2.08862	5.05428	3.67921e-18	2.21887e-16	Os07t0170800-01	Similar to F-box domain containing protein	NA
Dca19154	9.74115	11.5152	25.9259	45.5553	48.6352	105.975	2.08525	5.3714	3.97108e-08	9.0977e-07	AT1G03400.1	2-oxoglutarate (2OG) and Fe(II)-dependent oxygenase superfamily protein	GO:0016706
Dca244	4.79202	3.76459	5.7523	10.8777	18.0158	31.68	2.08211	3.66205	5.32387e-09	1.36984e-07	AT4G01250.1	WRKY22, AtWRKY22; WRKY family transcription factor	GO:0043565;GO:0003700
Dca51491	2.74952	2.65736	5.34721	15.2941	22.8348	7.18979	2.07514	3.24858	2.32918e-07	4.70711e-06	AT5G02230.1	Haloacid dehalogenase-like hydrolase (HAD) superfamily protein	GO:0016787
Dca10730	14.2189	16.6085	13.8541	35.9044	64.9458	87.4009	2.07422	5.28563	1.46336e-13	6.00213e-12	AT1G35460.1	basic helix-loop-helix (bHLH) DNA-binding superfamily protein	NA
Dca52842	17.4398	17.6419	18.7963	56.3511	71.989	97.8111	2.06942	5.54983	2.26864e-20	1.62511e-18	Os03t0268000-01	Similar to Protein phosphatase 1, catalytic gsmms subunit.	GO:0004721
Dca29016	52.398	56.9856	53.9582	166.763	263.416	252.541	2.06327	7.14147	3.03016e-19	2.01018e-17	AT2G37110.1	PLAC8 family protein	NA
Dca57218	38.8861	37.5721	38.9698	111.557	178.082	191.952	2.06077	6.63925	6.97887e-19	4.43681e-17	AT5G46910.1	Transcription factor jumonji (jmj) family protein / zinc finger (C5HC2 type) family protein	GO:0005634
Dca46891	1.09981	0.442893	0.48611	3.27147	2.81728	2.3966	2.05074	0.93042	6.60598e-08	1.45867e-06	AT1G31930.1	XLG3; extra-large GTP-binding protein 3	GO:0005634;GO:0005525;GO:0004871;GO:0007186;GO:0009630;GO:2000067;GO:0009737;GO:0009723;GO:0009750;GO:0009749;GO:0010555;GO:0009744;GO:0048364;GO:0009652
Dca22213	12.1764	12.0319	13.9352	25.9264	60.0526	71.823	2.04858	5.03754	4.27238e-11	1.36092e-09	AT4G28088.1	Low temperature and salt responsive protein family	GO:0016021
Dca34059	15.633	15.1322	15.7986	34.0233	66.7993	91.7447	2.04793	5.32336	2.63613e-12	9.53128e-11	Os05t0299500-01	Protein of unknown function DUF914, eukaryotic family protein	NA
Dca40832	6.04894	5.68379	7.37267	25.3539	30.6194	22.9924	2.04738	4.04502	2.3685e-18	1.4572e-16	AT5G64290.1	DCT, DIT2.1; dicarboxylate transport 2.1	GO:0016020;GO:0005215;GO:0006814;GO:0055085
Dca47139	6.28462	4.57656	3.80786	11.0412	22.5383	27.1115	2.04736	3.67147	9.98264e-10	2.76722e-08	AT1G67370.1	ASY1, ATASY1; DNA-binding HORMA family protein	NA
Dca3898	2.51385	1.32868	3.56481	5.07078	7.4139	18.0494	2.0444	2.69975	9.5206e-06	0.000154538	AT1G62440.1	LRX2; leucine-rich repeat/extensin 2	NA
Dca37609	4.94914	3.83841	3.64583	12.1045	17.4227	21.6443	2.03986	3.42944	5.96419e-13	2.26937e-11	AT1G47710.1	Serine protease inhibitor (SERPIN) family protein	GO:0004867;GO:0016740
Dca51601	69.8378	81.8614	85.3933	243.234	390.564	339.044	2.0367	7.65701	2.6123e-17	1.43893e-15	AT1G78080.1	RAP2.4; related to AP2 4	GO:0005634;GO:0003677;GO:0003700;GO:0006351
Dca2699	108.802	127.996	121.771	466.594	623.213	377.314	2.03256	8.25005	3.62303e-16	1.82443e-14	AT1G64720.1	CP5; Polyketide cyclase/dehydrase and lipid transport superfamily protein	NA
Dca47549	1.09981	0.811971	1.70139	3.43505	6.4501	4.79319	2.0256	1.68451	1.80438e-08	4.34933e-07	AT2G32020.1	Acyl-CoA N-acyltransferases (NAT) superfamily protein	GO:0008080
Dca13751	2.67096	3.61696	3.64583	10.9594	12.2329	17.2255	2.02191	3.09754	3.76101e-13	1.47521e-11	AT2G37040.1	PAL1, ATPAL1; PHE ammonia lyase 1	GO:0005737;GO:0016841;GO:0009058;GO:0006559;GO:0009698
Dca31000	92.7766	102.456	109.132	333.2	401.611	500.439	2.02089	8.00435	7.80351e-18	4.56191e-16	AT4G17230.1	SCL13; SCARECROW-like 13	GO:0006355;GO:0006351
Dca54903	34.3297	49.8993	31.03	137.32	157.175	172.031	2.01621	6.60192	6.491e-19	4.1789e-17	AT5G03760.1	ATCSLA09, CSLA09, ATCSLA9, CSLA9, RAT4; Nucleotide-diphospho-sugar transferases superfamily protein	NA
Dca4831	1.96394	2.50973	2.43055	7.85154	8.15529	11.9081	2.01114	2.57738	4.27792e-12	1.49909e-10	AT1G76140.1	Prolyl oligopeptidase family protein	GO:0004252;GO:0070008;GO:0006508
Dca25901	1.57115	2.14065	2.59259	5.72508	5.85698	13.8553	2.00973	2.4488	2.25303e-07	4.5653e-06	AT5G04080.1	unknown protein; FUNCTIONS IN: molecular_function unknown; INVOLVED IN: biological_process unknown; LOCATED IN: plasma membrane; EXPRESSED IN: 16 plant structures; EXPRESSED DURING: 9 growth stages	GO:0005886
Dca2514	15.633	19.8564	15.3125	36.8041	100.977	66.4307	2.00644	5.41585	2.64172e-11	8.61268e-10	NA	NA	GO:0004144
Dca58102	3.37798	3.46933	5.7523	12.5134	12.0105	26.063	2.00573	3.41933	6.20097e-09	1.58749e-07	NA	NA	NA
Dca10708	2.82808	2.50973	3.40277	9.24191	8.15529	17.6	2.00063	2.89819	1.80256e-09	4.85926e-08	NA	NA	NA
Dca24813	12.6478	12.1057	11.9907	32.4694	53.7508	60.8136	2.00029	4.94522	1.2394e-15	5.90962e-14	AT3G44190.1	FAD/NAD(P)-binding oxidoreductase family protein	GO:0050660;GO:0016491
Dca35652	5.34192	7.75063	10.7754	27.1532	33.7333	34.526	1.99934	4.32528	2.03891e-14	8.91394e-13	AT5G47530.1	Auxin-responsive family protein	GO:0016021
Dca33342	8.95558	8.93168	16.5277	33.778	34.3264	67.9285	1.98342	4.83675	7.10952e-10	2.01256e-08	AT1G11090.1	alpha/beta-Hydrolases superfamily protein	NA
Dca51502	64.5744	70.1247	74.4559	191.545	302.784	331.479	1.9812	7.43188	7.65648e-16	3.76847e-14	AT3G02050.1	KUP3, ATKUP3, ATKT4; K+ uptake transporter 3	GO:0016020;GO:0015079
Dca28311	7.07019	10.8509	11.1805	33.6962	38.9971	41.8656	1.97591	4.59159	1.83725e-17	1.03825e-15	Os08t0224000-01	NB-ARC domain containing protein	GO:0043531;GO:0006952
Dca23257	54.6762	53.7377	56.1457	150.324	231.017	265.648	1.9751	7.08146	1.13261e-16	5.9386e-15	Os08t0441600-01	Similar to Chorismate mutase CM2 (EC 5.4.99.5) (Chorimate mutase).	GO:0004106;GO:0009073
Dca25677	4.39923	5.31472	4.53703	17.7477	24.6142	13.7804	1.97501	3.57259	7.92416e-13	2.98535e-11	AT2G05620.1	PGR5; proton gradient regulation 5	NA
Dca17052	50.1198	51.228	62.7082	163.083	221.898	258.458	1.97169	7.0742	1.1674e-17	6.72159e-16	AT5G13160.1	PBS1; Protein kinase superfamily protein	GO:0005524;GO:0004715;GO:0004674;GO:0004872
Dca34233	17.5184	15.6489	27.1411	59.5408	75.3994	100.283	1.96435	5.62716	7.09644e-15	3.24184e-13	AT1G07630.1	PLL5; pol-like 5	GO:0003824
Dca62262	7.46298	9.37457	7.61572	20.6921	36.5505	38.1958	1.96313	4.33351	2.2307e-13	8.93334e-12	AT5G09220.1	AAP2; amino acid permease 2	GO:0016021
Dca5931	22.2318	22.809	20.6597	55.4515	95.4169	104.402	1.95777	5.74618	1.28031e-16	6.69004e-15	AT5G50530.1	CBS / octicosapeptide/Phox/Bemp1 (PB1) domains-containing protein	GO:0003824
Dca5930	10.9981	10.408	16.5277	43.5924	55.3819	48.2315	1.95726	4.95517	3.15567e-17	1.72578e-15	AT1G47480.1	alpha/beta-Hydrolases superfamily protein	GO:0016787
Dca35679	30.4804	38.827	35.0809	98.7985	128.186	176.599	1.9506	6.40663	3.76417e-16	1.88926e-14	AT1G06410.1	ATTPS7, TPS7, ATTPSA; trehalose-phosphatase/synthase 7	GO:0003824;GO:0005992
Dca57948	28.9092	28.7142	19.1203	70.9092	130.559	94.2911	1.94564	5.9603	1.22159e-14	5.46598e-13	AT4G23980.1	ARF9; auxin response factor 9	GO:0005634;GO:0003677;GO:0046983;GO:0009734;GO:0006355;GO:0006351
Dca1995	5.18481	5.60998	5.59027	25.7629	24.3176	13.1064	1.94463	3.74563	1.31871e-11	4.42105e-10	AT1G50180.1	NB-ARC domain-containing disease resistance protein	GO:0043531;GO:0006952
Dca52000	2.5924	3.69078	7.37267	16.9299	20.6848	14.9038	1.94433	3.48386	4.25032e-09	1.10479e-07	AT1G69730.1	Wall-associated kinase family protein	GO:0016021;GO:0005524;GO:0004674
Dca18529	22.4675	20.004	23.6574	53.8975	90.2272	110.094	1.94293	5.74334	3.54864e-15	1.65582e-13	AT4G09180.1	basic helix-loop-helix (bHLH) DNA-binding superfamily protein	NA
Dca49428	3.29942	4.13367	5.18517	9.73264	19.9434	18.7983	1.94168	3.37281	4.94567e-10	1.43462e-08	AT5G50460.1	secE/sec61-gamma protein transport protein	GO:0016020;GO:0015450;GO:0006605
Dca43296	9.34837	7.23392	9.56016	19.7924	41.073	39.1694	1.93667	4.40657	1.01388e-11	3.42252e-10	NA	NA	NA
Dca58729	1.17837	1.18105	2.91666	5.72508	7.7846	6.59064	1.93371	2.13418	1.72531e-08	4.17854e-07	AT2G47260.1	WRKY23, ATWRKY23; WRKY DNA-binding protein 23	GO:0043565;GO:0003700
Dca982	2.19962	2.28828	2.26851	6.05223	6.82079	12.9566	1.93154	2.48551	1.0914e-08	2.70774e-07	AT3G28210.1	PMZ, SAP12; zinc finger (AN1-like) family protein	GO:0008270
Dca14679	25.217	21.7756	26.2499	52.0164	125.369	101.706	1.93017	5.88034	1.77555e-12	6.52804e-11	Os06t0152100-01	Similar to Profilin-2.	GO:0015629;GO:0003779;GO:0030036
Dca29848	6.1275	4.35511	9.07405	17.666	22.39	34.3762	1.92991	3.98491	7.60693e-10	2.13751e-08	Os01t0878800-01	Similar to 4,5-DOPA dioxygenase extradiol.	GO:0008198;GO:0016701;GO:0008270;GO:0006725
Dca29522	9.74115	12.1057	10.3703	30.3429	44.9283	47.5575	1.92964	4.70132	3.31226e-16	1.67346e-14	AT3G62260.2	Protein phosphatase 2C family protein	GO:0008287;GO:0046872;GO:0004722;GO:0006470
Dca9266	14.2975	9.07931	10.3703	23.6364	45.4472	58.8664	1.92285	4.76185	6.08266e-10	1.72829e-08	AT2G39980.1	HXXXD-type acyl-transferase family protein	GO:0016747
Dca55153	29.2235	28.788	28.3564	77.6157	133.599	115.86	1.92097	6.11028	6.54746e-18	3.87213e-16	AT2G19450.1	TAG1, AS11, ABX45, DGAT1, RDS1, ATDGAT; membrane bound O-acyl transferase (MBOAT) family protein	GO:0016021;GO:0008374
Dca59406	33.4656	31.1501	30.2198	84.9765	124.776	148.514	1.91743	6.24209	6.24022e-17	3.32914e-15	AT4G33920.1	Protein phosphatase 2C family protein	GO:0008287;GO:0046872;GO:0004722;GO:0006470
Dca492	19.718	18.011	15.1504	47.0274	75.4735	76.9158	1.91455	5.40007	7.68111e-17	4.08357e-15	Os06t0714200-01	Similar to calcium dependent protein kinase1.	GO:0005524;GO:0005509;GO:0004683
Dca11621	151.459	174.131	146.481	426.437	675.777	676.964	1.91406	8.55223	1.03515e-14	4.68675e-13	AT1G08200.1	AXS2; UDP-D-apiose/UDP-D-xylose synthase 2	GO:0003824;GO:0050662;GO:0000166;GO:0044237
Dca39624	5.89183	4.87182	4.05092	18.811	23.2797	13.5558	1.90664	3.5735	5.327e-12	1.85146e-10	Os01t0281000-01	Cyclin-like F-box domain containing protein	NA
Dca42925	5.10625	5.90524	8.74998	23.9635	29.9522	19.9966	1.9035	3.97938	9.424e-13	3.51568e-11	Os02t0177800-02	Similar to Calmodulin-binding protein 60-B (Fragment).	NA
Dca31653	51.3767	38.3841	60.6017	113.357	164.959	283.472	1.90173	6.89323	5.68079e-10	1.62622e-08	AT5G06860.1	PGIP1, ATPGIP1; polygalacturonase inhibiting protein 1	NA
Dca55997	3.06375	4.87182	8.66896	15.1306	14.9761	31.9047	1.90114	3.7301	6.8782e-07	1.30857e-05	NA	NA	NA
Dca47150	42.3426	41.5581	53.3101	145.09	239.84	127.469	1.90093	6.76072	2.28845e-13	9.11675e-12	AT2G17120.1	LYM2; lysm domain GPI-anchored protein 2 precursor	GO:0016998
Dca39846	2.35673	2.95262	3.56481	6.78831	6.67251	19.697	1.89986	2.84345	3.69993e-06	6.36454e-05	NA	NA	GO:0043531;GO:0006952
Dca36199	27.4952	35.7267	27.4652	76.2253	113.803	147.615	1.89602	6.16124	1.71767e-14	7.5966e-13	AT3G05170.1	Phosphoglycerate mutase family protein	GO:0003824
Dca33988	19.6394	22.5875	23.9004	70.0913	97.2704	78.1141	1.89213	5.70329	9.66513e-22	7.74822e-20	AT3G51030.1	ATTRX1, ATTRX H1, TRX1; thioredoxin H-type 1	GO:0009055;GO:0015035;GO:0045454;GO:0006662
Dca26687	15.4759	13.6559	15.0694	40.2391	62.2026	61.263	1.88916	5.12203	1.06907e-17	6.17873e-16	AT5G46330.1	FLS2; Leucine-rich receptor-like protein kinase family protein	GO:0016021;GO:0005524;GO:0004674
Dca39435	1.4926	1.40249	0.48611	4.00756	4.07765	4.56851	1.88599	1.50318	2.91082e-08	6.78066e-07	Os01t0959100-01	Similar to Abscisic stress ripening protein 1.	GO:0006950
Dca59463	118.544	133.089	155.231	412.696	422.963	667.677	1.88553	8.31531	1.77854e-13	7.21729e-12	AT1G14880.1	PCR1; PLANT CADMIUM RESISTANCE 1	NA
Dca39438	15.0045	13.5821	8.50693	39.1759	63.3889	34.6009	1.88527	4.86864	2.12946e-11	6.97237e-10	AT3G01650.1	RGLG1; RING domain ligase1	GO:0008270
Dca54151	1.4926	1.62394	3.48379	5.72508	5.41215	13.1813	1.88221	2.4108	6.08431e-06	0.000101348	AT1G10550.1	XTH33, XET; xyloglucan:xyloglucosyl transferase 33	GO:0048046;GO:0005618;GO:0004553;GO:0016762;GO:0006073
Dca18840	15.0045	11.3676	12.5578	28.8708	53.306	61.263	1.88165	4.93424	6.00244e-12	2.07206e-10	AT5G10830.1	S-adenosyl-L-methionine-dependent methyltransferases superfamily protein	GO:0008168
Dca33249	5.97039	5.68379	5.67128	15.7849	23.0572	25.0145	1.88127	3.77635	1.38603e-13	5.71567e-12	Os11t0656500-01	Integrase, catalytic core domain containing protein	GO:0003676;GO:0008270;GO:0015074
Dca53522	2.98519	4.05985	5.59027	14.6398	20.24	11.5336	1.87661	3.32245	4.17777e-10	1.2235e-08	Os02t0177800-02	Similar to Calmodulin-binding protein 60-B (Fragment).	NA
Dca52313	7.69865	9.30075	9.64118	26.0082	37.3661	34.4511	1.87607	4.38647	5.64513e-16	2.80565e-14	Os07t0191600-01	Protein of unknown function DUF569 domain containing protein	NA
Dca43728	1.25692	4.2813	3.15972	10.3051	9.93463	11.7583	1.87205	2.79627	2.96437e-08	6.88437e-07	AT5G17540.1	HXXXD-type acyl-transferase family protein	GO:0016747
Dca54403	8.01289	9.5222	8.42591	26.8261	37.7368	30.3319	1.8686	4.34427	2.22945e-16	1.14922e-14	AT5G51460.3	ATTPPA; Haloacid dehalogenase-like hydrolase (HAD) superfamily protein	GO:0003824;GO:0005992
Dca29495	27.2595	14.0249	32.6504	60.6858	79.996	128.368	1.86413	5.84134	3.05899e-09	8.08908e-08	AT1G01720.1	ATAF1, ANAC002; NAC (No Apical Meristem) domain transcriptional regulator superfamily protein	GO:0003677;GO:0006355
Dca30877	25.0599	31.9621	32.0022	78.679	111.728	133.535	1.86329	6.10858	2.90885e-16	1.48439e-14	AT5G10540.1	Zincin-like metalloproteases family protein	GO:0046872;GO:0004222;GO:0006508
Dca56825	48.8629	47.4634	41.1573	120.799	151.392	227.302	1.86101	6.73251	6.94652e-14	2.94417e-12	AT4G14130.1	XTR7, XTH15; xyloglucan endotransglucosylase/hydrolase 15	GO:0048046;GO:0005618;GO:0004553;GO:0016762;GO:0006073
Dca15056	1.96394	3.46933	3.64583	8.34226	13.7157	10.9345	1.8592	2.8444	8.18489e-10	2.29568e-08	AT4G26010.1	Peroxidase superfamily protein	GO:0020037;GO:0004601;GO:0006979
Dca38408	4.16356	10.2604	11.7477	29.4433	37.5143	27.8604	1.85616	4.34551	3.38556e-09	8.89103e-08	AT1G68620.1	alpha/beta-Hydrolases superfamily protein	GO:0016787
Dca7449	23.8815	21.0374	20.0115	46.7821	101.719	86.2026	1.8538	5.64735	6.65289e-13	2.52512e-11	Os02t0729700-02	Similar to HAHB-7 (Fragment).	GO:0005634;GO:0003700;GO:0000976;GO:0006351
Dca36248	23.9601	25.3187	19.5254	57.7415	95.3428	95.1898	1.85081	5.72859	4.13268e-16	2.06742e-14	AT2G18245.1	alpha/beta-Hydrolases superfamily protein	NA
Dca47736	3.77077	3.61696	2.91666	10.8777	12.9743	13.406	1.85067	3.01665	1.08104e-13	4.49441e-12	Os02t0448600-01	Conserved hypothetical protein	NA
Dca45993	31.0303	34.398	34.1897	94.5456	137.083	127.394	1.84946	6.25951	6.77483e-19	4.34329e-17	AT3G51030.1	ATTRX1, ATTRX H1, TRX1; thioredoxin H-type 1	GO:0009055;GO:0015035;GO:0045454;GO:0006662
Dca37301	3.5351	1.47631	2.51157	8.99655	11.2691	6.81532	1.84843	2.56681	1.85084e-08	4.45427e-07	AT1G31930.1	XLG3; extra-large GTP-binding protein 3	GO:0005525;GO:0004871;GO:0007186
Dca48730	3.77077	3.46933	3.56481	10.7959	14.4571	13.4809	1.84074	3.07433	1.87769e-13	7.59943e-12	Os01t0801000-01	Similar to Apurinic endonuclease-redox protein (DNA-(apurinic or apyrimidinic site) lyase) (EC 4.2.99.18).	GO:0003677;GO:0004519;GO:0006281
Dca15895	3.06375	3.46933	4.37499	8.91477	12.9743	16.8511	1.82856	3.07819	5.01601e-10	1.45226e-08	AT4G00330.1	CRCK2; calmodulin-binding receptor-like cytoplasmic kinase 2	GO:0005524;GO:0004674
Dca11615	31.973	45.9871	54.7684	154.25	172.818	143.796	1.82674	6.65478	1.22027e-15	5.83662e-14	AT2G27830.1	unknown protein	NA
Dca43153	5.26337	7.603	5.18517	20.2831	24.2435	19.6221	1.82521	3.79348	1.45704e-13	5.99234e-12	AT1G61800.1	GPT2, ATGPT2; glucose-6-phosphate/phosphate translocator 2	GO:0016021;GO:0005215
Dca9922	18.3825	21.185	24.3055	52.0982	59.8302	114.363	1.82484	5.60094	2.95905e-11	9.5858e-10	AT5G13160.1	PBS1; Protein kinase superfamily protein	GO:0005524;GO:0004674
Dca56971	3.84933	3.46933	3.48379	10.4687	10.2312	17.6	1.82422	3.06169	2.27724e-10	6.78635e-09	AT5G19450.1	CDPK19, CPK8; calcium-dependent protein kinase 19	GO:0005524;GO:0005509;GO:0004683
Dca2870	79.3433	93.3766	64.0855	273.005	315.758	249.92	1.82408	7.48715	8.14814e-16	3.99757e-14	NA	NA	NA
Dca54833	2.82808	3.17407	3.15972	10.5505	9.63807	12.2826	1.82198	2.82763	8.32778e-13	3.12968e-11	AT5G02140.1	Pathogenesis-related thaumatin superfamily protein	NA
Dca27577	11.2338	11.5152	12.2338	33.4508	42.111	47.9319	1.81957	4.73237	1.33422e-16	6.94794e-15	Os08t0538300-01	LysM receptor-like kinase, Chitin elicitor signaling	GO:0005524;GO:0004674;GO:0004872
Dca45975	2.98519	3.46933	4.94212	10.2234	17.7192	12.0579	1.81213	3.12677	8.89018e-10	2.48437e-08	AT4G05120.1	ENT3, FUR1, ATENT3; Major facilitator superfamily protein	GO:0016020;GO:0005337
Dca37788	2.19962	2.21447	3.48379	7.93332	9.26738	10.4851	1.81112	2.60708	1.26215e-10	3.83624e-09	AT3G25070.1	RIN4; RPM1 interacting protein 4	NA
Dca1488	10.9195	10.8509	12.3148	33.4508	43.4455	42.6145	1.81006	4.68745	1.8268e-17	1.03618e-15	Os07t0191600-01	Protein of unknown function DUF569 domain containing protein	NA
Dca32745	2.12106	1.25486	1.7824	4.90721	8.30357	4.86809	1.80957	2.01325	6.32333e-08	1.41055e-06	AT1G14520.1	MIOX1; myo-inositol oxygenase 1	GO:0005737;GO:0050113;GO:0005506;GO:0019310
Dca53340	39.0432	41.1152	35.5671	112.784	176.525	115.711	1.80699	6.44232	7.03313e-16	3.47286e-14	AT1G27760.3	SAT32, ATSAT32; interferon-related developmental regulator family protein / IFRD protein family	GO:0005488
Dca6592	13.3548	9.96509	9.39813	21.5099	37.8109	54.223	1.79486	4.61807	3.21209e-09	8.45e-08	AT5G10830.1	S-adenosyl-L-methionine-dependent methyltransferases superfamily protein	GO:0008168
Dca53490	42.264	52.7781	44.7221	133.476	164.737	185.661	1.7913	6.70198	1.28909e-17	7.39436e-16	Os06t0524400-01	Protein of unknown function DUF231, plant domain containing protein	NA
Dca43730	8.56279	9.22694	12.2338	32.3058	34.5488	36.8477	1.78875	4.4886	1.34007e-16	6.95467e-15	AT4G38900.1	Basic-leucine zipper (bZIP) transcription factor family protein	GO:0005634;GO:0046983;GO:0043565;GO:0003700
Dca58539	1.88538	2.95262	2.67361	6.54295	13.864	5.54213	1.7847	2.52305	1.48849e-06	2.71019e-05	NA	NA	NA
Dca57296	19.3252	14.4678	16.7708	40.1573	71.0252	62.8358	1.78345	5.23287	6.70633e-14	2.85028e-12	AT3G08030.1	Protein of unknown function, DUF642	NA
Dca32373	132.055	142.095	124.606	357.654	483.535	529.423	1.78116	8.2049	3.46816e-14	1.50761e-12	AT3G54020.1	AtIPCS1; Arabidopsis Inositol phosphorylceramide synthase 1	NA
Dca57486	2.51385	1.62394	2.83564	6.54295	8.15529	9.21192	1.7805	2.40863	1.33905e-09	3.66152e-08	AT3G63010.1	ATGID1B, GID1B; alpha/beta-Hydrolases superfamily protein	GO:0016787
Dca8160	8.01289	8.26734	9.39813	25.2721	32.6953	30.1821	1.77942	4.25835	6.61641e-16	3.2777e-14	Os06t0684000-02	Similar to External rotenone-insensitive NADPH dehydrogenase.	GO:0005509;GO:0050660;GO:0016491
Dca20417	15.4759	19.4873	15.7986	49.6446	77.9201	46.5839	1.77757	5.23481	3.89669e-14	1.68908e-12	Os10t0561400-02	Similar to Transcription factor MYBS3.	GO:0005634;GO:0003677;GO:0008270;GO:0006355
Dca41053	10.2125	8.85786	11.6666	28.7072	35.5867	40.4426	1.76952	4.50752	2.89788e-15	1.35631e-13	AT2G01100.1	unknown protein	NA
Dca23081	10.0554	11.3676	11.5856	27.4804	37.5143	47.4826	1.76843	4.61002	1.58767e-13	6.4712e-12	AT5G57010.1	calmodulin-binding family protein	NA
Dca49153	13.0406	15.7965	12.0717	32.9601	35.3643	70.7745	1.76463	4.91534	1.0067e-09	2.78266e-08	AT4G16120.1	ATSEB1, COBL7, SEB1; COBRA-like protein-7 precursor	NA
Dca59909	5.10625	6.71721	7.29165	16.6027	24.3917	23.966	1.76436	3.82611	4.82042e-12	1.68307e-10	AT1G16670.1	Protein kinase superfamily protein	GO:0005524;GO:0004715;GO:0004674
Dca53491	15.0045	20.5207	19.2824	53.0797	69.839	62.9107	1.76091	5.33182	4.89734e-18	2.93034e-16	AT4G01070.1	GT72B1, UGT72B1; UDP-Glycosyltransferase superfamily protein	GO:0016758
Dca23495	19.011	19.9302	20.5787	43.1017	81.9978	76.5413	1.76039	5.44974	2.02485e-13	8.15175e-12	AT5G51020.1	CRL; crumpled leaf	GO:0017009
Dca43187	10.4482	22.1447	16.4467	42.1202	79.5512	44.1873	1.75684	5.16968	3.69088e-09	9.65959e-08	AT1G05010.1	EFE, ACO4, EAT1; ethylene-forming enzyme	GO:0016706
Dca14506	86.0992	122.681	127.847	320.359	416.661	399.108	1.75484	7.94034	3.26862e-13	1.2887e-11	AT5G20420.1	CHR42	GO:0005524;GO:0003677;GO:0004386
Dca8125	2.43529	4.35511	3.56481	6.37937	8.45185	20.0715	1.74995	2.94867	1.18668e-05	0.000190593	NA	NA	NA
Dca8015	16.1043	11.9581	7.45369	28.2165	46.6334	44.6366	1.74929	4.70101	1.26135e-09	3.46146e-08	AT4G32890.1	GATA9; GATA transcription factor 9	GO:0005634;GO:0043565;GO:0003700;GO:0008270;GO:0045893
Dca52850	5.81327	7.23392	7.0486	10.3051	28.3211	28.6094	1.74176	3.88169	3.51596e-07	6.98523e-06	Os02t0268100-01	Similar to Glutelin (Fragment).	GO:0045735
Dca46675	2.74952	2.3621	5.50925	10.9594	10.676	13.7804	1.74036	2.96896	2.10068e-08	5.01599e-07	AT3G11820.1	SYP121, AT-SYR1, ATSYP121, SYR1, ATSYR1, PEN1; syntaxin of plants 121	GO:0016020;GO:0005484;GO:0006886;GO:0016192
Dca36124	21.9962	23.3257	21.956	63.6302	71.0993	89.7226	1.73784	5.6085	3.41736e-19	2.2475e-17	AT3G05990.1	Leucine-rich repeat (LRR) family protein	NA
Dca3920	9.89827	11.589	11.2615	29.3615	42.9265	36.3983	1.73011	4.56942	6.1911e-15	2.8453e-13	AT2G01100.1	unknown protein	NA
Dca42155	19.7965	18.8968	19.5254	51.1986	75.3253	66.5805	1.72986	5.39431	1.69889e-17	9.67224e-16	AT5G35700.1	FIM2, FIM5; fimbrin-like protein 2	GO:0005509
Dca25418	1.41404	1.40249	1.70139	4.58006	6.0794	4.34383	1.72883	1.77153	1.59507e-08	3.88159e-07	AT5G53130.1	CNGC1, ATCNGC1; cyclic nucleotide gated channel 1	GO:0016021;GO:0005216
Dca53221	23.096	21.2589	24.7916	48.1725	100.607	79.9115	1.72595	5.6386	3.10234e-12	1.10737e-10	Os02t0729700-02	Similar to HAHB-7 (Fragment).	GO:0005634;GO:0003700;GO:0000976;GO:0006351
Dca24924	17.5184	17.8634	14.9884	45.8824	71.8407	48.6809	1.72339	5.18191	6.69049e-15	3.06557e-13	AT5G66130.1	ATRAD17, RAD17; RADIATION SENSITIVE 17	GO:0005634;GO:0007049;GO:0006281
Dca57275	43.1282	55.5093	68.1364	132.658	169.037	248.947	1.72325	6.90379	7.50609e-11	2.32308e-09	Os08t0372900-02	Similar to Rhodopsin (Fragment).	NA
Dca10392	12.6478	9.07931	20.0115	48.745	46.4852	42.3898	1.72235	4.90906	6.18504e-11	1.93781e-09	Os03t0693650-00	Hypothetical gene	GO:0016758
Dca10392	12.6478	9.07931	20.0115	48.745	46.4852	42.3898	1.72235	4.90906	6.18504e-11	1.93781e-09	AT4G15550.1	IAGLU; indole-3-acetate beta-D-glucosyltransferase	GO:0016758
Dca56674	5.42048	6.2005	8.99304	15.5395	18.4606	34.0017	1.72235	3.90108	6.57292e-08	1.45347e-06	AT4G06536.1	SPla/RYanodine receptor (SPRY) domain-containing protein	NA
Dca38010	139.99	179.815	172.326	499.881	570.203	553.09	1.72163	8.46236	7.3064e-15	3.32779e-13	Os03t0402800-01	Tify domain containing protein	NA
Dca47828	24.7457	27.5332	29.7337	69.6824	97.7894	102.305	1.71791	5.87782	2.54504e-17	1.40696e-15	AT1G68660.1	Ribosomal protein L12/ ATP-dependent Clp protease adaptor protein ClpS family protein	GO:0030163
Dca55335	6.1275	10.9247	11.2615	24.4543	34.9195	33.777	1.71729	4.35156	1.05518e-10	3.21357e-09	AT2G39220.1	PLP6, PLA IIB; PATATIN-like protein 6	GO:0016787;GO:0006629
Dca28315	22.2318	23.1781	21.7939	56.7601	72.9528	89.6477	1.70646	5.58293	1.11696e-16	5.87673e-15	Os05t0380300-01	Similar to NBS-LRR protein (Fragment).	GO:0043531;GO:0006952
Dca14707	61.9035	38.3102	55.9027	114.992	149.39	242.431	1.699	6.79	2.1711e-09	5.8015e-08	AT3G24550.1	ATPERK1, PERK1; proline extensin-like receptor kinase 1	GO:0005524;GO:0004674
Dca26169	2.19962	0.959602	1.86342	4.3347	6.4501	5.46724	1.69776	1.89048	2.12176e-07	4.31651e-06	NA	NA	NA
Dca9350	6.83452	9.66983	13.449	35.3319	37.5885	24.0409	1.69446	4.41328	5.34757e-10	1.54241e-08	Os06t0288300-01	C-glucosyltransferase, Flavone-C-glycoside synthesis	GO:0016758
Dca26663	26.3954	27.6808	62.1411	87.0212	64.7234	224.232	1.69391	6.36105	5.93956e-05	0.000840684	AT1G68050.1	ADO3, FKF1; flavin-binding, kelch repeat, f box 1	GO:0004871;GO:0006355
Dca43726	1.64971	4.35511	3.40277	12.1045	8.74841	9.73617	1.69382	2.76991	9.60282e-08	2.06949e-06	AT5G17540.1	HXXXD-type acyl-transferase family protein	GO:0016747
Dca29773	56.4044	55.7307	53.5531	153.596	205.439	176.899	1.69348	6.87167	1.56579e-16	8.09857e-15	AT1G10370.1	GST30, ATGSTU17, GST30B, ERD9; Glutathione S-transferase family protein	GO:0016740
Dca15904	16.8899	16.8299	16.9328	37.0494	56.8646	69.5762	1.69048	5.16454	6.90634e-13	2.61481e-11	AT2G45880.1	BMY4, BAM7; beta-amylase 7	GO:0016161;GO:0043169;GO:0000272
Dca27449	1.57115	3.24788	2.02546	5.97044	7.26562	8.98724	1.69045	2.32575	8.18168e-08	1.78848e-06	Os08t0224000-01	NB-ARC domain containing protein	GO:0043531;GO:0006952
Dca17021	8.79846	10.5556	9.39813	18.9746	27.4314	46.4341	1.69034	4.35355	1.73626e-08	4.1984e-07	AT4G16120.1	ATSEB1, COBL7, SEB1; COBRA-like protein-7 precursor	NA
Dca56370	3.61365	3.98604	2.99768	6.29759	13.2709	14.6792	1.68998	2.93596	1.9548e-07	4.00353e-06	AT4G03510.1	RMA1, ATRMA1; RING membrane-anchor 1	GO:0008270
Dca46681	75.3368	77.5063	93.5762	193.508	206.106	392.518	1.68463	7.43682	1.68977e-09	4.57136e-08	Os03t0649000-01	Conserved hypothetical protein	NA
Dca13982	20.9749	18.6015	23.3333	54.9608	71.6183	75.1932	1.68192	5.46863	4.25267e-17	2.30915e-15	AT1G12420.1	ACR8; ACT domain repeat 8	GO:0016597;GO:0008152
Dca10739	6.75596	5.60998	4.8611	12.677	20.9813	21.5694	1.67989	3.61466	9.40382e-10	2.6231e-08	AT5G65160.1	TPR14; tetratricopeptide repeat (TPR)-containing protein	GO:0005488;GO:0045454
Dca31893	24.5886	22.8828	21.875	56.9237	70.2838	94.8903	1.67917	5.60719	4.35157e-15	2.01812e-13	AT3G18110.1	EMB1270; Pentatricopeptide repeat (PPR) superfamily protein	GO:0005488;GO:0004553;GO:0005975
Dca41835	11.2338	10.0389	14.9884	23.3093	31.1384	61.5626	1.67819	4.67542	1.97006e-07	4.02938e-06	AT3G19970.1	alpha/beta-Hydrolases superfamily protein	NA
Dca20045	78.4006	88.5786	71.3772	165.373	291.663	305.267	1.67712	7.38333	6.80456e-11	2.12319e-09	AT1G30360.1	ERD4; Early-responsive to dehydration stress protein (ERD4)	GO:0016020
Dca43563	11.3123	11.4414	13.287	31.2426	42.0368	41.8656	1.67606	4.66481	1.21824e-14	5.46598e-13	AT3G48770.1	DNA binding;ATP binding	GO:0005524
Dca8589	5.65615	5.53616	12.2338	22.9003	33.2884	18.5736	1.67545	4.04653	2.56272e-07	5.15858e-06	AT3G28580.1	P-loop containing nucleoside triphosphate hydrolases superfamily protein	GO:0005524;GO:0017111
Dca23178	6.04894	6.86484	6.23841	18.3203	21.5003	21.4196	1.67524	3.76171	1.94177e-13	7.83798e-12	AT4G18700.1	CIPK12, SnRK3.9, ATWL4, WL4; CBL-interacting protein kinase 12	GO:0005524;GO:0004674;GO:0007165
Dca40167	78.4791	109.321	94.7915	313.325	341.855	245.501	1.67209	7.62478	4.70142e-13	1.81147e-11	AT1G77760.1	NIA1, GNR1, NR1; nitrate reductase 1	GO:0009055;GO:0050660;GO:0020037;GO:0030151;GO:0043546;GO:0046857;GO:0042128
Dca36309	20.7392	26.8688	23.0902	42.202	62.7958	119.605	1.6673	5.6264	4.72724e-08	1.07815e-06	AT5G20270.1	HHP1; heptahelical transmembrane protein1	GO:0016021;GO:0004872
Dca36391	5.34192	4.50275	6.40045	14.6398	15.7916	21.12	1.66705	3.51885	9.49211e-11	2.90242e-09	Os04t0508800-01	Similar to Retroelement pol polyprotein-like.	GO:0008270
Dca59828	20.6607	29.6	18.1481	56.1058	109.948	51.2273	1.66643	5.57872	7.62388e-09	1.91956e-07	AT3G63200.1	PLP9, PLA IIIB; PATATIN-like protein 9	GO:0016787;GO:0006629
Dca37463	4.085	2.50973	4.05092	7.52439	7.48804	18.7234	1.66453	2.91918	9.98973e-06	0.000161465	AT2G03220.1	FT1, ATFUT1, ATFT1, MUR2; fucosyltransferase 1	GO:0016020;GO:0008107;GO:0042546
Dca32673	98.5114	109.468	121.609	273.332	278.911	490.853	1.66211	7.83889	3.14027e-10	9.24985e-09	AT5G09410.3	EICBP.B; ethylene induced calmodulin binding protein	GO:0005634;GO:0003677
Dca43	6.83452	7.67681	9.88424	25.1086	27.1349	24.1158	1.64632	4.08336	2.25652e-13	9.0131e-12	Os06t0527100-01	Similar to Cyclic nucleotide-gated channel A (Fragment).	GO:0016021;GO:0005216
Dca47125	9.58404	8.41497	11.0995	31.4879	34.0298	25.4638	1.64485	4.33416	2.93361e-13	1.16565e-11	Os03t0154100-01	Aromatic-ring hydroxylase family protein	GO:0016491
Dca35428	2.43529	3.76459	3.15972	7.11546	9.71221	12.5072	1.64468	2.72672	3.02163e-08	7.00502e-07	NA	NA	NA
Dca2603	44.0709	71.232	59.6295	123.253	230.869	192.027	1.6423	6.91121	5.57786e-10	1.60579e-08	AT3G15810.1	Protein of unknown function (DUF567)	NA
Dca11614	12.4907	13.8773	18.7152	43.1017	55.0853	42.4647	1.6419	4.9597	2.15082e-13	8.63613e-12	Os04t0406600-01	Prephenate dehydratase domain containing protein	GO:0004664;GO:0009094
Dca40048	6.20606	4.20748	5.18517	15.9484	16.3106	16.4017	1.64143	3.44208	1.08825e-11	3.65737e-10	AT5G66850.1	MAPKKK5; mitogen-activated protein kinase kinase kinase 5	GO:0005524;GO:0004672
Dca44016	3.37798	2.50973	3.24073	7.03367	11.1209	10.2604	1.6395	2.68357	7.07335e-09	1.7898e-07	Os01t0309800-01	Similar to Hydrogenase expression/formation protein hypB.	GO:0046872;GO:0030001
Dca62607	12.8049	12.6963	10.6944	26.1718	37.8109	48.8307	1.63946	4.64442	5.49363e-11	1.72473e-09	AT1G07040.1	unknown protein; INVOLVED IN: biological_process unknown; LOCATED IN: chloroplast; EXPRESSED IN: 24 plant structures; EXPRESSED DURING: 14 growth stages	NA
Dca57412	46.2705	49.8255	68.0554	137.075	164.959	208.729	1.63779	6.81574	3.77324e-12	1.33578e-10	AT1G76140.1	Prolyl oligopeptidase family protein	GO:0004252;GO:0070008;GO:0006508
Dca26145	76.4366	56.026	69.1086	139.283	241.767	241.981	1.62815	7.10443	8.84533e-11	2.72101e-09	AT5G16120.2	alpha/beta-Hydrolases superfamily protein	NA
Dca11113	10.6053	8.78404	9.07405	18.5656	29.3591	39.9183	1.62588	4.28982	3.73995e-09	9.75456e-08	AT2G45880.1	BMY4, BAM7; beta-amylase 7	GO:0016161;GO:0043169;GO:0000272
Dca40421	12.6478	15.7227	16.1226	40.6481	43.5937	52.4256	1.61856	4.92403	1.50037e-14	6.67425e-13	AT2G43500.1	Plant regulator RWP-RK family protein	NA
Dca39611	14.5332	17.7157	15.3125	35.5773	51.3783	59.0911	1.618	5.0198	1.26893e-12	4.71077e-11	NA	NA	NA
Dca470	5.49904	9.89128	10.4514	20.1196	24.6883	34.4511	1.61616	4.14462	1.1486e-08	2.8404e-07	AT5G19440.1	NAD(P)-binding Rossmann-fold superfamily protein	GO:0003824;GO:0050662;GO:0000166;GO:0044237
Dca50562	14.7688	15.1322	15.7986	37.8673	41.7403	60.0647	1.61165	4.95713	8.5016e-13	3.18716e-11	Os05t0380300-01	Similar to NBS-LRR protein (Fragment).	GO:0043531;GO:0006952
Dca61264	52.0052	45.3965	34.5138	104.033	221.231	77.0656	1.60855	6.47924	9.57182e-07	1.78541e-05	AT5G11720.1	Glycosyl hydrolases family 31 protein	GO:0030246;GO:0004553;GO:0005975
Dca36203	18.7753	19.0444	19.6064	38.0309	60.7199	76.3166	1.6082	5.28263	3.4838e-11	1.11907e-09	AT1G08860.1	BON3; Calcium-dependent phospholipid-binding Copine family protein	NA
Dca19075	77.7721	88.2095	81.9906	212.564	273.795	263.626	1.59658	7.37934	4.795e-14	2.0609e-12	AT1G02130.1	ATRAB1B, ARA5, ARA-5, ATRABD2A, RABD2A, RA-5; RAS 5	GO:0005525;GO:0015031;GO:0007264
Dca5704	9.42692	9.44838	8.91202	17.666	32.0281	34.3013	1.59567	4.23322	2.28982e-09	6.09739e-08	AT3G55350.1	PIF / Ping-Pong family of plant transposases	NA
Dca8389	1.57115	2.06683	2.51157	5.07078	7.7846	5.69192	1.59166	2.09768	1.90293e-07	3.91306e-06	AT3G63010.1	ATGID1B, GID1B; alpha/beta-Hydrolases superfamily protein	GO:0016787
Dca23994	2.5924	2.06683	1.94444	4.00756	5.70871	10.1855	1.58975	2.19787	8.76927e-06	0.000143256	AT5G08350.1	GRAM domain-containing protein / ABA-responsive protein-related	NA
Dca20890	12.255	9.74365	9.47915	20.5285	34.104	39.9183	1.58678	4.40464	1.93823e-09	5.21578e-08	Os05t0393800-01	Protein of unknown function DUF221 domain containing protein	GO:0016020
Dca34234	2.82808	4.79801	6.6435	9.65085	10.8984	22.2434	1.58421	3.27494	1.60461e-05	0.000252664	AT3G46540.1	ENTH/VHS family protein	NA
Dca5303	67.6382	57.6499	59.7915	139.528	187.053	228.351	1.58419	6.94845	2.98837e-12	1.07286e-10	AT1G18150.2	ATMPK8; Protein kinase superfamily protein	GO:0005524;GO:0004707
Dca18805	23.0174	25.614	21.5509	83.5862	86.8168	40.143	1.58412	5.55281	1.51813e-09	4.12899e-08	Os03t0858700-01	Protein of unknown function DUF1499 family protein	NA
Dca54191	1.88538	5.38853	6.48147	9.56906	16.8296	14.8289	1.58266	3.22273	1.9109e-05	0.000297515	AT5G51190.1	Integrase-type DNA-binding superfamily protein	GO:0005634;GO:0003677;GO:0003700;GO:0006351
Dca26939	9.97683	13.5082	13.125	28.789	42.5558	38.3456	1.58264	4.6179	5.42546e-12	1.8814e-10	Os09t0392100-01	Lipase, class 3 family protein	GO:0004806;GO:0006629
Dca53215	3.22087	4.57656	5.34721	12.4316	17.6451	9.28681	1.58118	3.15599	1.4619e-07	3.05139e-06	AT4G10780.1	LRR and NB-ARC domains-containing disease resistance protein	GO:0043531;GO:0006952
Dca56390	7.14875	5.83142	6.6435	14.5581	24.3176	19.6221	1.5763	3.7214	9.99303e-10	2.76722e-08	AT4G35730.1	Regulator of Vps4 activity in the MVB pathway protein	NA
Dca40164	41.0071	38.4579	41.4004	83.3408	143.533	132.487	1.57214	6.32576	8.6004e-12	2.94226e-10	AT4G08180.1	ORP1C; OSBP(oxysterol binding protein)-related protein 1C	NA
Dca208	41.3214	42.4439	44.074	101.007	123.812	155.105	1.57137	6.40594	1.09048e-13	4.52133e-12	AT1G27200.1	Domain of unknown function (DUF23)	NA
Dca47127	36.6864	42.4439	44.317	89.0659	144.052	133.386	1.56995	6.3546	3.7689e-12	1.33578e-10	Os09t0394900-01	Similar to Annexin-like protein	GO:0005509;GO:0005544
Dca2140	47.2132	46.8728	53.148	114.992	128.779	193.301	1.56981	6.60812	5.98648e-12	2.07124e-10	AT5G54650.1	Fh5, ATFH5; formin homology5	GO:0003779;GO:0030036
Dca8124	327.507	314.823	353.807	714.654	848.225	1394	1.56966	9.36415	6.49563e-09	1.65736e-07	AT4G28365.1	ENODL3, AtENODL3; early nodulin-like protein 3	GO:0005507;GO:0009055
Dca43981	3.84933	4.05985	7.21063	12.1045	16.7554	15.8026	1.56472	3.34015	4.11749e-08	9.419e-07	AT1G65820.3	microsomal glutathione s-transferase, putative	GO:0016740
Dca20888	18.1468	25.3187	24.0624	53.4068	71.989	74.0698	1.56224	5.48122	8.88944e-14	3.72624e-12	Os06t0311600-01	Similar to Mannan endo-1,4-beta-mannosidase 6.	GO:0043169;GO:0004553;GO:0005975
Dca53392	6.59885	8.04589	9.15507	19.2199	21.0555	29.9575	1.561	3.98534	5.70142e-10	1.62907e-08	AT3G57120.1	Protein kinase superfamily protein	GO:0005524;GO:0004672
Dca35918	16.8113	16.1656	18.7963	40.3209	53.8991	58.417	1.56023	5.09748	8.80026e-14	3.69902e-12	AT3G48240.1	Octicosapeptide/Phox/Bem1p family protein	NA
Dca520	6.6774	5.46235	5.18517	13.4948	19.4986	18.0494	1.55838	3.53144	4.32593e-10	1.26205e-08	AT5G24560.1	AtPP2-B12, PP2-B12; phloem protein 2-B12	NA
Dca58310	245.807	243.222	143.24	444.839	568.72	848.695	1.55836	8.7002	1.14115e-07	2.41415e-06	NA	NA	NA
Dca32743	2.19962	1.10723	3.64583	5.07078	9.26738	6.06639	1.55807	2.23916	4.65747e-05	0.000677442	AT1G14520.1	MIOX1; myo-inositol oxygenase 1	GO:0005737;GO:0050113;GO:0005506;GO:0019310
Dca33556	21.839	20.004	19.3634	39.0941	63.982	77.1405	1.55801	5.33677	9.29619e-11	2.84822e-09	AT1G07040.1	unknown protein; INVOLVED IN: biological_process unknown; LOCATED IN: chloroplast; EXPRESSED IN: 24 plant structures; EXPRESSED DURING: 14 growth stages	NA
Dca30025	8.32712	7.45537	8.74998	15.7849	20.7589	35.5745	1.55591	4.02509	1.06016e-07	2.26236e-06	AT2G04305.1	Magnesium transporter CorA-like family protein	GO:0016020;GO:0046873
Dca24129	21.0535	34.6195	54.6064	106.405	103.202	113.913	1.5528	6.17905	2.10429e-08	5.01675e-07	AT3G45970.1	ATEXLA1, EXPL1, ATEXPL1, ATHEXP BETA 2.1, EXLA1; expansin-like A1	GO:0005576;GO:0019953
Dca56581	9.42692	15.206	15.5555	30.5883	45.6696	41.6409	1.5523	4.72895	5.63106e-10	1.61806e-08	AT1G64405.1	unknown protein	NA
Dca9353	8.17	7.23392	8.26387	24.4543	24.9849	19.5472	1.54279	3.96335	9.05587e-12	3.09115e-10	NA	NA	NA
Dca3689	31.8944	38.015	35.162	83.5044	89.5599	132.337	1.53908	6.09974	1.6108e-12	5.951e-11	Os05t0380300-01	Similar to NBS-LRR protein (Fragment).	GO:0043531;GO:0006952
Dca6413	1.72827	1.84539	2.34953	4.66185	4.3742	8.16341	1.53678	2.0056	3.51963e-06	6.08871e-05	NA	NA	GO:0005524;GO:0004715;GO:0004674
Dca28207	27.4952	29.3048	33.0555	71.8906	72.4338	116.01	1.53473	5.87114	3.98351e-12	1.4037e-10	Os07t0568600-01	Similar to Calcium-dependent protein kinase.	GO:0005524;GO:0005509;GO:0004674
Dca38962	9.97683	14.9845	13.125	30.9154	41.8886	37.5966	1.53437	4.63906	1.41637e-11	4.69805e-10	AT4G27270.1	Quinone reductase family protein	GO:0010181;GO:0016491;GO:0045892
Dca50700	2.67096	2.73117	3.72684	7.85154	7.93288	10.6349	1.53351	2.60526	2.29372e-08	5.41758e-07	AT1G17080.1	Ribosomal protein L18ae family	GO:0005840;GO:0003735;GO:0006412
Dca57560	9.19125	8.34115	9.56016	21.5917	24.021	32.8034	1.5335	4.14978	5.33725e-11	1.68604e-09	AT2G23320.1	WRKY15; WRKY DNA-binding protein 15	GO:0043565;GO:0003700
Dca36125	8.01289	10.8509	19.4444	25.8446	48.6352	35.7243	1.52525	4.63935	1.49492e-06	2.71865e-05	AT5G26340.1	MSS1, STP13, ATSTP13; Major facilitator superfamily protein	GO:0016021;GO:0032440;GO:0022891;GO:0008643
Dca19498	5.5776	7.82444	9.47915	23.8818	26.9125	15.0536	1.5241	3.90151	6.5647e-08	1.45347e-06	AT4G27280.1	Calcium-binding EF-hand family protein	GO:0005509
Dca20712	20.8963	20.3731	24.7916	48.9085	57.5319	83.5064	1.52404	5.42076	1.4388e-11	4.76208e-10	AT3G05580.1	Calcineurin-like metallo-phosphoesterase superfamily protein	GO:0004721
Dca47084	78.9505	82.009	98.1942	194.816	258.968	291.037	1.52315	7.388	1.94102e-11	6.38277e-10	AT5G57710.1	Double Clp-N motif-containing P-loop nucleoside triphosphate hydrolases superfamily protein	NA
Dca145	43.3639	36.0958	31.7592	92.5827	128.261	98.4852	1.52146	6.16843	3.15608e-13	1.25079e-11	AT5G59480.1	Haloacid dehalogenase-like hydrolase (HAD) superfamily protein	GO:0016787
Dca23389	2.19962	4.05985	3.88888	6.05223	9.56393	13.5558	1.52144	2.74985	7.1189e-06	0.000117809	NA	NA	NA
Dca36049	41.7141	50.6374	48.53	117.119	163.032	123.2	1.51739	6.50578	4.298e-13	1.66444e-11	AT5G13020.1	Emsy N Terminus (ENT)/ plant Tudor-like domains-containing protein	NA
Dca41810	2.98519	4.05985	4.21295	9.24191	10.8984	11.983	1.51109	2.88641	4.4032e-09	1.14259e-07	AT5G03720.1	AT-HSFA3, HSFA3; heat shock transcription factor A3	GO:0005634;GO:0043565;GO:0003700
Dca53321	13.8262	15.4274	18.3101	31.9787	48.6352	54.5226	1.50686	4.9365	2.80284e-10	8.33639e-09	Os06t0684000-02	Similar to External rotenone-insensitive NADPH dehydrogenase.	GO:0005509;GO:0050660;GO:0016491
Dca29288	41.4785	62.9646	59.7105	129.305	152.652	183.04	1.50199	6.71462	4.94934e-11	1.56674e-09	AT3G27870.1	ATPase E1-E2 type family protein / haloacid dehalogenase-like hydrolase family protein	GO:0016021;GO:0005524;GO:0015662;GO:0000287;GO:0004012;GO:0006812
Dca42781	64.653	60.1596	54.1203	131.922	185.422	189.256	1.50135	6.83828	4.09417e-12	1.43937e-10	AT5G09960.1	FUNCTIONS IN: molecular_function unknown; INVOLVED IN: biological_process unknown; LOCATED IN: plasma membrane; EXPRESSED IN: 22 plant structures; EXPRESSED DURING: 13 growth stages; CONTAINS InterPro DOMAIN/s: RPM1-interacting protein 4, defence response (InterPro:IPR008700)	NA
Dca33649	14.0618	14.6155	10.4514	26.4989	38.1075	46.2094	1.50093	4.65337	1.52732e-09	4.14661e-08	AT5G20270.1	HHP1; heptahelical transmembrane protein1	GO:0016021;GO:0004872
Dca22664	4.79202	6.27432	4.53703	10.3051	15.4951	18.4238	1.50061	3.34267	6.55405e-08	1.45347e-06	AT2G16600.1	ROC3; rotamase CYP 3	GO:0003755;GO:0006457
Dca19563	6.6774	4.50275	7.9398	10.7141	16.4589	26.6621	1.4949	3.62411	7.53035e-06	0.000124214	AT2G47260.1	WRKY23, ATWRKY23; WRKY DNA-binding protein 23	GO:0043565;GO:0003700
Dca55826	11.1552	8.5626	7.77776	16.4392	28.3211	32.5787	1.49192	4.14142	6.52584e-08	1.44936e-06	Os03t0221500-03	Glycoside hydrolase, family 17 protein	GO:0043169;GO:0042973;GO:0005975
Dca31444	7.22731	6.05287	6.96758	15.4577	19.1279	22.3183	1.4912	3.70313	7.49566e-10	2.11012e-08	AT1G17080.1	Ribosomal protein L18ae family	GO:0005840;GO:0003735;GO:0006412
Dca47128	67.3239	68.0579	64.5716	137.157	219.97	204.46	1.48982	6.98979	3.24317e-11	1.0484e-09	Os09t0394900-01	Similar to Annexin-like protein	GO:0005509;GO:0005544
Dca37928	186.103	181.881	132.546	390.369	507.556	506.206	1.48806	8.31113	2.8437e-10	8.44149e-09	AT1G19180.1	JAZ1, TIFY10A; jasmonate-zim-domain protein 1	NA
Dca28448	32.9157	30.9287	31.3541	57.4144	93.2669	115.711	1.48463	5.91746	6.79313e-10	1.92657e-08	AT3G03990.1	alpha/beta-Hydrolases superfamily protein	NA
Dca54990	2.0425	2.43591	2.26851	5.72508	6.4501	6.74043	1.48321	2.15017	3.50549e-08	8.07958e-07	AT5G19440.1	NAD(P)-binding Rossmann-fold superfamily protein	GO:0003824;GO:0050662;GO:0000166;GO:0044237
Dca57866	3.69221	8.11971	4.53703	13.6584	20.6848	11.4587	1.48193	3.39627	4.88258e-06	8.23187e-05	AT3G51240.1	F3H, TT6, F3'H; flavanone 3-hydroxylase	GO:0016706
Dca14170	10.2125	8.71023	6.40045	20.3649	22.4641	27.9353	1.48104	4.01624	1.63159e-09	4.42181e-08	AT4G32030.1	unknown protein	NA
Dca31108	13.669	13.6559	14.0162	33.6144	34.104	47.4077	1.47731	4.71382	1.37465e-11	4.57887e-10	Os06t0693100-01	NB-ARC domain containing protein	GO:0043531;GO:0006952
Dca12823	37.6291	54.0329	50.2314	114.992	134.636	144.395	1.47322	6.4836	2.61852e-12	9.5127e-11	AT2G39770.1	CYT1, VTC1, SOZ1, EMB101, GMP1; Glucose-1-phosphate adenylyltransferase family protein	GO:0004475;GO:0009058
Dca26717	35.351	14.9845	15.8796	51.9347	61.5354	70.1005	1.47115	5.38528	4.70115e-07	9.20798e-06	AT1G12990.1	beta-1,4-N-acetylglucosaminyltransferase family protein	GO:0016020;GO:0003830;GO:0006487
Dca29276	70.9376	78.2444	68.5415	156.785	226.865	219.813	1.47066	7.09842	9.69544e-12	3.2874e-10	AT5G04870.1	CPK1, ATCPK1; calcium dependent protein kinase 1	GO:0005524;GO:0005509;GO:0004674
Dca52374	5.65615	5.75761	5.67128	14.3127	14.9019	18.1243	1.46913	3.44626	4.28152e-10	1.25148e-08	AT5G53050.2	alpha/beta-Hydrolases superfamily protein	GO:0003824
Dca23113	19.3252	19.9302	26.331	42.611	71.5442	67.2545	1.46837	5.36939	3.02458e-10	8.9436e-09	Os01t0270100-01	Similar to Cysteine protease inhibitor.	GO:0004869
Dca12859	20.1893	17.8634	18.9583	36.5587	51.4525	69.2766	1.46431	5.16547	5.73651e-10	1.63603e-08	AT2G29050.1	ATRBL1, RBL1; RHOMBOID-like 1	GO:0016021;GO:0004252;GO:0006508
Dca42638	13.9047	14.6155	14.5023	35.6591	43.3713	39.5438	1.46228	4.76008	5.37254e-13	2.05965e-11	AT4G01370.1	ATMPK4, MPK4; MAP kinase 4	GO:0005524;GO:0004707
Dca8162	13.5119	21.9232	17.743	52.8343	63.3147	30.4817	1.46214	5.06444	8.94594e-08	1.93613e-06	AT2G20900.1	DGK5, ATDGK5; diacylglycerol kinase 5	GO:0004143;GO:0007205
Dca8162	13.5119	21.9232	17.743	52.8343	63.3147	30.4817	1.46214	5.06444	8.94594e-08	1.93613e-06	AT2G20900.1	DGK5, ATDGK5; diacylglycerol kinase 5	GO:0004143;GO:0007205
Dca8162	13.5119	21.9232	17.743	52.8343	63.3147	30.4817	1.46214	5.06444	8.94594e-08	1.93613e-06	AT2G20900.1	DGK5, ATDGK5; diacylglycerol kinase 5	GO:0004143;GO:0007205
Dca8162	13.5119	21.9232	17.743	52.8343	63.3147	30.4817	1.46214	5.06444	8.94594e-08	1.93613e-06	AT2G20900.1	DGK5, ATDGK5; diacylglycerol kinase 5	GO:0004143;GO:0007205
Dca17056	27.2595	39.6389	16.2847	88.4116	94.0824	46.8085	1.4617	5.70714	2.53392e-06	4.49565e-05	AT5G13220.1	JAZ10, TIFY9, JAS1; jasmonate-zim-domain protein 10	NA
Dca12073	5.42048	3.98604	3.0787	8.75119	11.2691	14.3796	1.46058	2.99683	3.92446e-07	7.74636e-06	AT4G25440.1	ZFWD1; zinc finger WD40 repeat protein 1	GO:0016905;GO:0003676;GO:0008270
Dca27717	14.2189	20.4469	16.6898	37.9491	65.4648	37.8213	1.45877	5.01217	9.2164e-09	2.30531e-07	AT5G36110.1	CYP716A1; cytochrome P450, family 716, subfamily A, polypeptide 1	GO:0009055;GO:0020037;GO:0050598
Dca43208	50.5126	48.0539	46.6666	106.486	126.778	165.74	1.45799	6.50582	9.42598e-12	3.20315e-10	AT1G80460.1	NHO1, GLI1; Actin-like ATPase superfamily protein	GO:0004370;GO:0006072
Dca32111	22.7817	21.0374	19.6875	43.8378	62.7216	67.629	1.45564	5.31424	3.81909e-12	1.34888e-10	AT5G50150.1	Protein of Unknown Function (DUF239)	NA
Dca9914	6.83452	11.2938	11.0995	22.0825	24.3917	33.6273	1.45362	4.20076	2.15591e-08	5.12382e-07	AT5G41120.1	Esterase/lipase/thioesterase family protein	GO:0016747
Dca18725	4.39923	5.16709	5.50925	13.3313	16.6813	11.234	1.45081	3.25518	1.2074e-08	2.97618e-07	AT1G60010.1	unknown protein; FUNCTIONS IN: molecular_function unknown; INVOLVED IN: N-terminal protein myristoylation; LOCATED IN: cellular_component unknown; EXPRESSED IN: 22 plant structures; EXPRESSED DURING: 13 growth stages	NA
Dca46700	21.9176	29.5262	31.4351	59.459	71.1735	95.5643	1.44846	5.69158	6.65884e-11	2.08198e-09	AT5G40990.1	GLIP1; GDSL lipase 1	GO:0016788;GO:0006629
Dca19611	12.962	14.0249	13.368	33.5326	35.4385	40.8919	1.44425	4.65535	9.12075e-13	3.41089e-11	AT3G05170.1	Phosphoglycerate mutase family protein	GO:0003824
Dca48405	3.92788	3.91222	3.80786	6.8701	12.0847	12.7319	1.44355	2.88642	5.78517e-07	1.11734e-05	NA	NA	NA
Dca6520	28.2022	33.7337	26.8981	56.7601	112.543	72.0477	1.44165	5.78681	3.18427e-09	8.3913e-08	AT5G36110.1	CYP716A1; cytochrome P450, family 716, subfamily A, polypeptide 1	GO:0009055;GO:0020037;GO:0050598
Dca8763	4.47779	7.08629	10.8565	20.5285	28.1728	12.0579	1.43816	3.8095	3.88633e-05	0.000574033	AT5G28237.1	Pyridoxal-5'-phosphate-dependent enzyme family protein	GO:0032440;GO:0030170;GO:0004834
Dca39265	5.42048	4.87182	7.37267	13.7402	14.9019	19.023	1.43349	3.46589	2.85533e-08	6.67176e-07	AT5G54310.1	NEV, AGD5; ARF-GAP domain 5	GO:0008060;GO:0008270;GO:0032312
Dca41592	10.2125	10.408	12.7199	26.4172	28.9884	34.4511	1.43075	4.37126	7.35248e-11	2.28016e-09	Os01t0609300-01	Similar to Pleiotropic drug resistance protein	GO:0016020;GO:0005524;GO:0015416;GO:0015417
Dca33996	26.0026	33.7337	27.7893	65.9202	84.815	84.5549	1.42612	5.75414	1.59045e-13	6.4712e-12	AT2G21410.1	VHA-A2; vacuolar proton ATPase A2	GO:0033177;GO:0015078;GO:0015991
Dca32674	17.2827	16.0918	23.8194	38.9305	51.0818	62.9856	1.42042	5.13746	1.08052e-09	2.98128e-08	AT3G22370.1	AOX1A, ATAOX1A; alternative oxidase 1A	GO:0016021;GO:0005740;GO:0070469;GO:0046872;GO:0016491;GO:0022900;GO:0007585
Dca20656	68.6594	67.8364	58.7383	151.142	203.141	165.964	1.41385	6.89984	9.77641e-12	3.3075e-10	Os04t0463500-01	Similar to Anthranilate synthase beta chain.	GO:0008152
Dca60379	4.24212	4.05985	5.83332	10.9594	14.7537	11.9081	1.41372	3.1355	4.82866e-08	1.09964e-06	AT3G16565.2	alanine-tRNA ligases;nucleic acid binding;ligases, forming aminoacyl-tRNA and related compounds;nucleotide binding;ATP binding	GO:0005737;GO:0004813;GO:0005524;GO:0003676;GO:0006419
Dca55687	15.5544	16.6823	22.118	28.6254	57.1612	58.8664	1.41269	5.05936	1.91921e-07	3.93593e-06	Os03t0687000-01	Similar to predicted protein	GO:0016020;GO:0005215;GO:0006857
Dca57847	96.8616	102.677	138.541	225.895	262.749	411.391	1.41268	7.69014	1.13383e-07	2.40277e-06	AT1G76160.1	sks5; SKU5 similar 5	GO:0005507;GO:0016491
Dca12091	66.8526	59.4215	102.245	129.06	156.582	322.192	1.41149	7.12477	1.29432e-05	0.000206146	AT4G33790.1	CER4, G7, FAR3; Jojoba acyl CoA reductase-related male sterility protein	GO:0000166
Dca43492	42.6568	41.7058	45.3703	88.4934	113.136	143.272	1.41074	6.3088	9.67243e-11	2.95164e-09	AT4G38900.1	Basic-leucine zipper (bZIP) transcription factor family protein	GO:0005634;GO:0046983;GO:0043565;GO:0003700
Dca16606	1.57115	3.17407	2.99768	5.39793	5.78284	9.4366	1.40941	2.2905	2.41286e-05	0.000370376	Os03t0244200-02	Similar to Thaumatin-like protein	NA
Dca55507	419.734	410.562	345.786	885.097	1234.34	1004.02	1.40913	9.48535	1.44478e-09	3.94354e-08	Os03t0438100-02	Similar to Allene oxide cyclase precursor (EC 5.3.99.6) (Allene oxide cylase).	GO:0009507;GO:0046423
Dca3130	5.81327	3.24788	6.48147	13.6584	15.5692	11.983	1.40896	3.26508	4.54108e-07	8.92884e-06	AT3G63290.1	2-oxoglutarate (2OG) and Fe(II)-dependent oxygenase superfamily protein	NA
Dca29911	35.5866	33.9551	37.6735	90.8652	107.65	85.8281	1.40716	6.03168	4.67582e-14	2.01536e-12	AT4G36820.1	Protein of unknown function (DUF607)	NA
Dca17618	11.0766	9.74365	12.2338	24.8632	33.1401	29.4332	1.40419	4.33957	1.80175e-10	5.39041e-09	AT5G65140.1	TPPJ; Haloacid dehalogenase-like hydrolase (HAD) superfamily protein	GO:0004805;GO:0005992
Dca3105	35.1938	41.3367	41.8865	82.7683	99.717	130.764	1.4034	6.1722	3.86728e-11	1.23446e-09	AT1G06780.2	GAUT6; galacturonosyltransferase 6	GO:0016757
Dca44976	6.28462	6.56958	5.26619	11.6955	15.7916	20.1464	1.39305	3.47634	1.40229e-07	2.93099e-06	AT1G43770.2	RING/FYVE/PHD zinc finger superfamily protein	GO:0008270
Dca56879	3.29942	3.76459	2.75462	8.50583	7.63632	9.73617	1.39264	2.61117	7.99323e-08	1.75231e-06	AT1G76690.1	OPR2, ATOPR2; 12-oxophytodienoate reductase 2	GO:0010181;GO:0016491
Dca9787	7.14875	6.2005	5.83332	10.4687	17.1261	22.6928	1.39031	3.55486	1.83368e-06	3.30322e-05	AT3G20640.1	basic helix-loop-helix (bHLH) DNA-binding superfamily protein	NA
Dca49209	1.57115	1.84539	2.51157	3.18969	5.63457	6.66554	1.38746	1.90185	4.31879e-05	0.000631795	AT4G03490.2	Ankyrin repeat family protein	NA
Dca41591	48.313	50.7851	59.0624	115.647	134.636	163.268	1.38679	6.57669	1.95235e-11	6.40624e-10	Os01t0609900-02	Similar to PDR-like ABC transporter (PDR4 ABC transporter).	GO:0016020;GO:0005524;GO:0016887
Dca55483	16.8113	14.9845	20.4976	33.4508	50.2663	52.8	1.38523	4.98356	1.99994e-09	5.37236e-08	Os02t0592400-01	Hypoxia induced protein conserved region family protein	GO:0016021
Dca9913	1.96394	1.62394	0.97222	3.59862	4.22592	4.11915	1.38074	1.54218	1.07038e-05	0.000172641	AT5G41120.1	Esterase/lipase/thioesterase family protein	GO:0016747
Dca9636	9.50548	7.75063	7.61572	17.9931	22.0934	24.64	1.3797	3.91636	3.41674e-09	8.95749e-08	AT3G12620.1	Protein phosphatase 2C family protein	GO:0008287;GO:0046872;GO:0004722;GO:0006470
Dca10988	5.26337	6.05287	5.42823	11.8591	13.5674	18.1243	1.37764	3.35272	5.47242e-08	1.23335e-06	AT1G11330.2	S-locus lectin protein kinase family protein	GO:0005524;GO:0004674;GO:0005529;GO:0048544
Dca7399	37.6291	35.2838	42.9397	69.9278	83.184	147.84	1.3774	6.12181	1.3157e-07	2.75754e-06	AT3G07360.1	PUB9, ATPUB9; plant U-box 9	GO:0000151;GO:0005488;GO:0004842
Dca21977	41.0071	44.4369	38.3217	77.2886	106.241	137.879	1.37666	6.21664	1.33826e-09	3.66152e-08	Os07t0614300-01	Similar to Von Willebrand factor type A domain containing protein, expressed.	NA
Dca7696	8.32712	6.6434	7.37267	13.4948	16.7554	27.7107	1.37552	3.76058	1.69004e-06	3.05891e-05	AT4G24240.1	WRKY7, ATWRKY7; WRKY DNA-binding protein 7	GO:0043565;GO:0003700
Dca43837	27.0238	27.6808	28.5995	57.7415	72.8045	85.1541	1.37267	5.64392	1.71705e-12	6.32818e-11	NA	NA	NA
Dca45772	10.6838	12.6963	10.8565	26.9079	27.2832	34.526	1.37244	4.36852	3.05247e-10	9.00864e-09	Os03t0703400-01	Similar to MAP3K beta 3 protein kinase (EC 2.7.1.37) (Fragment).	GO:0005524;GO:0004709
Dca25056	26.7882	32.9955	33.4606	70.5003	89.5599	81.1098	1.37086	5.80482	3.88524e-13	1.51614e-11	AT5G55060.1	unknown protein; FUNCTIONS IN: molecular_function unknown; INVOLVED IN: biological_process unknown; LOCATED IN: cellular_component unknown; EXPRESSED IN: 25 plant structures; EXPRESSED DURING: 15 growth stages	NA
Dca38063	188.617	171.621	172.974	338.434	439.422	599.374	1.36899	8.3155	3.26153e-08	7.52866e-07	AT4G34710.1	ADC2, SPE2, ATADC2; arginine decarboxylase 2	GO:0008792;GO:0006527;GO:0008295
Dca38063	188.617	171.621	172.974	338.434	439.422	599.374	1.36899	8.3155	3.26153e-08	7.52866e-07	Os06t0131350-00	Hypothetical gene	GO:0008792;GO:0006527;GO:0008295
Dca19282	14.6117	14.0249	19.0393	25.4357	38.5523	59.0911	1.36881	4.83956	1.55844e-06	2.8308e-05	AT1G12710.1	AtPP2-A12, PP2-A12; phloem protein 2-A12	NA
Dca16792	13.5119	21.2589	26.493	57.0054	58.1991	42.9141	1.36767	5.19845	2.57674e-08	6.03004e-07	AT5G63450.1	CYP94B1; cytochrome P450, family 94, subfamily B, polypeptide 1	GO:0070330;GO:0009055;GO:0020037
Dca3253	9.19125	10.6294	10.0463	18.9746	38.9971	18.9481	1.36444	4.16758	2.33609e-06	4.15916e-05	AT3G53990.1	Adenine nucleotide alpha hydrolases-like superfamily protein	GO:0006950
Dca53760	108.331	95.8863	85.6364	215.917	282.025	246.026	1.35985	7.43021	2.86247e-10	8.48069e-09	Os09t0558900-01	Similar to NADPH-cytochrome P450 reductase (Fragment).	GO:0005789;GO:0010181;GO:0005506;GO:0003958
Dca22200	53.1836	64.1457	79.2359	123.089	153.913	227.302	1.35937	6.87014	1.08069e-07	2.29975e-06	AT4G30440.1	GAE1; UDP-D-glucuronate 4-epimerase 1	GO:0050662;GO:0000166;GO:0016857;GO:0005975;GO:0044237
Dca8941	1.88538	3.69078	3.9699	7.19724	6.59837	10.7098	1.35775	2.54523	2.36835e-05	0.000364278	AT3G12145.1	FLR1, FLOR1; Leucine-rich repeat (LRR) family protein	NA
Dca5877	16.1829	14.8369	14.0162	30.4247	49.4507	35.3498	1.35523	4.74846	5.28464e-09	1.36435e-07	AT3G20660.1	AtOCT4, 4-Oct; organic cation/carnitine transporter4	GO:0016021;GO:0022857
Dca469	1.57115	2.43591	3.40277	4.989	6.15354	7.78894	1.35392	2.18673	2.13748e-05	0.000330768	AT5G19440.1	NAD(P)-binding Rossmann-fold superfamily protein	GO:0003824;GO:0050662;GO:0000166;GO:0044237
Dca54988	1.80683	3.24788	3.32175	7.27903	6.22768	7.93873	1.35211	2.35839	3.12677e-06	5.44615e-05	AT5G19440.1	NAD(P)-binding Rossmann-fold superfamily protein	GO:0003824;GO:0050662;GO:0000166;GO:0044237
Dca18390	57.2686	57.5023	56.6318	118.427	150.057	169.035	1.35195	6.66754	2.62912e-11	8.58996e-10	AT5G49960.1	unknown protein; CONTAINS InterPro DOMAIN/s: Protein of unknown function DUF1012 (InterPro:IPR010420)	GO:0000166
Dca29912	15.0831	17.7895	27.6273	38.1127	56.4939	59.3907	1.34864	5.1666	1.04579e-07	2.23666e-06	AT1G19300.1	GATL1, PARVUS, GLZ1, ATGATL1; Nucleotide-diphospho-sugar transferases superfamily protein	GO:0016757
Dca38046	59.6253	69.7556	36.1342	105.341	224.567	89.6477	1.34161	6.61016	4.70187e-05	0.000682599	AT4G29010.1	AIM1; Enoyl-CoA hydratase/isomerase family	GO:0003857;GO:0050662;GO:0000166
Dca56880	5.02769	5.31472	6.23841	14.0673	15.1244	12.7319	1.33774	3.30867	1.36065e-08	3.32704e-07	AT1G76690.1	OPR2, ATOPR2; 12-oxophytodienoate reductase 2	GO:0010181;GO:0016491
Dca53890	215.877	204.986	189.421	409.589	572.205	559.381	1.33646	8.48682	3.73694e-09	9.75456e-08	AT5G54940.1	Translation initiation factor SUI1 family protein	GO:0003743
Dca47823	71.0162	72.1177	96.4118	150.324	176.97	275.534	1.33156	7.13508	1.78383e-07	3.69304e-06	AT1G71110.1	unknown protein; FUNCTIONS IN: molecular_function unknown; INVOLVED IN: biological_process unknown; LOCATED IN: endomembrane system	NA
Dca52768	27.1024	21.7756	18.1481	31.1608	75.2511	62.2366	1.33124	5.30234	2.72416e-06	4.81079e-05	AT5G62310.1	IRE; AGC (cAMP-dependent, cGMP-dependent and protein kinase C) kinase family protein	GO:0005524;GO:0004674
Dca53659	18.7753	21.5541	15.6365	45.3099	53.306	42.24	1.33032	5.04299	8.65007e-11	2.66632e-09	AT1G61800.1	GPT2, ATGPT2; glucose-6-phosphate/phosphate translocator 2	GO:0016021;GO:0005215
Dca254	71.7232	71.5272	90.4975	145.826	145.387	295.53	1.32783	7.09715	1.90565e-06	3.42076e-05	AT5G24010.1	Protein kinase superfamily protein	NA
Dca53551	10.6838	10.6294	6.6435	15.6213	17.1261	37.4468	1.32694	4.04728	6.41846e-05	0.000901775	Os12t0623600-01	Protein of unknown function DUF1637 family protein	GO:0047800
Dca41704	11.3123	10.4818	14.7453	28.4618	30.5453	32.5787	1.32657	4.42716	7.47292e-10	2.11012e-08	Os01t0194300-01	Similar to NPR1.	NA
Dca49820	13.5905	10.7771	10.5324	23.1457	32.7694	31.6051	1.32651	4.36257	8.27558e-09	2.07679e-07	Os03t0703400-01	Similar to MAP3K beta 3 protein kinase (EC 2.7.1.37) (Fragment).	GO:0005524;GO:0004709
Dca53154	4.16356	3.10025	4.45601	7.03367	11.7881	10.4851	1.32477	2.80816	3.06844e-06	5.35885e-05	NA	NA	NA
Dca17191	20.9749	21.185	15.9606	32.9601	64.5751	48.0068	1.32397	5.09258	1.2487e-07	2.62837e-06	AT5G15948.1	CPuORF10; conserved peptide upstream open reading frame 10	NA
Dca41382	11.7051	8.11971	13.125	18.1567	34.6971	29.5081	1.32318	4.27715	1.6048e-06	2.91155e-05	AT3G16500.1	PAP1, IAA26; phytochrome-associated protein 1	GO:0005634;GO:0046983;GO:0009734;GO:0006355;GO:0006351
Dca13613	10.1339	14.9107	17.743	29.934	32.3988	44.6366	1.32195	4.651	1.48144e-07	3.08795e-06	AT4G21510.1	F-box family protein	NA
Dca48000	20.3464	19.8564	17.9051	37.0494	49.6731	58.1924	1.31827	5.08778	7.49427e-10	2.11012e-08	NA	NA	GO:0006353
Dca62449	7.38442	9.15312	12.0717	27.235	22.6865	21.2698	1.31478	4.06904	3.87778e-08	8.89732e-07	AT4G31940.1	CYP82C4; cytochrome P450, family 82, subfamily C, polypeptide 4	GO:0009055;GO:0020037;GO:0004497;GO:0016705
Dca59373	325.386	326.338	373.9	707.702	874.841	967.551	1.31406	9.21946	6.56566e-09	1.66965e-07	Os08t0564100-01	Similar to ATP-binding cassette, sub-family F, member 2 (Iron inhibited ABC transporter 2) (HUSSY-18).	GO:0005524;GO:0015439
Dca49069	38.179	40.9676	46.5045	91.0288	120.328	99.983	1.3092	6.18976	1.85786e-11	6.1225e-10	AT5G64460.2	Phosphoglycerate mutase family protein	NA
Dca26496	48.3915	53.2948	65.5438	103.951	148.649	161.096	1.30692	6.59977	4.82223e-09	1.24708e-07	AT5G18900.1	2-oxoglutarate (2OG) and Fe(II)-dependent oxygenase superfamily protein	GO:0005506;GO:0031418;GO:0016706
Dca9740	12.6478	4.87182	7.53471	16.5209	20.1658	25.2392	1.30637	3.87375	3.35545e-05	0.000500954	Os03t0149300-01	Protein of unknown function DUF6, transmembrane domain containing protein	GO:0016020
Dca8530	59.3111	58.5357	64.4096	116.137	161.475	172.405	1.30412	6.72176	9.66402e-10	2.69076e-08	AT3G14050.1	RSH2, AT-RSH2, ATRSH2; RELA/SPOT homolog 2	GO:0003824;GO:0015969
Dca60440	6.28462	5.01945	4.61805	10.7141	11.8622	16.7013	1.30197	3.22727	1.00194e-06	1.86207e-05	NA	NA	NA
Dca19140	7.22731	7.89826	9.80322	21.1828	16.6071	23.4417	1.29612	3.85948	8.15343e-08	1.78486e-06	AT5G25150.1	TAF5; TBP-associated factor 5	GO:0005634;GO:0006355
Dca43853	2.74952	3.69078	2.43055	6.13401	6.82079	8.83745	1.29123	2.3995	5.66846e-06	9.48349e-05	AT5G53110.1	RING/U-box superfamily protein	GO:0008270
Dca27420	3.84933	4.2813	4.05092	7.68796	10.7502	11.3838	1.29091	2.84147	6.67994e-07	1.27403e-05	AT3G21070.1	NADK1, ATNADK-1; NAD kinase 1	GO:0003951
Dca21970	92.3053	68.796	78.5878	136.42	200.472	249.321	1.29037	7.10666	1.53176e-07	3.18847e-06	AT2G05920.1	Subtilase family protein	GO:0005576;GO:0042802;GO:0004252;GO:0043086;GO:0006508
Dca48568	122.707	98.027	117.315	204.712	233.464	388.473	1.2901	7.60203	8.28354e-07	1.55845e-05	AT3G48990.1	AMP-dependent synthetase and ligase family protein	GO:0003824
Dca20964	34.8796	32.8479	40.9143	60.9312	110.69	93.5422	1.28769	5.96516	2.27549e-08	5.38286e-07	Os01t0270100-01	Similar to Cysteine protease inhibitor.	GO:0004869
Dca11195	3.45654	2.73117	3.15972	7.60618	8.67427	6.51575	1.28536	2.46325	1.21419e-06	2.22402e-05	AT5G47390.1	myb-like transcription factor family protein	GO:0003677;GO:0008270;GO:0006355
Dca43651	65.4386	77.1372	57.8471	167.663	196.839	123.799	1.28439	6.84485	1.88846e-08	4.53765e-07	Os01t0560000-01	Similar to Auxin amidohydrolase.	NA
Dca47595	47.2917	46.1347	71.1341	104.033	111.95	184.089	1.28187	6.55872	8.0688e-07	1.52368e-05	NA	NA	NA
Dca47584	33.8584	39.9342	40.5092	93.0734	98.0859	86.8017	1.28179	6.03423	2.96855e-12	1.06826e-10	AT5G05140.1	Transcription elongation factor (TFIIS) family protein	GO:0005634;GO:0003677;GO:0006351
Dca24827	18.8538	18.823	11.2615	24.0453	47.5231	47.3328	1.2801	4.81525	9.11277e-06	0.000148233	AT5G03610.1	GDSL-like Lipase/Acylhydrolase superfamily protein	GO:0016788;GO:0006629
Dca4750	42.264	54.1068	36.1342	102.315	144.571	74.8937	1.27954	6.24567	4.67019e-07	9.17089e-06	Os08t0531600-01	Similar to Squamosa-promoter binding-like protein	GO:0005634;GO:0003677
Dca24574	9.97683	10.2604	17.581	24.2089	35.5126	31.9796	1.27919	4.44296	8.55779e-07	1.60411e-05	AT4G03420.1	Protein of unknown function (DUF789)	NA
Dca23666	39.3574	44.9536	39.4559	77.4522	91.71	131.139	1.27862	6.14666	6.619e-09	1.68041e-07	Os09t0425900-02	Similar to Senescence-associated protein 5.	GO:0016021
Dca46320	48.0773	48.8659	50.7175	99.0439	130.262	128.742	1.27792	6.40006	1.55813e-10	4.71707e-09	AT2G24330.1	Protein of unknown function (DUF2296)	NA
Dca18977	62.689	66.7292	70.567	108.531	115.879	259.731	1.27553	6.83534	1.86852e-05	0.000292109	AT5G20190.1	Tetratricopeptide repeat (TPR)-like superfamily protein	GO:0005488
Dca40607	8.64135	6.79103	8.58794	18.1567	20.6106	19.3226	1.27477	3.79123	1.66862e-08	4.04767e-07	Os01t0110500-01	Protein kinase, core domain containing protein	GO:0005524;GO:0004709
Dca5243	14.1404	14.394	13.5301	26.6625	31.6574	43.4383	1.27427	4.59327	2.35695e-08	5.54975e-07	NA	NA	GO:0003723
Dca22531	20.8178	24.802	20.7407	45.8006	49.3766	65.3822	1.27411	5.24743	4.11263e-10	1.20674e-08	AT1G63300.1	Myosin heavy chain-related protein	NA
Dca30465	6.6774	5.83142	6.96758	12.677	20.1658	14.2298	1.274	3.49276	6.43266e-07	1.23303e-05	AT1G27760.3	SAT32, ATSAT32; interferon-related developmental regulator family protein / IFRD protein family	GO:0005488
Dca53734	56.5615	58.831	54.5253	112.212	151.837	146.567	1.27289	6.59878	1.62318e-10	4.89456e-09	AT3G59360.1	UTR6, ATUTR6; UDP-galactose transporter 6	GO:0000139;GO:0016021;GO:0005351
Dca37987	11.3909	12.4748	11.9097	23.391	36.6988	26.2128	1.27022	4.35859	5.02648e-08	1.14128e-06	AT5G50460.1	secE/sec61-gamma protein transport protein	GO:0016020;GO:0015450;GO:0006605
Dca59098	34.6439	30.6334	32.0022	63.3848	84.5185	86.5022	1.26901	5.79307	2.86706e-11	9.30758e-10	Os05t0115800-01	Similar to MAP kinase phosphatase (Fragment).	GO:0008138;GO:0006470
Dca29872	15.633	12.4748	25.0347	34.923	38.1816	54.8222	1.26842	4.92307	3.28815e-06	5.7207e-05	AT2G18700.1	ATTPS11, TPS11, ATTPSB; trehalose phosphatase/synthase 11	GO:0003824;GO:0005992
Dca9369	47.4489	46.2823	45.0462	98.7167	100.014	135.558	1.26823	6.30393	4.88526e-10	1.4198e-08	AT5G04930.1	ALA1; aminophospholipid ATPase 1	GO:0016021;GO:0005524;GO:0015662;GO:0000287;GO:0004012;GO:0006754;GO:0006812
Dca8602	47.9202	40.5985	46.6666	93.3188	124.628	107.248	1.26657	6.26481	1.68273e-10	5.06411e-09	AT1G52380.1	NUP50 (Nucleoporin 50 kDa) protein	GO:0005643;GO:0046907
Dca52488	63.2389	69.1651	69.2707	135.439	173.93	174.802	1.26347	6.83889	5.1326e-10	1.4832e-08	AT3G52190.1	PHF1; phosphate transporter traffic facilitator1	NA
Dca21976	45.0136	45.7656	53.3101	85.1401	123.145	136.831	1.26032	6.35234	1.32036e-08	3.23372e-07	AT1G19110.1	inter-alpha-trypsin inhibitor heavy chain-related	NA
Dca16693	7.77721	7.01247	7.29165	17.8295	19.8693	15.2034	1.25974	3.6617	5.86568e-08	1.31229e-06	AT5G01320.1	Thiamine pyrophosphate dependent pyruvate decarboxylase family protein	GO:0016831;GO:0000287;GO:0030976
Dca34242	13.3548	7.82444	11.1805	26.9897	31.8056	18.5736	1.25794	4.20498	2.62637e-06	4.65426e-05	Os11t0703900-01	Heat shock protein 70.	GO:0005524
Dca52900	2.35673	1.99302	3.48379	5.80687	5.85698	6.96511	1.25266	2.19104	1.26202e-05	0.000201633	NA	NA	GO:0043531;GO:0006952
Dca253	24.9028	29.8215	30.2198	51.9347	62.5733	87.7754	1.2518	5.58617	8.47567e-09	2.12351e-07	AT4G01370.1	ATMPK4, MPK4; MAP kinase 4	GO:0005524;GO:0004707
Dca7464	24.1958	19.7826	31.2731	38.5216	71.1735	69.2766	1.25075	5.4108	9.36949e-07	1.74981e-05	Os08t0398300-01	ABC transporter-like domain containing protein	GO:0005524;GO:0016887
Dca1849	13.8262	21.5541	22.9282	45.0646	55.0112	38.6451	1.25003	5.04437	8.69626e-08	1.88745e-06	AT4G16146.1	cAMP-regulated phosphoprotein 19-related protein	NA
Dca38219	55.6974	59.6429	64.0855	113.029	132.783	180.494	1.24855	6.65997	9.66165e-09	2.40878e-07	AT5G21990.1	TPR7; Tetratricopeptide repeat (TPR)-like superfamily protein	GO:0005488
Dca39607	58.5255	58.0928	51.6897	114.174	140.493	144.994	1.24756	6.56725	1.73754e-10	5.21877e-09	AT1G50460.1	HKL1, ATHKL1; hexokinase-like 1	GO:0005524;GO:0004396;GO:0006096
Dca54887	37.472	32.1097	45.1272	94.2185	117.436	60.4392	1.24626	6.01397	3.77752e-07	7.48538e-06	AT3G19830.1	NTMC2TYPE5.2, NTMC2T5.2; Calcium-dependent lipid-binding (CaLB domain) family protein	GO:0016020
Dca19298	126.556	172.064	137.488	308.336	478.123	247.299	1.24505	7.9375	3.90761e-06	6.69913e-05	AT3G61260.1	Remorin family protein	NA
Dca17005	6.28462	4.94564	7.53471	10.7959	15.4951	18.0494	1.24266	3.41722	4.60427e-06	7.78847e-05	Os03t0645966-00	Hypothetical gene	GO:0016702
Dca17005	6.28462	4.94564	7.53471	10.7959	15.4951	18.0494	1.24266	3.41722	4.60427e-06	7.78847e-05	AT1G78390.1	NCED9, ATNCED9; nine-cis-epoxycarotenoid dioxygenase 9	GO:0016702
Dca19236	38.8075	39.8604	62.8702	82.4411	101.422	150.986	1.24262	6.31404	2.74315e-06	4.83313e-05	AT4G24240.1	WRKY7, ATWRKY7; WRKY DNA-binding protein 7	GO:0043565;GO:0003700
Dca33641	5.18481	4.65038	5.26619	8.0969	12.0105	15.5779	1.24158	3.10988	8.16024e-06	0.000134025	AT5G20400.1	2-oxoglutarate (2OG) and Fe(II)-dependent oxygenase superfamily protein	GO:0016706
Dca43829	71.1733	78.4659	81.1804	139.201	174.301	231.721	1.2401	7.01692	4.92013e-08	1.1188e-06	AT1G64060.1	ATRBOH F, ATRBOHF, RBOHAP108, RBOHF, RBOH F; respiratory burst oxidase protein F	GO:0016021;GO:0005509;GO:0009055;GO:0050660;GO:0005506;GO:0016174;GO:0004601
Dca25209	8.32712	9.22694	10.9375	17.5024	21.1296	28.4596	1.23608	4.00867	6.23402e-07	1.19797e-05	AT2G31730.1	basic helix-loop-helix (bHLH) DNA-binding superfamily protein	NA
Dca37303	10.9195	12.0319	12.3958	23.3093	25.2814	34.6009	1.2347	4.31624	5.46704e-08	1.23335e-06	AT4G15420.1	Ubiquitin fusion degradation UFD1 family protein	GO:0005622;GO:0008270;GO:0006511
Dca24727	9.34837	8.85786	9.23609	13.822	22.1676	28.4596	1.23218	3.95305	5.60385e-06	9.38568e-05	Os04t0487100-01	Galactose oxidase/kelch, beta-propeller domain containing protein	NA
Dca49806	23.803	21.4065	13.9352	40.8934	56.4939	41.566	1.23146	5.05243	1.83916e-07	3.78704e-06	AT5G27930.1	Protein phosphatase 2C family protein	GO:0003824
Dca5480	21.2891	24.802	43.5879	69.9278	65.0941	75.2681	1.22999	5.64813	5.03101e-07	9.82882e-06	AT4G37410.1	CYP81F4; cytochrome P450, family 81, subfamily F, polypeptide 4	GO:0009055;GO:0020037;GO:0004497;GO:0016705
Dca34004	2.5924	3.39551	3.72684	6.46116	6.67251	9.66128	1.22946	2.48032	1.63123e-05	0.000256591	NA	NA	NA
Dca36278	17.4398	21.4803	14.0972	37.2948	52.1939	34.6758	1.22652	4.89232	2.27475e-07	4.6032e-06	AT5G67480.2	BT4; BTB and TAZ domain protein 4	GO:0005634;GO:0004402;GO:0003712;GO:0008270;GO:0006355
Dca37302	9.34837	9.30075	8.66896	15.9484	19.721	28.2349	1.22581	3.94228	1.45716e-06	2.65632e-05	AT4G15420.1	Ubiquitin fusion degradation UFD1 family protein	GO:0005622;GO:0008270;GO:0006511
Dca46513	14.6903	13.5821	17.662	26.9897	38.4782	41.7158	1.22333	4.68295	9.43434e-08	2.03606e-06	AT1G43770.2	RING/FYVE/PHD zinc finger superfamily protein	GO:0008270
Dca60732	4.55635	4.87182	6.80554	12.8405	13.4933	11.5336	1.22247	3.1973	9.11253e-07	1.706e-05	Os02t0681700-01	Serine/threonine protein kinase-related domain containing protein	GO:0005524;GO:0004674;GO:0016998
Dca29703	5.97039	6.42195	6.23841	11.5319	13.0485	18.8732	1.22129	3.39414	2.31016e-06	4.1178e-05	AT5G66870.1	ASL1, LBD36; ASYMMETRIC LEAVES 2-like 1	NA
Dca45340	9.97683	13.4344	14.8264	24.5361	33.1401	31.1558	1.21619	4.41577	1.08055e-07	2.29975e-06	AT4G03500.1	Ankyrin repeat family protein	NA
Dca9315	24.0387	22.2923	21.956	48.5814	57.6802	52.3507	1.21574	5.24714	3.25317e-11	1.04941e-09	AT3G02850.1	SKOR; STELAR K+ outward rectifier	GO:0016021;GO:0005249
Dca44956	43.4424	42.2963	51.6087	90.0473	115.731	112.79	1.21404	6.25078	9.86044e-10	2.74045e-08	AT4G02600.1	MLO1, ATMLO1; Seven transmembrane MLO family protein	GO:0016021;GO:0008219
Dca51197	136.69	130.727	120.069	265.071	348.009	285.719	1.21381	7.74515	1.91544e-08	4.59524e-07	Os09t0558900-01	Similar to NADPH-cytochrome P450 reductase (Fragment).	GO:0005789;GO:0010181;GO:0005506;GO:0003958
Dca19221	5.18481	3.98604	6.88656	10.7141	15.2726	11.1592	1.21238	3.17424	1.02635e-05	0.000165715	AT1G46480.1	WOX4; WUSCHEL related homeobox 4	GO:0005634;GO:0043565;GO:0003700
Dca7421	16.7328	16.1656	14.5833	28.0529	34.2522	47.7073	1.21205	4.72346	2.3599e-07	4.76289e-06	Os06t0632700-01	MULE transposase, conserved domain domain containing protein	GO:0003676;GO:0008270
Dca35998	18.2254	18.4539	19.2824	38.767	40.7765	50.029	1.21122	4.95815	1.20715e-09	3.31869e-08	AT5G38210.1	Protein kinase family protein	GO:0005524;GO:0004674
Dca56423	173.848	173.762	175.972	358.39	419.998	433.859	1.21118	8.17727	1.63321e-08	3.96807e-07	AT3G25290.1	Auxin-responsive family protein	GO:0016021;GO:0004497
Dca56676	49.4914	53.4424	60.6827	89.4748	145.98	142.523	1.20815	6.49885	1.04665e-07	2.23666e-06	Os12t0539700-01	Conserved hypothetical protein	GO:0005524;GO:0004386
Dca55594	8.40567	11.3676	7.61572	18.5656	25.1331	19.5472	1.2052	3.93299	7.73494e-07	1.46427e-05	Os05t0273800-01	Similar to Soluble epoxide hydrolase.	GO:0003824
Dca24832	36.058	38.5317	42.5346	70.1731	81.9236	117.883	1.20494	6.01535	3.80911e-08	8.75293e-07	AT5G56170.1	LLG1; LORELEI-LIKE-GPI-ANCHORED PROTEIN 1	NA
Dca42698	45.642	46.7252	49.8263	89.9655	107.353	129.791	1.202	6.29247	3.0178e-09	7.99402e-08	AT3G04470.1	Ankyrin repeat family protein	NA
Dca17777	18.8538	18.823	16.6088	35.5773	51.5266	37.5966	1.19952	4.9068	2.5246e-08	5.92621e-07	AT4G05160.1	AMP-dependent synthetase and ligase family protein	GO:0016874;GO:0047077
Dca35118	15.2402	17.4943	15.9606	32.5512	39.5902	39.6936	1.19907	4.75063	4.49298e-09	1.1639e-07	AT1G76690.1	OPR2, ATOPR2; 12-oxophytodienoate reductase 2	GO:0010181;GO:0016491
Dca19285	79.9717	79.8684	80.2082	159.239	171.409	220.412	1.19887	7.04457	7.35565e-09	1.85815e-07	Os09t0525900-01	Peptidase S54, rhomboid domain containing protein	GO:0016021;GO:0004252;GO:0006508
Dca61272	41.4785	36.0958	50.3934	67.3924	83.5547	142.523	1.19772	6.13767	5.7291e-06	9.57443e-05	AT4G25700.1	BETA-OHASE 1, B1, chy1, BCH1; beta-hydroxylase 1	GO:0016021;GO:0005506;GO:0016491;GO:0006633
Dca33288	5.73471	5.01945	4.45601	7.68796	13.4933	13.7055	1.19769	3.09098	1.89782e-05	0.000295781	AT1G12700.1	ATP binding;nucleic acid binding;helicases	GO:0005488
Dca14179	136.612	153.61	229.606	326.82	390.639	473.403	1.19597	8.15622	3.55504e-06	6.13607e-05	AT1G54320.1	LEM3 (ligand-effect modulator 3) family protein / CDC50 family protein	GO:0016020
Dca14470	9.34837	7.45537	10.5324	18.3203	17.2744	26.9617	1.19524	3.92044	2.70233e-06	4.77777e-05	AT2G30360.1	CIPK11, PKS5, SIP4, SNRK3.22; SOS3-interacting protein 4	GO:0005524;GO:0004683;GO:0007165
Dca40501	16.0258	17.199	15.7176	26.3354	49.599	35.949	1.19284	4.7537	1.1707e-06	2.15731e-05	Os02t0697400-01	Similar to 4-coumarate--CoA ligase 1 (EC 6.2.1.12) (4CL 1) (4-coumaroyl-CoA synthase 1) (Clone 4CL14) (Fragment).	GO:0016207
Dca1795	13.1191	21.1112	22.3611	41.2206	50.2663	37.5966	1.18928	4.95919	4.69895e-07	9.20798e-06	AT1G65730.1	YSL7; YELLOW STRIPE like 7	GO:0055085
Dca5625	15.7901	14.5417	16.6088	34.8412	37.2919	34.7507	1.18726	4.68908	1.47819e-09	4.02755e-08	NA	NA	NA
Dca18826	5.49904	7.38155	6.48147	10.6323	18.1641	15.2783	1.18603	3.42544	7.85493e-06	0.000129428	AT4G25440.1	ZFWD1; zinc finger WD40 repeat protein 1	GO:0016905;GO:0003676;GO:0008270
Dca20946	5.49904	4.20748	4.29397	8.58762	11.4915	11.7583	1.18566	2.96422	3.00102e-06	5.25109e-05	NA	NA	NA
Dca54556	11.0766	12.1796	14.7453	30.5883	31.9539	23.8911	1.18535	4.38504	1.09279e-07	2.32226e-06	AT4G04610.1	APR1, APR, PRH19, ATAPR1; APS reductase 1	GO:0045454;GO:0019419
Dca43778	145.882	143.497	139.027	288.544	335.627	349.229	1.18403	7.86912	1.77129e-08	4.27632e-07	AT2G17290.1	CPK6, ATCDPK3, ATCPK6; Calcium-dependent protein kinase family protein	GO:0005524;GO:0005509;GO:0004674
Dca52283	22.4675	18.5277	28.1134	53.4068	64.8716	38.1958	1.17942	5.23849	5.80575e-07	1.1199e-05	AT4G21990.1	APR3, PRH-26, PRH26, ATAPR3; APS reductase 3	GO:0016671;GO:0045454;GO:0019419
Dca34998	7.6201	9.22694	7.77776	16.1938	17.7934	21.7192	1.17637	3.76059	4.75416e-07	9.29987e-06	AT1G52140.1	unknown protein	NA
Dca27161	69.1308	54.6973	67.0022	126.197	139.011	165.74	1.1754	6.69755	7.4262e-09	1.87287e-07	AT4G33430.2	BAK1; BRI1-associated receptor kinase	GO:0016021;GO:0005524;GO:0004674;GO:0004872
Dca38813	14.3761	15.8703	11.9097	21.6735	35.8091	37.5966	1.17291	4.52653	1.93033e-06	3.46098e-05	AT5G20320.1	DCL4, ATDCL4; dicer-like 4	GO:0005524;GO:0003725;GO:0004386;GO:0004525
Dca12186	26.4739	26.9427	37.9166	60.8494	64.2044	80.7354	1.17247	5.63461	1.22049e-08	3.00358e-07	AT5G18490.1	Plant protein of unknown function (DUF946)	NA
Dca47676	8.09144	6.49576	8.34489	17.5024	13.4933	20.5958	1.16982	3.6525	3.09513e-06	5.39719e-05	AT4G01970.1	AtSTS, STS; stachyose synthase	GO:0047268
Dca18246	42.1855	39.196	49.8263	85.958	86.6685	122.451	1.16949	6.15399	1.97904e-08	4.74037e-07	AT3G09830.1	Protein kinase superfamily protein	GO:0005524;GO:0004672
Dca62025	67.8739	63.4075	82.4767	170.28	161.03	148.963	1.16793	6.85581	7.90993e-09	1.9883e-07	AT1G68710.1	ATPase E1-E2 type family protein / haloacid dehalogenase-like hydrolase family protein	GO:0016021;GO:0005524;GO:0015662;GO:0000287;GO:0004012;GO:0006812
Dca33219	8.64135	8.93168	10.3703	19.1381	22.0193	21.5694	1.16688	3.93287	8.94162e-08	1.93613e-06	Os02t0681700-01	Serine/threonine protein kinase-related domain containing protein	GO:0005524;GO:0004674;GO:0016998
Dca9304	36.9221	38.2364	44.074	84.3222	96.01	87.2511	1.16634	6.01413	1.98911e-10	5.93929e-09	AT5G13550.1	SULTR4;1; sulfate transporter 4.1	GO:0016021;GO:0008271
Dca18804	25.7669	25.5402	23.0092	54.0611	65.8355	46.8085	1.16512	5.33385	2.00695e-09	5.38174e-08	Os02t0564000-01	Similar to Glutathione S-transferase.	GO:0005737;GO:0016034;GO:0016740;GO:0009072
Dca22570	7.07019	8.11971	7.21063	14.6398	21.4262	14.1549	1.16378	3.61695	3.3762e-06	5.85709e-05	AT2G42900.1	Plant basic secretory protein (BSP) family protein	NA
Dca7001	13.1191	9.59602	7.9398	18.7292	18.1641	31.68	1.161	4.06207	3.27124e-05	0.000489339	AT5G24030.1	SLAH3; SLAC1 homologue 3	GO:0016021;GO:0055085
Dca45334	10.9195	11.6628	11.5046	21.6735	26.2452	28.3098	1.16096	4.2134	5.57857e-08	1.25358e-06	AT4G03500.1	Ankyrin repeat family protein	NA
Dca35474	9.26981	9.89128	10.7754	27.8075	22.3158	16.7013	1.15703	4.02459	1.80813e-06	3.26491e-05	AT1G22710.1	SUC2, SUT1, ATSUC2; sucrose-proton symporter 2	GO:0005887;GO:0008515
Dca57153	22.3104	22.1447	21.3888	41.6295	51.3042	53.6239	1.15434	5.15242	1.1578e-09	3.18877e-08	AT4G09810.1	Nucleotide-sugar transporter family protein	GO:0016021
Dca6502	16.8899	18.0848	18.6342	30.9154	41.4437	46.8834	1.15355	4.85681	1.11085e-07	2.35735e-06	AT5G04500.1	glycosyltransferase family protein 47	GO:0031227;GO:0001888
Dca48624	41.3999	45.1013	48.449	83.0954	115.434	101.032	1.15056	6.1816	3.99709e-09	1.04074e-07	AT1G42470.1	Patched family protein	GO:0016021;GO:0008158
Dca7340	12.8835	16.018	14.5833	27.1532	39.3678	30.0324	1.15041	4.55502	1.82895e-07	3.7711e-06	AT5G14020.1	Endosomal targeting BRO1-like domain-containing protein	NA
Dca48625	18.9324	17.7157	23.0902	36.4769	48.1162	47.857	1.14951	5.00878	3.0255e-08	7.00502e-07	AT4G38350.2	Patched family protein	GO:0016021;GO:0008158;GO:0030301
Dca41417	26.1597	44.4369	49.9883	98.9621	89.3375	79.0128	1.14821	6.018	1.15259e-06	2.12908e-05	AT4G34880.1	Amidase family protein	GO:0016884
Dca44161	54.519	53.221	53.6341	99.0439	134.117	124.323	1.14753	6.43701	5.30773e-09	1.368e-07	AT3G57520.1	AtSIP2, SIP2; seed imbibition 2	GO:0003824
Dca14778	41.0071	47.0943	54.5253	106.078	131.671	76.5413	1.13981	6.25382	6.82127e-07	1.29936e-05	AT5G35570.1	O-fucosyltransferase family protein	NA
Dca37732	8.79846	7.75063	11.5856	18.0749	15.4951	28.3847	1.13964	3.92348	3.59023e-05	0.000532877	AT1G53570.1	MAP3KA, MAPKKK3; mitogen-activated protein kinase kinase kinase 3	GO:0005524;GO:0004672
Dca22658	14.7688	29.7476	28.7615	58.4776	54.5663	48.4562	1.13937	5.29596	3.38189e-06	5.85709e-05	Os04t0184100-01	Similar to OSIGBa0140C02.7 protein	GO:0016884
Dca9255	11.3909	10.9985	8.50693	19.4653	21.4262	26.9617	1.13392	4.05518	9.31092e-07	1.74101e-05	Os01t0847700-01	Similar to Aldose reductase.	GO:0016491
Dca30285	51.2196	54.4758	42.3726	95.527	122.923	106.274	1.13266	6.30315	2.12058e-08	5.0477e-07	Os10t0476000-01	Adaptin ear-binding coat-associated protein 1 NECAP-1 family protein	GO:0016020;GO:0006897
Dca25381	11.1552	13.5082	12.3958	24.945	28.3211	28.0102	1.13222	4.31365	5.13244e-08	1.16188e-06	Os08t0224000-01	NB-ARC domain containing protein	GO:0043531;GO:0006952
Dca51393	7.6201	9.96509	11.2615	19.1381	23.7986	20.2213	1.13053	3.95382	1.26654e-06	2.31714e-05	AT1G07880.2	ATMPK13; Protein kinase superfamily protein	GO:0005524;GO:0004707
Dca38952	3.45654	3.10025	2.51157	5.56151	6.30182	8.01362	1.12992	2.3183	4.86377e-05	0.000699781	AT5G54680.1	ILR3, bHLH105; basic helix-loop-helix (bHLH) DNA-binding superfamily protein	NA
Dca53273	50.7483	55.3616	56.8749	103.624	138.566	114.438	1.1297	6.43908	9.65952e-09	2.40878e-07	AT3G10640.1	VPS60.1; SNF7 family protein	GO:0015031
Dca33686	5.49904	6.12669	6.88656	10.3051	13.6416	16.4766	1.12733	3.32026	1.10656e-05	0.000178289	NA	NA	NA
Dca37924	42.264	40.1556	49.1781	78.3518	90.4496	118.557	1.12699	6.12908	6.47204e-08	1.43951e-06	AT5G20680.1	TBL16; TRICHOME BIREFRINGENCE-LIKE 16	NA
Dca9582	212.734	200.409	202.627	386.77	515.118	439.476	1.12324	8.3503	2.9189e-07	5.8447e-06	AT3G15880.2	WSIP2, TPR4; WUS-interacting protein 2	NA
Dca21000	7.54154	6.6434	4.8611	12.9223	13.4192	15.2034	1.12308	3.35907	4.74061e-06	8.00135e-05	Os07t0673200-01	Similar to F22D16.14 protein (RING finger family protein).	GO:0008270
Dca50356	4.32067	3.83841	4.69906	9.48728	8.37771	10.1106	1.12121	2.79927	4.00967e-06	6.86639e-05	AT2G36330.1	Uncharacterised protein family (UPF0497)	NA
Dca59265	8.56279	7.52918	7.85878	14.3127	17.8675	19.7719	1.11743	3.67973	2.05716e-06	3.67542e-05	AT4G09810.1	Nucleotide-sugar transporter family protein	GO:0016021
Dca41471	12.1764	17.3466	13.206	32.0604	29.878	30.8562	1.11691	4.50763	1.2489e-07	2.62837e-06	AT3G61670.1	Protein of unknown function (DUF3133)	NA
Dca31603	39.2788	39.3437	49.4212	76.4707	94.6014	106.499	1.11656	6.0825	3.58306e-08	8.2459e-07	AT3G12360.1	ITN1; Ankyrin repeat family protein	NA
Dca9367	71.0947	95.1482	105.405	202.422	232.426	153.906	1.11586	7.16549	1.9352e-06	3.46564e-05	AT1G65730.1	YSL7; YELLOW STRIPE like 7	GO:0055085
Dca36186	110.923	123.567	103.298	215.754	284.768	227.227	1.10722	7.47376	2.205e-07	4.47987e-06	AT1G55020.1	LOX1, ATLOX1; lipoxygenase 1	GO:0005506;GO:0016165;GO:0031408
Dca19284	64.5744	61.7836	60.4397	89.9655	132.783	179.595	1.10703	6.62005	4.28255e-06	7.28463e-05	Os04t0569900-01	IQ calmodulin-binding region domain containing protein	NA
Dca56908	51.5339	52.1137	50.6365	76.8796	131.893	122.826	1.10395	6.34258	1.14903e-06	2.12507e-05	AT4G09720.3	ATRABG3A, RABG3A; RAB GTPase homolog G3A	GO:0005525;GO:0016787;GO:0015031;GO:0007264
Dca62089	87.1205	100.168	123.229	158.339	188.165	320.395	1.10286	7.34936	5.09981e-05	0.000732702	AT4G11600.1	ATGPX6, PHGPX, LSC803, GPX6; glutathione peroxidase 6	GO:0004602;GO:0006979
Dca36041	8.09144	7.38155	7.0486	11.7773	18.683	17.8996	1.10281	3.58286	1.23007e-05	0.00019694	AT1G03070.1	Bax inhibitor-1 family protein	GO:0016021
Dca47301	7.77721	8.5626	8.58794	15.6213	23.7986	14.08	1.10149	3.72636	1.98381e-05	0.000308238	AT5G59300.1	UBC7, ATUBC7; ubiquitin carrier protein 7	GO:0005524;GO:0004842
Dca48569	63.5532	58.3881	88.391	135.684	127.964	187.384	1.10075	6.78641	2.74846e-06	4.8369e-05	AT1G09970.2	LRR XI-23, RLK7; Leucine-rich receptor-like protein kinase family protein	GO:0016021;GO:0032440;GO:0005524;GO:0004674;GO:0004714
Dca20290	43.0496	44.2893	43.3448	74.1807	86.0754	119.156	1.09634	6.09838	1.73303e-07	3.59764e-06	AT4G07960.1	ATCSLC12, CSLC12; Cellulose-synthase-like C12	GO:0016757
Dca21555	227.267	238.498	168.356	361.498	623.064	370.649	1.09564	8.37386	3.51914e-05	0.000522834	Os03t0599800-01	Reversibly glycosylated polypeptide.	GO:0030054;GO:0005618;GO:0008466;GO:0007047;GO:0030244
Dca52932	12.5692	13.213	12.7199	22.0007	30.9901	29.2085	1.09423	4.34228	5.30424e-07	1.03362e-05	AT1G03070.1	Bax inhibitor-1 family protein	GO:0016021
Dca27159	152.166	157.448	154.016	281.101	352.235	356.044	1.09354	7.92085	3.86033e-07	7.63956e-06	AT1G58290.1	HEMA1; Glutamyl-tRNA reductase family protein	GO:0008883;GO:0050661;GO:0006779
Dca7105	33.1513	38.1626	28.1134	66.0838	81.1081	64.783	1.09151	5.70226	1.19474e-08	2.94973e-07	AT4G25030.1	unknown protein	NA
Dca20857	29.6948	32.9955	40.1041	49.3993	75.5477	93.9915	1.09114	5.74934	3.52708e-06	6.09469e-05	AT3G09085.1	Protein of unknown function (DUF962)	NA
Dca9910	39.2788	38.9008	58.0902	80.8872	78.7356	129.791	1.08696	6.15194	8.65133e-06	0.000141481	AT5G02230.1	Haloacid dehalogenase-like hydrolase (HAD) superfamily protein	GO:0016787
Dca44300	7.30587	12.1057	13.6111	19.3835	24.8366	25.9132	1.08663	4.11749	2.12042e-05	0.00032846	AT1G03020.1	Thioredoxin superfamily protein	GO:0009055;GO:0015035;GO:0045454
Dca40177	36.3722	31.593	33.7036	54.0611	74.3614	87.0264	1.0838	5.7285	1.15469e-07	2.43683e-06	AT5G54680.1	ILR3, bHLH105; basic helix-loop-helix (bHLH) DNA-binding superfamily protein	NA
Dca10542	35.0367	36.0958	37.6735	56.1876	80.3667	93.692	1.08166	5.82473	2.24621e-07	4.55754e-06	AT5G20320.1	DCL4, ATDCL4; dicer-like 4	GO:0005524;GO:0003725;GO:0004386;GO:0004525
Dca20170	23.096	17.3466	19.0393	34.6776	38.1816	52.7251	1.07846	4.95457	1.66345e-06	3.01435e-05	AT1G69260.1	AFP1; ABI five binding protein	NA
Dca44467	57.4257	47.0943	55.0115	89.8838	107.724	139.003	1.07745	6.37252	6.58601e-07	1.25927e-05	Os12t0485400-01	Similar to Cyclin T1 (Fragment).	GO:0005634;GO:0019901;GO:0000079;GO:0006355
Dca24207	8.79846	8.26734	12.0717	17.9113	21.4262	22.0187	1.07572	3.92998	4.68442e-06	7.91527e-05	Os02t0141100-00	Similar to Auxin response factor 5.	GO:0005634;GO:0003677;GO:0046983;GO:0009734;GO:0006355;GO:0006351
Dca10543	23.4102	16.6823	20.4976	30.6701	43.8903	52.8749	1.07332	4.97751	6.433e-06	0.000106922	AT5G20320.1	DCL4, ATDCL4; dicer-like 4	GO:0005622;GO:0005524;GO:0008026;GO:0003725;GO:0004525;GO:0006396
Dca27659	86.4135	92.7861	98.9234	162.838	230.053	191.803	1.07201	7.16961	4.16106e-07	8.19218e-06	AT5G16970.1	AT-AER, AER; alkenal reductase	GO:0000166;GO:0016491;GO:0008270
Dca17590	37.0792	31.5192	33.8657	51.6893	70.8028	92.3439	1.06843	5.72935	1.07333e-06	1.99232e-05	Os03t0390200-02	Serine/threonine-protein kinase SAPK1 (EC 2.7.1.37) (Osmotic stress/abscisic acid-activated protein kinase 1).	GO:0005524;GO:0004674
Dca5925	14.0618	10.7771	11.2615	16.8481	28.5435	30.1821	1.06656	4.23137	3.39757e-05	0.000505758	AT5G50720.1	ATHVA22E, HVA22E; HVA22 homologue E	NA
Dca38103	7.07019	11.0723	11.4236	17.257	22.2417	22.3183	1.06377	3.94446	1.92749e-05	0.000299792	AT4G05200.1	CRK25; cysteine-rich RLK (RECEPTOR-like protein kinase) 25	GO:0005524;GO:0004674
Dca12139	7.93433	5.90524	5.91434	13.2495	14.1606	13.8553	1.06238	3.36858	6.71613e-06	0.000111386	AT1G77220.1	Protein of unknown function (DUF300)	NA
Dca13368	7.85577	7.82444	5.34721	11.9409	14.8278	17.1506	1.06094	3.45838	3.29053e-05	0.000491742	AT3G11320.1	Nucleotide-sugar transporter family protein	GO:0016021
Dca36883	10.2911	9.00549	8.10183	18.8928	21.4262	16.7762	1.05831	3.83205	3.38117e-06	5.85709e-05	AT1G52140.1	unknown protein	NA
Dca56259	5.02769	4.35511	5.50925	9.3237	10.8243	10.7847	1.05589	2.96284	9.95531e-06	0.00016108	AT1G12530.1	unknown protein	NA
Dca48200	17.6755	17.5681	24.3865	35.9862	40.0351	47.6324	1.05292	4.94052	1.18203e-06	2.17293e-05	AT1G72330.3	ALAAT2; alanine aminotransferase 2	GO:0016847;GO:0030170;GO:0016769
Dca11951	10.9981	13.5082	11.5046	21.2646	24.1693	29.2085	1.05076	4.21784	2.11131e-06	3.76777e-05	Os05t0419600-01	Conserved hypothetical protein	NA
Dca37621	14.6117	12.4748	17.4189	23.9635	24.8366	43.2885	1.04979	4.51907	5.78827e-05	0.000822323	AT4G38900.1	Basic-leucine zipper (bZIP) transcription factor family protein	GO:0005634;GO:0046983;GO:0043565;GO:0003700
Dca29	46.0348	38.7531	42.2106	77.0432	107.872	77.8145	1.04895	6.02499	1.79135e-07	3.70358e-06	AT4G02570.1	ATCUL1, CUL1, AXR6; cullin 1	GO:0031461;GO:0031625;GO:0006511
Dca9652	27.0238	28.6404	34.5948	51.6893	56.1974	78.4885	1.0464	5.53197	5.66069e-07	1.09608e-05	AT1G53570.1	MAP3KA, MAPKKK3; mitogen-activated protein kinase kinase kinase 3	GO:0005524;GO:0004672
Dca55908	69.2093	68.9437	75.104	120.308	128.705	191.203	1.04568	6.76921	2.78343e-06	4.89282e-05	AT5G16910.1	ATCSLD2, CSLD2; cellulose-synthase like D2	GO:0016760;GO:0007047;GO:0030244
Dca24740	10.3696	10.1865	11.7477	21.3464	21.871	23.4417	1.04527	4.05763	5.68928e-07	1.10022e-05	AT3G13050.1	Major facilitator superfamily protein	GO:0016021;GO:0022857
Dca31967	28.8307	31.224	22.6851	56.5965	63.3889	50.8528	1.0451	5.40685	1.00724e-07	2.16458e-06	AT4G25030.1	unknown protein	NA
Dca62046	12.3336	12.6963	10.6134	19.0563	25.578	28.8341	1.04314	4.19801	5.35762e-06	9.01285e-05	AT2G33205.1	Serinc-domain containing serine and sphingolipid biosynthesis protein	GO:0016020
Dca11218	4.47779	6.12669	7.53471	13.9038	11.714	11.7583	1.04192	3.2334	4.84771e-05	0.000699114	AT4G17090.1	CT-BMY, BAM3, BMY8; chloroplast beta-amylase	GO:0016161;GO:0043169;GO:0000272
Dca29108	33.5441	38.3841	48.3679	64.6934	88.522	93.4673	1.03643	5.93849	1.1547e-06	2.1304e-05	Os05t0458100-01	Similar to FK506-binding protein 4 (EC 5.2.1.8) (Peptidyl-prolyl cis-trans isomerase) (PPIase) (Rotamase) (p59 protein) (HSP binding immunophilin) (HBI) (FKBP52 protein) (52 kDa FK506 binding protein) (FKBP59).	GO:0016853;GO:0006457
Dca36128	12.4907	11.0723	13.449	19.6288	34.4746	21.7192	1.03545	4.24582	3.93438e-05	0.000580568	AT2G32120.1	HSP70T-2; heat-shock protein 70T-2	GO:0005524
Dca1621	32.1301	31.8883	28.9235	52.0982	63.2406	75.1183	1.03502	5.56681	7.95001e-08	1.74675e-06	AT1G08370.1	DCP1, ATDCP1; decapping 1	NA
Dca48548	29.3806	27.0165	27.1411	46.4549	63.6854	60.4392	1.03018	5.41004	8.39387e-08	1.82962e-06	AT5G52210.1	ATARLB1, ATGB1, GB1; GTP-binding protein 1	GO:0005622;GO:0005525;GO:0007264
Dca45827	4.55635	3.3217	4.61805	7.4426	8.74841	9.28681	1.03	2.69771	6.33654e-05	0.000891087	AT1G07880.2	ATMPK13; Protein kinase superfamily protein	GO:0005524;GO:0004707
Dca40259	132.998	149.033	127.685	223.932	277.873	331.704	1.02453	7.69608	4.99619e-06	8.41411e-05	AT2G25430.1	epsin N-terminal homology (ENTH) domain-containing protein / clathrin assembly protein-related	GO:0030118;GO:0005545;GO:0030276;GO:0048268
Dca33709	87.9846	98.3961	105.324	183.366	219.822	189.93	1.02381	7.20586	5.35203e-07	1.0416e-05	AT4G28300.1	Protein of unknown function (DUF1421)	NA
Dca58989	24.6671	23.99	20.2546	36.3951	51.2301	52.2009	1.02072	5.12758	8.27012e-07	1.55785e-05	Os01t0932600-01	BTB domain containing protein	NA
Dca39943	17.2041	20.4469	23.3333	38.767	45.8179	39.0945	1.02021	4.95128	6.06999e-07	1.16792e-05	AT4G31000.1	Calmodulin-binding protein	NA
Dca22212	20.8178	17.2728	20.9027	27.0714	44.3351	48.0068	1.01811	4.90227	2.26621e-05	0.000349978	AT4G28088.1	Low temperature and salt responsive protein family	GO:0016021
Dca44166	33.7013	26.6474	33.6226	54.2247	63.7596	72.1975	1.01767	5.57048	1.26561e-07	2.65988e-06	AT2G41790.1	Insulinase (Peptidase family M16) family protein	GO:0004222;GO:0008270;GO:0006508
Dca51591	44.1494	45.3227	40.6712	72.2178	85.334	105.825	1.01696	6.03899	2.75528e-07	5.52432e-06	AT1G18070.3	Translation elongation factor EF1A/initiation factor IF2gamma family protein	GO:0005525;GO:0003924
Dca6794	27.2595	27.6808	31.3541	48.5814	59.0147	66.8051	1.01545	5.44669	1.01327e-07	2.17447e-06	AT4G08500.1	MEKK1, ATMEKK1, MAPKKK8, ARAKIN; MAPK/ERK kinase kinase 1	GO:0005524;GO:0004709
Dca17758	836.482	889.329	875.484	1423.25	1889.66	1944.24	1.01505	10.3552	1.63657e-05	0.000257166	AT2G47800.1	ATMRP4, EST3, MRP4, ABCC4; multidrug resistance-associated protein 4	GO:0016021;GO:0032440;GO:0005524;GO:0042626
Dca6861	32.0515	30.1905	29.8958	51.3621	60.275	74.5192	1.01478	5.54064	1.61796e-07	3.36333e-06	AT1G19310.1	RING/U-box superfamily protein	GO:0008270
Dca33	67.0097	68.427	66.435	122.435	143.607	141.624	1.01392	6.66893	7.40491e-08	1.63036e-06	AT2G46500.1	ATPI4K GAMMA 4, UBDK GAMMA 4, PI4K GAMMA 4; phosphoinositide 4-kinase gamma 4	GO:0016773
Dca47587	50.5912	46.4299	49.5832	88.7387	98.679	108.296	1.01238	6.20714	5.0762e-08	1.15086e-06	AT2G40950.1	BZIP17; Basic-leucine zipper (bZIP) transcription factor family protein	GO:0005634;GO:0046983;GO:0043565;GO:0003700
Dca48615	95.6833	105.261	103.136	189.664	224.419	198.318	1.00998	7.25653	5.93934e-07	1.14422e-05	AT1G42540.1	ATGLR3.3, GLR3.3; glutamate receptor 3.3	GO:0016021;GO:0030288;GO:0005234;GO:0004965;GO:0004970
Dca40445	38.6504	41.1152	36.4583	64.6116	88.003	81.4094	1.00968	5.8714	7.06916e-08	1.55869e-06	AT3G54870.1	MRH2, ARK1, CAE1; Armadillo/beta-catenin repeat family protein / kinesin motor family protein	GO:0005874;GO:0005524;GO:0003777;GO:0007018
Dca19928	15.5544	12.2534	11.6666	25.3539	30.4711	23.6664	1.00963	4.32106	4.3303e-06	7.34947e-05	AT5G14230.1	CONTAINS InterPro DOMAIN/s: Ankyrin repeat-containing domain (InterPro:IPR020683), Ankyrin repeat (InterPro:IPR002110)	NA
Dca24731	9.42692	9.74365	10.9375	14.7216	20.0175	25.8383	1.00935	3.9337	5.82652e-05	0.000826987	Os09t0497000-01	Adenine nucleotide translocator 1 domain containing protein	GO:0016021;GO:0005743;GO:0005488;GO:0055085
Dca53069	56.8758	63.998	68.2174	107.223	137.899	135.258	1.00844	6.57102	3.33391e-07	6.64952e-06	AT1G60710.1	ATB2; NAD(P)-linked oxidoreductase superfamily protein	NA
Dca13045	6.83452	9.37457	11.0995	17.8295	20.0175	17.0758	1.00793	3.79322	2.86452e-05	0.000432742	AT2G23620.1	ATMES1, MES1; methyl esterase 1	NA
Dca38815	17.5184	15.5751	14.4213	25.5993	32.547	37.3719	1.00748	4.58528	3.36772e-06	5.85247e-05	AT5G20320.1	DCL4, ATDCL4; dicer-like 4	GO:0005622;GO:0005524;GO:0008026;GO:0003725;GO:0004525;GO:0006396
Dca31713	8.09144	7.75063	9.56016	15.0488	14.6054	21.3447	1.00605	3.68853	4.73448e-05	0.00068668	AT5G52430.1	hydroxyproline-rich glycoprotein family protein	NA
Dca56371	8.7199	12.2534	14.0972	27.5622	23.0572	19.8468	1.00571	4.14894	2.804e-05	0.000424439	AT4G31940.1	CYP82C4; cytochrome P450, family 82, subfamily C, polypeptide 4	GO:0009055;GO:0033772;GO:0020037
Dca7331	4.32067	4.20748	4.05092	7.93332	7.4139	9.88596	1.00283	2.69178	6.12659e-05	0.00086468	AT1G08940.1	Phosphoglycerate mutase family protein	GO:0003824
Dca26578	35.351	36.0958	33.2175	52.5072	74.139	82.9822	1.00216	5.71567	6.92375e-07	1.3156e-05	AT3G49160.1	pyruvate kinase family protein	GO:0000287;GO:0030955;GO:0004743;GO:0006096
Dca17627	42.7354	43.1821	44.236	71.8906	117.881	70.4	0.999344	6.02727	7.29288e-06	0.000120511	Os01t0876400-03	Hypothetical conserved gene	NA
Dca29613	152.559	163.132	166.088	270.142	374.18	318.523	0.998943	7.91251	5.38328e-06	9.04604e-05	AT5G16970.1	AT-AER, AER; alkenal reductase	GO:0000166;GO:0016491;GO:0008270
Dca24076	28.4379	27.0903	28.1134	49.0721	51.3783	66.2809	0.995341	5.38857	1.97627e-07	4.03667e-06	AT4G28910.2	NINJA; novel interactor of JAZ	NA
Dca59606	22.9388	21.7756	19.6875	35.9044	41.1472	50.8528	0.989788	5.00972	1.18647e-06	2.17586e-05	AT3G11320.1	Nucleotide-sugar transporter family protein	GO:0016021
Dca34660	9.97683	12.6225	13.8541	19.7924	29.5815	22.9924	0.989587	4.19393	2.75164e-05	0.000416926	AT5G04320.2	Shugoshin C terminus	GO:0000775;GO:0005634;GO:0045132
Dca52336	13.0406	11.8843	10.5324	19.5471	28.4694	22.3932	0.989571	4.15466	1.19998e-05	0.000192324	AT2G35390.2	Phosphoribosyltransferase family protein	GO:0016301;GO:0000287;GO:0004749;GO:0009116;GO:0009156
Dca19044	17.9897	18.3062	15.9606	26.2536	33.7333	43.663	0.987946	4.70892	1.57991e-05	0.000249289	AT1G22100.1	Inositol-pentakisphosphate 2-kinase family protein	GO:0005524;GO:0035299
Dca25930	41.8713	45.4703	44.5601	76.3071	77.327	107.922	0.987604	6.03869	6.63926e-07	1.26786e-05	AT5G22850.1	Eukaryotic aspartyl protease family protein	GO:0005524;GO:0004674
Dca25930	41.8713	45.4703	44.5601	76.3071	77.327	107.922	0.987604	6.03869	6.63926e-07	1.26786e-05	AT5G22850.1	Eukaryotic aspartyl protease family protein	GO:0004190;GO:0006508
Dca25930	41.8713	45.4703	44.5601	76.3071	77.327	107.922	0.987604	6.03869	6.63926e-07	1.26786e-05	AT3G44850.1	Protein kinase superfamily protein	GO:0005524;GO:0004674
Dca25930	41.8713	45.4703	44.5601	76.3071	77.327	107.922	0.987604	6.03869	6.63926e-07	1.26786e-05	AT3G44850.1	Protein kinase superfamily protein	GO:0004190;GO:0006508
Dca17095	8.01289	7.45537	10.2083	13.9038	17.4968	19.3975	0.985784	3.69012	5.39759e-05	0.00077185	AT5G58940.1	CRCK1; calmodulin-binding receptor-like cytoplasmic kinase 1	GO:0005524;GO:0004674
Dca41953	25.2956	28.5666	28.3564	55.2879	66.7993	40.7421	0.985522	5.35756	2.70036e-06	4.77777e-05	AT2G06530.1	VPS2.1; SNF7 family protein	GO:0015031
Dca58696	176.912	192.289	227.256	359.371	451.877	369.226	0.984899	8.211	1.16534e-05	0.000187363	AT1G60420.1	DC1 domain-containing protein	GO:0047134;GO:0045454
Dca41808	24.2743	23.3995	27.1411	38.6852	54.1215	55.1217	0.984092	5.22071	1.11385e-06	2.06503e-05	AT1G18660.4	zinc finger (C3HC4-type RING finger) family protein	GO:0004176;GO:0008270;GO:0006508
Dca15745	28.4379	29.9691	28.1944	60.3587	57.5319	53.1745	0.981515	5.42965	2.56347e-08	6.0082e-07	AT3G15430.1	Regulator of chromosome condensation (RCC1) family protein	NA
Dca6022	10.9981	10.9985	13.287	21.5917	23.0572	24.9396	0.980376	4.14057	2.95133e-06	5.17007e-05	Os04t0608900-01	Similar to Serine/thronine protein kinase-like protein	GO:0005524;GO:0004674
Dca42170	9.58404	13.4344	11.0995	17.3388	23.5021	26.4375	0.978964	4.09328	4.22876e-05	0.000621005	AT2G36680.1	Modifier of rudimentary (Mod(r)) protein	NA
Dca24438	7.07019	7.1601	6.40045	12.4316	12.5295	15.7277	0.97873	3.3759	2.54979e-05	0.000389437	AT3G55390.1	Uncharacterised protein family (UPF0497)	NA
Dca20054	24.7457	21.0374	22.199	41.9567	48.1904	43.2885	0.973056	5.07594	2.36349e-07	4.76383e-06	Os02t0773400-01	Cyclic nucleotide-binding domain containing protein	GO:0016020;GO:0005216
Dca51229	312.738	283.968	258.124	484.996	700.021	492.8	0.972866	8.72203	3.15913e-05	0.000474897	AT5G18840.1	Major facilitator superfamily protein	GO:0016021;GO:0022891
Dca46169	24.2743	23.5471	22.5231	34.5958	43.2972	59.84	0.969518	5.12299	1.14109e-05	0.000183657	AT4G38040.1	Exostosin family protein	GO:0016020
Dca54583	15.2402	16.387	14.5833	28.2165	35.9574	26.2128	0.967339	4.51909	4.02206e-06	6.87989e-05	AT5G02290.1	NAK; Protein kinase superfamily protein	GO:0005524;GO:0004674
Dca57256	14.7688	19.4873	18.0671	37.8673	33.8074	30.4817	0.964096	4.69497	4.03762e-06	6.89105e-05	AT1G33260.1	Protein kinase superfamily protein	GO:0005524;GO:0004674
Dca9465	69.7592	74.1108	88.6341	130.286	172.744	150.162	0.963003	6.83852	3.63989e-06	6.26833e-05	AT1G60420.1	DC1 domain-containing protein	GO:0047134;GO:0045454
Dca33646	15.633	15.6489	18.9583	27.3168	35.5867	34.9753	0.962896	4.63514	4.54101e-06	7.68999e-05	Os06t0622700-01	bZIP transcription factor, bZIP-1 domain containing protein	GO:0005634;GO:0046983;GO:0043565;GO:0003700
Dca17260	18.3825	19.8564	19.0393	30.7519	36.9954	43.8877	0.962731	4.82363	4.2994e-06	7.30514e-05	Os04t0679200-02	Similar to H0801D08.12 protein	GO:0005524;GO:0004674
Dca51598	286.814	320.285	306.006	479.598	631.368	666.029	0.960584	8.80902	1.9952e-05	0.000309693	AT4G08685.1	SAH7; Pollen Ole e 1 allergen and extensin family protein	GO:0005615
Dca44074	38.8075	43.3297	45.9374	69.846	86.8909	92.3439	0.959776	5.97783	5.21346e-07	1.01723e-05	AT5G50460.1	secE/sec61-gamma protein transport protein	GO:0016020;GO:0015450;GO:0006605
Dca54584	38.3362	38.3102	39.618	73.6082	80.4408	72.0477	0.959483	5.83843	3.14051e-08	7.26029e-07	Os05t0110900-01	Similar to Protein kinase APK1B, chloroplast precursor (EC 2.7.1.-).	GO:0005524;GO:0004674
Dca46485	33.1513	30.7811	31.9212	45.4735	74.2132	66.0562	0.954789	5.55772	4.03296e-06	6.89081e-05	AT2G36670.1	Eukaryotic aspartyl protease family protein	GO:0004190;GO:0006508
Dca52766	21.4463	22.6614	19.3634	30.8336	55.3819	36.6979	0.953444	4.9651	5.67498e-05	0.00080698	Os09t0462200-01	Alpha/beta hydrolase fold-3 domain containing protein	GO:0016787
Dca26928	11.548	10.1865	10.4514	16.4392	25.3555	20.446	0.952003	3.99129	4.37459e-05	0.000638732	AT5G20110.1	Dynein light chain type 1 family protein	GO:0005875;GO:0007017
Dca56427	49.0986	45.8394	47.8818	76.0618	71.9149	128.218	0.951539	6.12927	4.33991e-05	0.000634275	AT3G07360.1	PUB9, ATPUB9; plant U-box 9	GO:0000151;GO:0005488;GO:0004842
Dca24557	8.09144	9.07931	10.6134	14.8034	18.3865	20.2213	0.943575	3.77561	6.15357e-05	0.000866954	AT4G34310.1	alpha/beta-Hydrolases superfamily protein	GO:0005488
Dca13366	5.10625	5.09327	5.10416	9.48728	10.676	9.28681	0.943523	2.92936	4.77677e-05	0.000690843	NA	NA	NA
Dca14603	64.8101	67.6888	59.7105	95.3635	125.592	147.54	0.938957	6.54874	8.10975e-06	0.000133339	AT5G43900.3	MYA2; myosin 2	GO:0016459;GO:0003779;GO:0005524;GO:0003774
Dca56683	74.4727	83.0424	97.6271	148.852	151.392	188.657	0.938301	6.95614	7.29797e-06	0.000120511	AT1G06870.1	Peptidase S24/S26A/S26B/S26C family protein	GO:0016021;GO:0008236;GO:0006508
Dca3473	158.137	162.246	172.002	244.952	356.238	338.594	0.932585	7.90003	3.24547e-05	0.000485961	AT5G55660.1	DEK domain-containing chromatin associated protein	NA
Dca7161	231.431	236.505	209.027	327.638	450.32	513.77	0.932151	8.35881	6.29019e-05	0.000885385	AT1G22610.1	C2 calcium/lipid-binding plant phosphoribosyltransferase family protein	NA
Dca7161	231.431	236.505	209.027	327.638	450.32	513.77	0.932151	8.35881	6.29019e-05	0.000885385	Os01t0587150-00	Hypothetical protein	NA
Dca52694	17.047	17.5681	15.4745	29.0343	29.4332	36.8477	0.927683	4.60859	5.51567e-06	9.24814e-05	AT2G39890.1	PROT1, ATPROT1; proline transporter 1	GO:0016021
Dca46165	75.8867	79.2778	76.4003	131.84	157.99	149.188	0.922838	6.80641	1.94643e-06	3.48167e-05	AT3G19240.1	Vacuolar import/degradation, Vid27-related protein	NA
Dca55907	58.9183	57.207	63.5184	91.1106	96.2325	152.783	0.921047	6.4395	4.76445e-05	0.000689715	AT3G03050.1	CSLD3, KJK, ATCSLD3; cellulose synthase-like D3	GO:0016760;GO:0007047;GO:0030244
Dca18841	11.9408	11.4414	12.3958	17.3388	26.9866	23.3668	0.920723	4.12196	5.42582e-05	0.000773712	AT2G13440.1	glucose-inhibited division family A protein	GO:0050660;GO:0002098
Dca55128	58.9183	62.3741	66.435	111.557	106.019	137.729	0.92041	6.50247	2.78697e-06	4.89339e-05	AT1G08010.1	GATA11; GATA transcription factor 11	GO:0005634;GO:0043565;GO:0003700;GO:0008270;GO:0045893
Dca9175	66.067	72.1177	69.0276	120.636	153.32	118.032	0.919639	6.64428	2.74239e-06	4.83313e-05	AT1G54460.1	TPX2 (targeting protein for Xklp2) protein family	NA
Dca17413	7.6201	7.1601	8.42591	13.7402	14.383	15.7277	0.918577	3.50261	4.30485e-05	0.000630965	AT4G31420.2	Zinc finger protein 622	GO:0005622;GO:0008270
Dca8243	17.754	14.394	19.2013	30.3429	35.2902	31.2307	0.916424	4.63573	8.96194e-06	0.000146091	AT4G21990.1	APR3, PRH-26, PRH26, ATAPR3; APS reductase 3	GO:0033741;GO:0045454;GO:0019419
Dca23414	50.0413	53.221	48.773	89.4748	108.391	89.0486	0.916073	6.19615	7.16063e-07	1.35892e-05	AT5G58320.2	Kinase interacting (KIP1-like) family protein	GO:0016301
Dca33566	16.1043	12.1057	17.5	23.2275	30.1746	32.6536	0.914124	4.46743	4.86095e-05	0.000699781	AT2G40510.1	Ribosomal protein S26e family protein	GO:0005840;GO:0003735;GO:0006412
Dca44083	37.8648	39.7866	37.2684	55.1243	84.4444	76.766	0.912781	5.79125	4.24156e-06	7.22296e-05	AT4G37670.2	NAGS2; N-acetyl-l-glutamate synthase 2	NA
Dca60684	39.1217	38.9746	43.9119	73.6082	67.2441	88.749	0.912225	5.87675	7.95445e-07	1.50395e-05	AT1G17500.1	ATPase E1-E2 type family protein / haloacid dehalogenase-like hydrolase family protein	GO:0016021;GO:0005524;GO:0015662;GO:0000287;GO:0004012;GO:0006812
Dca20879	15.0045	14.4678	18.7152	30.8336	31.5832	28.0851	0.909669	4.54037	8.55404e-06	0.00014004	AT5G19160.1	TBL11; TRICHOME BIREFRINGENCE-LIKE 11	NA
Dca45111	77.7721	74.6275	72.6735	113.357	140.345	168.735	0.908394	6.75602	1.52714e-05	0.000241462	AT4G39150.1	DNAJ heat shock N-terminal domain-containing protein	GO:0031072;GO:0051082;GO:0006457
Dca30616	34.9582	30.7072	29.4097	50.2989	62.8699	64.783	0.904488	5.51314	1.42608e-06	2.60277e-05	AT2G35020.1	GlcNAc1pUT2; N-acetylglucosamine-1-phosphate uridylyltransferase 2	GO:0016779
Dca51246	36.5293	34.398	32.6504	55.2879	64.9458	73.4707	0.903205	5.6355	8.38933e-07	1.57641e-05	Os02t0816900-01	Myosin XI (Fragment).	GO:0016459;GO:0003779;GO:0005524;GO:0003774
Dca19223	116.894	132.573	102.812	211.746	209.591	237.488	0.903015	7.39814	1.32451e-05	0.000210515	AT1G45688.1	unknown protein; FUNCTIONS IN: molecular_function unknown; INVOLVED IN: biological_process unknown; LOCATED IN: plasma membrane; EXPRESSED IN: 22 plant structures; EXPRESSED DURING: 13 growth stages	NA
Dca23683	43.2853	47.2419	44.7221	72.7903	90.0789	90.0222	0.902883	6.01914	9.88522e-07	1.83937e-05	AT2G35020.1	GlcNAc1pUT2; N-acetylglucosamine-1-phosphate uridylyltransferase 2	GO:0016779
Dca43152	24.0387	23.8424	24.7916	40.4027	53.8991	41.2664	0.899719	5.12389	3.57867e-06	6.16987e-05	Os04t0584800-01	GTP1/OBG domain containing protein	GO:0005525;GO:0007264
Dca18800	35.351	35.6529	41.0763	53.0797	64.501	91.4452	0.899491	5.74641	3.0192e-05	0.000454757	AT3G60800.1	DHHC-type zinc finger family protein	GO:0008270
Dca36166	37.1578	29.4524	34.8379	55.8604	70.2838	62.9856	0.899116	5.6026	1.18439e-06	2.17467e-05	Os06t0622700-01	bZIP transcription factor, bZIP-1 domain containing protein	GO:0005634;GO:0046983;GO:0043565;GO:0003700
Dca55921	44.935	47.2419	49.3402	82.114	90.0789	91.4452	0.897605	6.08079	6.3016e-07	1.20943e-05	AT2G17520.1	IRE1A, ATIRE1-2, IRE1-2; Endoribonuclease/protein kinase IRE1-like	GO:0005524;GO:0016891;GO:0004674;GO:0006397
Dca47092	38.3362	49.7516	30.868	71.1546	84.4444	65.4571	0.893228	5.82869	2.07146e-05	0.000321203	AT3G21240.1	4CL2, AT4CL2; 4-coumarate:CoA ligase 2	GO:0016874;GO:0047077
Dca29294	35.4295	51.3756	49.2592	89.1477	93.6376	69.9507	0.893	6.02142	1.88253e-05	0.00029386	Os08t0495800-02	Similar to alkaline alpha galactosidase 3.	GO:0003824
Dca1374	68.8165	65.9911	53.2291	104.605	122.7	121.777	0.892393	6.48678	6.21658e-06	0.000103438	AT4G34320.1	Protein of unknown function (DUF677)	NA
Dca17195	16.9685	13.6559	17.743	27.8075	30.4711	31.3804	0.891246	4.53369	1.29159e-05	0.000205925	Os10t0573900-01	NMD3 family protein	NA
Dca61599	43.0496	38.3102	44.8842	59.459	83.8512	90.5464	0.889842	5.91128	1.25058e-05	0.000200015	AT3G61600.1	ATPOB1, POB1; POZ/BTB containin G-protein 1	NA
Dca8355	11.3123	12.5486	13.125	18.9746	23.2055	26.2877	0.888779	4.14888	4.42285e-05	0.000645161	AT5G25480.1	DNMT2, AtDNMT2; DNA methyltransferase-2	GO:0003677;GO:0006306
Dca62273	31.973	31.6668	32.4884	45.7189	52.4904	79.3873	0.885772	5.51687	5.1172e-05	0.000734509	Os03t0733800-00	Endoplasmic reticulum oxidoreductin 1 family protein	GO:0005789;GO:0050660;GO:0016671;GO:0006467
Dca48090	246.357	260.716	251.886	397.648	522.532	479.02	0.882507	8.49128	4.58387e-05	0.000667373	AT1G60490.1	ATVPS34, VPS34, PI3K; vacuolar protein sorting 34	GO:0005942;GO:0016303;GO:0005488;GO:0048015
Dca33845	16.8113	14.7631	17.581	25.1904	30.3229	34.4511	0.872798	4.54526	3.17839e-05	0.000476852	AT1G16670.1	Protein kinase superfamily protein	GO:0005524;GO:0004715;GO:0004674
Dca16987	28.9092	30.3382	23.2523	41.3024	59.3112	50.4034	0.871971	5.28865	1.79328e-05	0.000280922	AT4G30850.1	HHP2; heptahelical transmembrane protein2	GO:0016021
Dca20564	129.62	132.942	147.21	232.356	253.704	260.405	0.865276	7.59145	2.31827e-05	0.000357295	AT5G53300.1	UBC10; ubiquitin-conjugating enzyme 10	GO:0016881;GO:0005524
Dca53757	46.2705	52.4828	42.3726	75.7346	96.3807	82.7575	0.852541	6.048	6.88792e-06	0.000114111	AT1G51680.1	4CL1, 4CL.1, AT4CL1; 4-coumarate:CoA ligase 1	GO:0016874
Dca57927	77.3008	73.1512	64.8147	103.869	145.831	137.28	0.846159	6.65165	3.62641e-05	0.000537202	Os08t0118900-01	Adenylate kinase family protein	GO:0005524;GO:0019205;GO:0006139
Dca42615	33.5441	38.9746	39.1319	50.6261	73.9907	75.6426	0.843117	5.70468	2.60674e-05	0.000396547	Os04t0682300-02	Similar to Phosphomannomutase 2 (EC 5.4.2.8) (PMM 2).	GO:0005737;GO:0004615;GO:0019307
Dca57248	15.3973	16.2394	16.7708	25.7629	31.1384	29.4332	0.834882	4.49944	2.40149e-05	0.000369003	AT1G32120.1	FUNCTIONS IN: molecular_function unknown; INVOLVED IN: biological_process unknown; LOCATED IN: membrane; EXPRESSED IN: 14 plant structures; EXPRESSED DURING: 4 anthesis, C globular stage, F mature embryo stage, petal differentiation and expansion stage, E expanded cotyledon stage; CONTAINS InterPro DOMAIN/s: Aminotransferase-like, plant mobile domain (InterPro:IPR019557), Protein of unknown funct…	GO:0016020
Dca56421	31.4231	29.8215	36.4583	46.4549	66.0579	61.3379	0.832004	5.50534	2.42271e-05	0.000371328	AT3G07400.1	lipase class 3 family protein	NA
Dca2789	31.5802	27.8284	33.5416	44.901	60.794	59.0911	0.826711	5.43026	1.88357e-05	0.00029386	AT1G14130.1	2-oxoglutarate (2OG) and Fe(II)-dependent oxygenase superfamily protein	GO:0016706;GO:0016702
Dca53414	41.7141	43.8464	44.7221	64.6116	77.6236	88.749	0.826299	5.91588	1.19871e-05	0.000192323	AT1G26810.1	GALT1; galactosyltransferase1	GO:0005794;GO:0016021;GO:0008378;GO:0005529;GO:0006486
Dca47726	34.6439	39.3437	42.5346	62.6487	66.5768	77.2903	0.825757	5.75489	5.91129e-06	9.8681e-05	AT1G12450.1	SNARE associated Golgi protein family	NA
Dca37198	34.4868	32.7741	35.324	55.9422	58.9405	66.5056	0.822441	5.56951	3.06963e-06	5.35885e-05	AT5G01960.1	RING/U-box superfamily protein	GO:0008270
Dca23367	54.6762	60.012	57.7661	86.2851	106.241	111.891	0.819861	6.31548	2.60585e-05	0.000396547	AT4G11860.1	Protein of unknown function (DUF544)	NA
Dca24002	23.2531	21.7756	23.6574	37.7037	43.5196	39.9932	0.819745	4.9914	1.27715e-05	0.000203836	Os01t0179200-01	Syntaxin, N-terminal domain containing protein	GO:0016020;GO:0005484;GO:0006886;GO:0016192
Dca27270	51.1411	49.3826	49.4212	69.7642	92.9703	100.133	0.81009	6.10785	3.39335e-05	0.000505623	AT5G17190.1	FUNCTIONS IN: molecular_function unknown; INVOLVED IN: intracellular protein transport; LOCATED IN: endomembrane system, integral to membrane, endoplasmic reticulum; EXPRESSED IN: 23 plant structures; EXPRESSED DURING: 13 growth stages; CONTAINS InterPro DOMAIN/s: B-cell receptor-associated 31-like (InterPro:IPR008417)	GO:0005783;GO:0016021;GO:0006886
Dca54683	45.4064	50.1207	55.0925	76.7161	82.8133	104.027	0.807342	6.11251	3.4414e-05	0.000511782	Os01t0779400-01	Zinc finger, RING/FYVE/PHD-type domain containing protein	GO:0005524;GO:0003677;GO:0004386;GO:0008270
Dca54503	100.554	110.576	99.6526	156.867	186.608	199.067	0.803796	7.15366	7.10776e-05	0.000992225	AT1G59820.1	ALA3; aminophospholipid ATPase 3	GO:0016021;GO:0005524;GO:0015662;GO:0000287;GO:0004012;GO:0006812
Dca7465	41.0857	36.2434	43.5068	65.0205	81.034	64.5583	0.801899	5.79183	1.45919e-05	0.000231197	AT3G47730.1	ATATH1, ATH1, ABCA2; ATP-binding cassette A2	GO:0005524;GO:0016887
Dca265	35.9794	38.827	41.4814	55.9422	66.651	79.9864	0.801043	5.73629	2.56683e-05	0.000391255	AT2G45910.1	U-box domain-containing protein kinase family protein	GO:0000151;GO:0005524;GO:0004674;GO:0004842
Dca5123	27.5738	24.5806	29.5717	41.8749	48.1904	52.0511	0.798783	5.22755	2.1819e-05	0.0003373	Os04t0608900-01	Similar to Serine/thronine protein kinase-like protein	GO:0005524;GO:0004674
Dca28671	61.1964	64.3671	59.8726	95.6906	102.164	124.174	0.796209	6.40497	4.00498e-05	0.000590416	AT2G25290.1	Phox1; Octicosapeptide/Phox/Bem1p (PB1) domain-containing protein / tetratricopeptide repeat (TPR)-containing protein	GO:0005488
Dca250	50.3555	59.9382	52.824	83.8315	93.4152	105.001	0.790901	6.21706	3.18341e-05	0.000477137	AT1G01540.2	Protein kinase superfamily protein	GO:0005524;GO:0004709;GO:0004872
Dca34431	42.1069	46.5038	37.5925	58.8047	79.3288	79.8366	0.788269	5.84625	4.31765e-05	0.000631795	Os02t0771100-03	Similar to COP1 (Fragment).	GO:0008270
Dca61465	53.812	55.214	55.8216	83.0954	101.126	97.7362	0.774423	6.22168	3.16539e-05	0.000475369	AT1G15130.1	Endosomal targeting BRO1-like domain-containing protein	NA
Dca35664	59.3896	52.9995	55.9837	86.2851	93.7117	106.424	0.766591	6.24715	4.80082e-05	0.000693664	AT1G64760.1	O-Glycosyl hydrolases family 17 protein	GO:0043169;GO:0004553;GO:0005975
Dca8888	56.8758	50.416	56.3888	79.3332	97.4187	100.657	0.761386	6.20314	6.07113e-05	0.000857716	AT3G15880.2	WSIP2, TPR4; WUS-interacting protein 2	NA
Dca56548	41.6356	44.7322	45.8564	61.0948	81.4788	80.8851	0.757247	5.89349	5.40635e-05	0.00077237	AT1G43890.1	ATRAB18, ATRABC1, RAB18-1, RABC1, ATRAB-C1, RAB18; RAB GTPASE HOMOLOG B18	GO:0005525;GO:0015031;GO:0007264
Dca47236	42.8139	42.5915	48.9351	73.8535	73.5459	78.4137	0.749358	5.91126	2.35217e-05	0.000362154	AT5G59420.1	ORP3C; OSBP(oxysterol binding protein)-related protein 3C	NA
Dca32501	26.0026	27.3856	29.0856	42.9381	51.4525	43.9626	0.746504	5.20807	5.24319e-05	0.000750475	AT2G26640.1	KCS11; 3-ketoacyl-CoA synthase 11	GO:0016020;GO:0016747;GO:0006633
Dca19821	38.1005	39.8604	44.3981	58.1505	75.7701	70.1005	0.73794	5.76975	6.13176e-05	0.00086468	AT3G20420.1	RTL2, ATRTL2; RNAse THREE-like protein 2	GO:0003725;GO:0004525;GO:0006396
Dca29030	39.5145	39.3437	40.1851	57.4962	70.7286	69.9507	0.735505	5.7288	3.15528e-05	0.000474786	AT4G19180.1	GDA1/CD39 nucleoside phosphatase family protein	GO:0016787
Dca60587	55.4617	58.6833	58.2522	38.1127	32.6212	34.3762	-0.714109	5.53608	4.69238e-05	0.00068187	AT4G04640.1	ATPC1; ATPase, F1 complex, gamma subunit protein	GO:0045261;GO:0046933;GO:0046961;GO:0015986
Dca23454	66.4598	69.8295	62.2221	44.4103	37.2178	38.5702	-0.724234	5.73524	3.72149e-05	0.000550752	AT3G26570.1	PHT2;1, ORF02; phosphate transporter 2;1	GO:0016020;GO:0005315
Dca7470	46.1134	53.0733	51.2036	32.3058	28.6177	27.6358	-0.764358	5.32104	2.31531e-05	0.000357199	AT1G74730.1	Protein of unknown function (DUF1118)	NA
Dca7720	54.7547	55.214	48.2869	34.5141	27.4314	30.9311	-0.769391	5.39254	3.3638e-05	0.000501709	AT1G21640.2	NADK2; NAD kinase 2	GO:0003951
Dca46396	45.4064	39.1222	45.3703	24.8632	22.6865	28.4596	-0.772623	5.10712	4.81908e-05	0.000695644	AT2G24820.1	TIC55-II; translocon at the inner envelope membrane of chloroplasts 55-II	GO:0051537;GO:0010277;GO:0046872;GO:0018489
Dca13616	36.4508	34.4718	36.9444	20.8556	22.0193	20.0715	-0.776576	4.83891	5.54074e-05	0.000789362	AT3G62980.1	TIR1; F-box/RNI-like superfamily protein	NA
Dca51730	65.9099	70.5676	67.5693	37.8673	29.6556	48.0817	-0.819616	5.73951	4.55248e-05	0.000663436	AT2G30520.1	RPT2; Phototropic-responsive NPH3 family protein	GO:0004871
Dca119	67.9524	74.6275	85.0693	51.6075	34.2522	42.6894	-0.824868	5.89507	4.08033e-05	0.000600943	AT1G63800.1	UBC5; ubiquitin-conjugating enzyme 5	GO:0016881;GO:0005524
Dca11230	40.4572	40.5247	35.8911	23.0639	20.0175	22.543	-0.832898	4.93396	1.53875e-05	0.000243047	AT4G18020.1	APRR2, PRR2; CheY-like two-component responsive regulator family protein	GO:0005634;GO:0003677;GO:0000156;GO:0006355
Dca22315	104.403	138.183	109.942	72.4632	57.2353	68.2281	-0.83301	6.52194	4.15409e-05	0.000610627	AT2G35940.1	BLH1, EDA29; BEL1-like homeodomain 1	GO:0005634;GO:0043565;GO:0003700
Dca33262	22.7817	22.7352	22.4421	13.3313	11.714	11.983	-0.876303	4.1414	1.58851e-05	0.000250387	Os03t0158300-01	Glycoside hydrolase-type carbohydrate-binding domain containing protein	GO:0030246;GO:0003824;GO:0005975
Dca42608	54.7547	57.6499	66.7591	35.2501	22.4641	39.6936	-0.879212	5.5311	6.64748e-05	0.000933093	AT4G00730.1	ANL2, AHDP; Homeobox-leucine zipper family protein / lipid-binding START domain-containing protein	GO:0005634;GO:0043565;GO:0003700
Dca1789	41.7927	39.7127	40.5092	27.0714	21.5003	17.7498	-0.880255	4.97888	2.42393e-05	0.000371328	AT1G23400.1	CAF2, ATCAF2; RNA-binding CRS1 / YhbY (CRM) domain-containing protein	GO:0003723
Dca5222	36.1365	36.8339	46.0994	26.6625	17.2003	20.2213	-0.894381	4.93861	5.41135e-05	0.00077237	AT4G40060.1	ATHB16, ATHB-16, HB16; homeobox protein 16	GO:0005634;GO:0003700;GO:0000976;GO:0006351
Dca46574	139.047	124.305	139.108	89.5566	53.3801	73.3958	-0.895826	6.69034	4.25662e-05	0.000624495	AT2G25490.1	EBF1, FBL6; EIN3-binding F box protein 1	NA
Dca16533	37.1578	37.4983	36.0532	20.7739	21.871	16.7762	-0.897677	4.8332	7.87389e-06	0.000129601	AT1G09570.1	PHYA, FHY2, FRE1, HY8; phytochrome A	GO:0016020;GO:0005524;GO:0008020;GO:0042803;GO:0000155;GO:0018106;GO:0018298;GO:0017006;GO:0009585;GO:0006355;GO:0006351
Dca33291	20.7392	28.788	22.4421	14.8852	12.3071	11.3838	-0.900915	4.21554	6.9993e-05	0.000977979	AT5G08050.1	Protein of unknown function (DUF1118)	GO:0009535;GO:0080167
Dca17515	40.0644	41.7796	35.8101	24.4543	20.5365	18.0494	-0.900995	4.91964	9.12262e-06	0.000148235	AT1G61520.1	LHCA3; photosystem I light harvesting complex gene 3	GO:0009507;GO:0016020;GO:0009765
Dca22636	25.6884	25.6878	25.7638	16.7663	12.3071	11.7583	-0.918975	4.30802	2.61913e-05	0.000397638	AT3G10760.1	Homeodomain-like superfamily protein	GO:0005634;GO:0003677;GO:0006355
Dca24064	14.5332	17.6419	14.4213	8.50583	8.74841	7.33958	-0.922141	3.58737	6.05238e-05	0.00085586	Os02t0273800-02	Multi antimicrobial extrusion protein MatE domain containing protein	GO:0016020;GO:0015297;GO:0015238
Dca12795	44.8564	62.4479	52.2568	29.6068	31.0643	22.6928	-0.936858	5.34491	4.07188e-06	6.94175e-05	AT1G18170.1	FKBP-like peptidyl-prolyl cis-trans isomerase family protein	GO:0003755;GO:0006457
Dca56998	26.3954	27.7546	26.8171	16.0302	9.93463	16.3268	-0.937562	4.37097	5.89826e-05	0.000836248	Os06t0194000-02	Similar to Ethylene-responsive transcription factor 3 (Ethylene-responsive element binding factor 3 homolog) (EREBP-5) (NtERF5).	GO:0005634;GO:0003677;GO:0003700;GO:0006351
Dca41236	16.8113	15.206	12.2338	7.85154	7.71046	7.48937	-0.940726	3.50727	5.18358e-05	0.000742639	AT5G45680.1	ATFKBP13, FKBP13; FK506-binding protein 13	GO:0003755;GO:0006457
Dca22492	29.1449	35.1362	35.7291	21.101	18.7572	12.2077	-0.942372	4.67204	5.62349e-05	0.000800403	NA	NA	NA
Dca40176	23.3316	28.788	27.1411	15.6213	13.0485	12.4323	-0.948162	4.33704	9.02387e-06	0.000146944	AT3G01440.1	PQL1, PQL2; PsbQ-like 1	GO:0019898;GO:0009654;GO:0005509;GO:0015979
Dca57003	12.4121	14.2464	15.3125	8.34226	6.37596	6.81532	-0.963654	3.42378	3.75955e-05	0.000555844	AT2G44310.1	Calcium-binding EF-hand family protein	GO:0005829;GO:0005509
Dca42498	29.6948	24.5806	18.6342	12.677	11.2691	13.0315	-0.979492	4.20697	2.5385e-05	0.000388101	AT1G68710.1	ATPase E1-E2 type family protein / haloacid dehalogenase-like hydrolase family protein	GO:0016021;GO:0005524;GO:0015662;GO:0000287;GO:0004012;GO:0006812
Dca17672	124.435	116.259	119.583	69.437	63.0182	49.6545	-0.984436	6.50056	8.25329e-07	1.5566e-05	AT4G26530.1	Aldolase superfamily protein	GO:0004332;GO:0006096
Dca11242	26.2383	36.4649	26.655	17.9113	16.8296	10.2604	-0.990562	4.49493	6.78519e-05	0.000949802	Os03t0100030-01	CAAX amino terminal protease domain containing protein	GO:0016020
Dca43850	51.9266	65.1791	55.7406	34.0233	19.202	33.777	-0.990922	5.44157	1.5136e-05	0.00023957	AT4G23890.1	unknown protein; FUNCTIONS IN: molecular_function unknown; INVOLVED IN: biological_process unknown; LOCATED IN: chloroplast thylakoid membrane, chloroplast; EXPRESSED IN: 22 plant structures; EXPRESSED DURING: 13 growth stages; CONTAINS InterPro DOMAIN/s: Protein of unknown function DUF3252 (InterPro:IPR021659)	NA
Dca37585	1003.1	1158.68	1044.41	647.343	567.905	394.69	-0.993878	9.64896	4.86609e-05	0.000699781	AT3G08940.2	LHCB4.2; light harvesting complex photosystem II	GO:0016020;GO:0009765
Dca62119	51.0625	52.0399	48.0439	29.5251	21.871	24.0409	-1.00337	5.24459	1.28961e-07	2.70659e-06	AT1G63680.1	ATMURE, PDE316, MURE; acid-amino acid ligases;ligases;ATP binding;ATP binding;ligases	GO:0005737;GO:0016881;GO:0005524;GO:0051301;GO:0009252;GO:0008360
Dca42499	17.047	20.2254	16.2037	8.01511	10.3053	8.3132	-1.00445	3.75588	1.35329e-05	0.000214864	AT1G26130.2	ATPase E1-E2 type family protein / haloacid dehalogenase-like hydrolase family protein	GO:0016021;GO:0005524;GO:0015662;GO:0000287;GO:0004012;GO:0006812
Dca37662	81.7	68.3532	86.1225	43.756	35.6609	38.1958	-1.00585	5.88527	5.44806e-08	1.2315e-06	AT2G37170.1	PIP2B, PIP2;2; plasma membrane intrinsic protein 2	GO:0016021;GO:0005215;GO:0055085;GO:0006833
Dca19072	34.3297	41.9272	36.9444	22.7367	12.5295	20.9702	-1.01018	4.82725	2.69233e-05	0.000408346	AT2G44740.1	CYCP4;1; cyclin p4;1	GO:0016301;GO:0019901;GO:0000079
Dca34073	26.3954	30.8549	29.7337	14.3127	12.3812	16.4017	-1.01294	4.44836	9.86122e-07	1.83715e-05	AT5G02160.1	unknown protein; FUNCTIONS IN: molecular_function unknown; INVOLVED IN: biological_process unknown; LOCATED IN: chloroplast thylakoid membrane; EXPRESSED IN: 23 plant structures; EXPRESSED DURING: 13 growth stages	GO:0031072;GO:0051082
Dca58841	14.6903	12.0319	17.2569	8.17869	6.74665	6.81532	-1.01576	3.47187	2.61847e-05	0.000397638	NA	NA	NA
Dca55513	47.9988	55.3616	45.8564	31.8969	19.4986	22.3183	-1.01861	5.22124	2.50744e-06	4.45385e-05	AT1G70820.1	phosphoglucomutase, putative / glucose phosphomutase, putative	GO:0016868;GO:0005975
Dca16094	31.8944	22.7352	31.6782	18.811	11.195	12.5072	-1.02242	4.43343	3.62343e-05	0.000537202	AT2G07180.1	Protein kinase superfamily protein	GO:0005524;GO:0004674
Dca62384	15.633	14.9107	13.449	8.0969	8.08115	5.39234	-1.0286	3.46959	2.55913e-05	0.000390472	Os02t0705500-02	Helix-loop-helix DNA-binding domain containing protein	NA
Dca53131	46.7418	47.8324	51.3656	29.934	20.5365	20.9702	-1.03145	5.18483	3.49771e-07	6.95803e-06	AT3G07310.1	Protein of unknown function (DUF760)	NA
Dca56002	27.5738	26.795	21.4699	12.5952	11.4915	12.3575	-1.0574	4.23782	7.40811e-07	1.40414e-05	Os04t0674300-01	NPH3 domain containing protein	GO:0004871;GO:0009416
Dca33329	24.1958	25.2449	24.6296	12.8405	10.6019	11.983	-1.06443	4.20153	2.73354e-07	5.48794e-06	AT4G00050.1	UNE10; basic helix-loop-helix (bHLH) DNA-binding superfamily protein	GO:0006355
Dca59183	19.5609	21.3327	14.5023	9.16013	11.0467	6.21617	-1.06793	3.78596	5.90273e-05	0.000836248	Os05t0436100-00	Similar to predicted protein	GO:0005524;GO:0004674
Dca10545	10.2125	13.7297	11.0185	4.41649	5.78284	6.44085	-1.06822	3.13085	2.48541e-05	0.000380365	AT2G47910.1	CRR6; chlororespiratory reduction 6	NA
Dca18116	14.3761	20.1516	17.824	9.978	8.89668	6.06639	-1.07082	3.70412	3.0133e-05	0.000454318	AT5G28010.1	Polyketide cyclase/dehydrase and lipid transport superfamily protein	GO:0006952;GO:0009607
Dca39589	40.143	50.8589	45.4513	25.8446	20.9813	17.7498	-1.0802	5.07273	1.91631e-07	3.93528e-06	AT1G51400.1	Photosystem II 5 kD protein	NA
Dca42760	28.9878	33.0693	21.0648	18.402	10.157	10.7098	-1.08383	4.36104	6.74472e-05	0.000945872	NA	NA	NA
Dca53980	28.4379	34.398	27.3032	17.257	9.04496	16.0272	-1.09167	4.47437	1.30554e-05	0.000207716	AT1G69850.1	ATNRT1:2, NTL1, NRT1:2; nitrate transporter 1:2	GO:0016020;GO:0005215;GO:0006857
Dca36400	24.0387	34.1766	28.6805	18.4838	12.9743	9.28681	-1.09423	4.42104	2.82196e-05	0.000426734	AT4G29310.1	Protein of unknown function (DUF1005)	NA
Dca19672	86.8063	89.4644	77.8586	46.9457	35.5867	36.0238	-1.10053	5.96031	9.87293e-09	2.45744e-07	Os01t0913000-01	Similar to Thioredoxin F-type 2, chloroplast precursor (TRX-F2).	GO:0009055;GO:0015035;GO:0045454;GO:0006662
Dca49021	21.0535	26.4259	22.28	12.7587	12.4554	7.26468	-1.10365	4.10363	9.94119e-06	0.000161022	AT1G64680.1	unknown protein	NA
Dca1540	30.9517	33.8813	34.0277	16.4392	10.5277	18.7983	-1.11129	4.60009	1.87349e-06	3.37095e-05	Os04t0191000-01	Similar to OSIGBa0114M03.4 protein	GO:0003723;GO:0003964;GO:0008270;GO:0015074;GO:0006278
Dca31471	83.114	97.5841	96.5739	53.325	38.5523	36.0238	-1.11679	6.08055	5.91032e-08	1.32035e-06	AT4G40060.1	ATHB16, ATHB-16, HB16; homeobox protein 16	GO:0005634;GO:0003700;GO:0000976;GO:0006351
Dca35537	24.2743	25.6878	17.581	11.4502	11.5657	8.08851	-1.11929	4.05285	3.90162e-06	6.69639e-05	AT1G44000.1	unknown protein	NA
Dca53928	11.9408	10.4818	13.044	5.64329	3.85523	6.74043	-1.12575	3.13147	1.84224e-05	0.000288296	AT1G62960.1	ACS10; ACC synthase 10	GO:0016847;GO:0030170
Dca33110	407.322	474.634	658.517	252.803	189.129	261.079	-1.13173	8.54711	5.42891e-06	9.11268e-05	Os11t0521000-01	Lipase, GDSL domain containing protein	GO:0016788;GO:0006629
Dca33453	146.274	146.967	122.095	91.6831	49.08	48.2315	-1.13641	6.65629	8.37796e-06	0.000137453	AT4G24340.1	Phosphorylase superfamily protein	GO:0003824;GO:0009116
Dca26569	48.6272	50.7112	39.699	29.4433	16.8296	17.0009	-1.13721	5.08175	2.42797e-06	4.31771e-05	AT4G24340.1	Phosphorylase superfamily protein	GO:0003824;GO:0009116
Dca38077	8.48423	8.63641	7.69674	4.58006	3.63281	3.07064	-1.13932	2.62446	9.69038e-06	0.000157126	AT1G23400.1	CAF2, ATCAF2; RNA-binding CRS1 / YhbY (CRM) domain-containing protein	GO:0003723
Dca36467	21.3677	20.2993	23.7384	10.7959	10.0088	8.68766	-1.14881	3.99657	1.14236e-07	2.41415e-06	AT4G03520.1	ATHM2; Thioredoxin superfamily protein	GO:0009055;GO:0015035;GO:0045454;GO:0006662
Dca20495	4.32067	4.72419	4.61805	2.37182	1.63106	2.09702	-1.16429	1.78403	5.15916e-05	0.000739835	Os04t0591100-01	Protein of unknown function DUF597 family protein	NA
Dca40392	16.34	16.6823	18.3101	9.40549	5.04145	8.46298	-1.16499	3.64595	8.3953e-06	0.000137589	NA	NA	GO:0003723;GO:0003964;GO:0008270;GO:0015074;GO:0006278
Dca53452	26.9453	33.5861	26.8171	15.8666	13.1967	9.66128	-1.17478	4.40353	5.54763e-07	1.07555e-05	AT5G01920.1	STN8; Protein kinase superfamily protein	GO:0005524;GO:0004674
Dca62489	9.6626	11.22	12.9629	6.05223	4.59662	4.34383	-1.17569	3.05052	2.91017e-06	5.10384e-05	AT5G26820.1	ATIREG3, MAR1, RTS3, IREG3; iron-regulated protein 3	GO:0016021;GO:0005381
Dca38878	141.482	158.408	137.569	82.4411	47.3007	63.7345	-1.17735	6.71841	2.61134e-07	5.24952e-06	AT5G58900.1	Homeodomain-like transcriptional regulator	GO:0005634;GO:0003677;GO:0006355
Dca9579	70.7805	57.1332	53.3911	26.7443	22.7607	30.6315	-1.17768	5.45033	2.40996e-09	6.40613e-08	AT5G20190.1	Tetratricopeptide repeat (TPR)-like superfamily protein	GO:0005488
Dca16268	5.10625	4.50275	3.72684	1.79931	1.77934	2.24681	-1.19035	1.74315	4.76062e-05	0.000689715	AT4G31560.1	HCF153; high chlorophyll fluorescence 153	NA
Dca18534	16.7328	21.3327	21.4699	10.3051	9.19324	6.36596	-1.20353	3.84613	1.17246e-06	2.15795e-05	AT1G35420.2	alpha/beta-Hydrolases superfamily protein	GO:0016787
Dca19378	19.2466	22.5875	19.2824	8.34226	10.8243	7.33958	-1.20404	3.88354	2.96784e-07	5.92714e-06	AT1G21500.1	unknown protein	NA
Dca57581	8.87702	9.81746	8.91202	4.25292	4.59662	3.07064	-1.21096	2.75271	1.8328e-06	3.30322e-05	AT4G32295.1	unknown protein	NA
Dca46288	25.6884	39.4175	28.8425	15.2941	10.3795	14.754	-1.21744	4.49517	3.71252e-07	7.36614e-06	AT1G68520.1	B-box type zinc finger protein with CCT domain	GO:0005622;GO:0008270
Dca19674	21.2891	25.9831	25.1967	12.5952	10.157	8.2383	-1.22672	4.12028	8.55536e-08	1.86216e-06	AT1G65230.1	Uncharacterized conserved protein (DUF2358)	NA
Dca59271	7.54154	8.5626	9.07405	4.58006	2.59487	3.5949	-1.2276	2.61766	6.60514e-06	0.000109664	AT1G68520.1	B-box type zinc finger protein with CCT domain	GO:0005622;GO:0008270
Dca57211	16.8113	17.4943	13.6921	7.4426	5.48629	7.56426	-1.22848	3.53208	3.9484e-07	7.78355e-06	AT3G08920.1	Rhodanese/Cell cycle control phosphatase superfamily protein	NA
Dca2574	10.6838	9.15312	13.125	5.39793	4.52248	4.11915	-1.23042	2.99557	1.1259e-06	2.08482e-05	AT3G15570.1	Phototropic-responsive NPH3 family protein	GO:0004871;GO:0009416
Dca28681	14.6117	15.1322	10.7754	7.36082	6.30182	3.5949	-1.23321	3.29005	1.66515e-05	0.000261119	AT1G74070.1	Cyclophilin-like peptidyl-prolyl cis-trans isomerase family protein	GO:0003755;GO:0006457
Dca16447	10.2125	9.59602	7.77776	5.80687	2.37245	3.52	-1.24203	2.7428	6.96522e-05	0.000974109	AT2G35660.1	CTF2A; FAD/NAD(P)-binding oxidoreductase family protein	GO:0016491
Dca60822	21.6819	20.4469	17.9051	9.3237	9.26738	6.66554	-1.24931	3.84456	9.25507e-08	2.0002e-06	AT4G34280.1	transducin family protein / WD-40 repeat family protein	NA
Dca54327	13.9833	13.213	15.2314	7.27903	5.18973	5.31745	-1.2554	3.34761	2.07467e-07	4.22634e-06	AT5G58360.1	ATOFP3, OFP3; ovate family protein 3	NA
Dca28096	32.7586	25.9831	29.3286	13.9038	12.4554	10.4102	-1.26022	4.38895	6.55347e-09	1.66933e-07	AT5G57345.1	unknown protein	NA
Dca37566	64.3388	63.7028	77.4535	29.5251	24.021	32.2043	-1.26064	5.60542	3.59987e-11	1.15392e-09	AT2G40610.1	ATEXPA8, EXP8, ATEXP8, ATHEXP ALPHA 1.11, EXPA8; expansin A8	GO:0005576;GO:0016020;GO:0009664
Dca44169	350.76	336.82	268.414	167.581	132.931	97.2869	-1.26508	7.81878	3.46957e-07	6.91105e-06	AT5G13630.1	GUN5, CCH, CHLH, CCH1, ABAR; magnesium-chelatase subunit chlH, chloroplast, putative / Mg-protoporphyrin IX chelatase, putative (CHLH)	GO:0016851;GO:0000166;GO:0015995
Dca8664	383.754	455.515	422.754	218.044	183.346	119.455	-1.27688	8.21574	5.39957e-07	1.04951e-05	AT1G15820.1	LHCB6, CP24; light harvesting complex photosystem II subunit 6	GO:0009507;GO:0016020;GO:0009765
Dca7165	16.1043	17.8634	17.581	6.8701	6.30182	8.01362	-1.28163	3.61748	2.21228e-08	5.24146e-07	AT4G09350.1	Chaperone DnaJ-domain superfamily protein	GO:0005524;GO:0031072;GO:0051082;GO:0006457;GO:0009408
Dca3448	127.656	206.314	177.025	85.3855	67.3924	54.9719	-1.29868	6.90619	8.38336e-08	1.82962e-06	AT3G48360.1	BT2, ATBT2; BTB and TAZ domain protein 2	GO:0005634;GO:0004402;GO:0003712;GO:0008270;GO:0006355
Dca23174	4.87058	4.57656	4.21295	1.55395	1.63106	2.3217	-1.30335	1.74339	8.83349e-06	0.000144151	AT4G18740.1	Rho termination factor	GO:0006353
Dca44721	46.6633	65.6958	60.6017	30.9154	23.1314	15.2783	-1.31984	5.34085	1.0165e-07	2.17835e-06	AT5G58260.1	oxidoreductases, acting on NADH or NADPH, quinone or similar compound as acceptor	GO:0016020;GO:0016655
Dca61539	16.1829	13.8773	14.2592	7.60618	5.04145	4.79319	-1.34758	3.38371	9.87122e-08	2.12433e-06	AT2G29650.1	ANTR1, PHT4;1; phosphate transporter 4;1	GO:0016021;GO:0055085
Dca13025	3.29942	3.76459	3.40277	1.06323	1.03795	1.94723	-1.36047	1.36406	2.94465e-05	0.000444406	AT4G14819.1	Protein of unknown function (DUF1677)	NA
Dca46225	52.8693	73.2988	77.2105	33.6962	24.9107	20.446	-1.36393	5.56122	1.79101e-09	4.83669e-08	AT1G74940.1	Protein of unknown function (DUF581)	NA
Dca41797	489.1	569.265	511.145	249.368	209.146	151.285	-1.36397	8.50528	1.38162e-08	3.36753e-07	AT3G47470.1	LHCA4, CAB4; light-harvesting chlorophyll-protein complex I subunit A4	GO:0009507;GO:0016020;GO:0009765
Dca12622	12.8835	14.0249	13.6921	6.62474	4.52248	4.56851	-1.37147	3.25292	2.90857e-08	6.78066e-07	AT2G20570.2	GPRI1; GBF's pro-rich region-interacting factor 1	GO:0003677;GO:0006355
Dca57298	6.75596	10.6294	5.67128	2.78075	2.89142	3.22043	-1.37342	2.45626	6.00461e-06	0.000100129	Os03t0696300-01	Similar to Nuclear transcription factor Y subunit A-1.	GO:0016602;GO:0003677;GO:0003700
Dca53957	25.7669	28.7142	25.1157	12.5952	10.5277	7.26468	-1.39046	4.20787	6.20061e-09	1.58749e-07	AT1G18730.1	NDF6; NDH dependent flow 6	NA
Dca23836	8.48423	8.85786	9.31711	3.35326	2.96556	3.74468	-1.40297	2.64849	1.37608e-08	3.35941e-07	AT3G21870.1	CYCP2;1; cyclin p2;1	GO:0019901;GO:0000079
Dca11522	8.95558	9.5222	9.31711	3.84398	2.96556	3.66979	-1.40712	2.70676	1.27219e-08	3.12076e-07	Os03t0198300-02	Heat shock protein DnaJ, N-terminal domain containing protein	GO:0031072
Dca56170	6.36317	9.00549	8.26387	3.68041	3.26212	1.87234	-1.42416	2.47463	1.90004e-06	3.4147e-05	AT1G25440.1	B-box type zinc finger protein with CCT domain	GO:0005622;GO:0008270
Dca31732	18.3825	25.9092	24.7916	11.9409	7.56218	5.8417	-1.44872	3.98947	1.8237e-07	3.76536e-06	Os11t0127800-02	Similar to FHA domain containing protein, expressed.	NA
Dca38021	19.6394	20.816	45.1272	15.7031	8.00701	7.63915	-1.44938	4.29375	4.13044e-05	0.000607736	Os04t0308600-00	Similar to H0211A12.11 protein	NA
Dca52360	18.6967	27.2379	28.0323	11.6137	7.4139	8.01362	-1.45318	4.08581	1.11052e-08	2.75071e-07	AT2G46680.1	ATHB-7, ATHB7, HB-7; homeobox 7	GO:0005634;GO:0003700;GO:0000976;GO:0006351
Dca25005	6.36317	4.13367	5.50925	2.45361	1.26036	2.09702	-1.46155	1.91803	3.82113e-06	6.56563e-05	AT3G21420.1	2-oxoglutarate (2OG) and Fe(II)-dependent oxygenase superfamily protein	GO:0045431
Dca12967	9.26981	7.38155	7.69674	4.989	1.40864	2.47149	-1.46197	2.5049	6.75737e-05	0.000946777	AT1G04500.1	CCT motif family protein	NA
Dca45913	10.9981	14.6155	12.3958	5.64329	3.4104	4.64341	-1.47469	3.13231	2.4443e-08	5.74654e-07	AT2G34620.1	Mitochondrial transcription termination factor family protein	NA
Dca37567	32.7586	16.6823	31.1921	8.50583	7.85874	12.5072	-1.47953	4.2007	2.95972e-07	5.91866e-06	AT2G40610.1	ATEXPA8, EXP8, ATEXP8, ATHEXP ALPHA 1.11, EXPA8; expansin A8	GO:0005576;GO:0016020;GO:0009664
Dca13342	12.8835	16.6823	17.3379	6.62474	4.44834	5.54213	-1.49823	3.42404	3.17158e-09	8.37231e-08	AT3G29240.1	Protein of unknown function (DUF179)	NA
Dca22703	11.4694	13.3606	15.3935	6.05223	4.44834	3.5949	-1.51431	3.20115	1.23021e-08	3.02262e-07	Os01t0300900-01	Galactose oxidase/kelch, beta-propeller domain containing protein	NA
Dca53956	7.22731	12.8439	11.5046	3.68041	2.89142	4.41873	-1.52115	2.85766	2.04354e-07	4.16849e-06	AT5G61430.1	ANAC100, ATNAC5, NAC100; NAC domain containing protein 100	GO:0003677;GO:0006355
Dca53983	13.5119	23.1781	16.7708	9.07834	5.41215	3.5949	-1.56635	3.59407	1.76297e-06	3.18713e-05	AT5G62720.1	Integral membrane HPP family protein	NA
Dca24949	20.3464	20.5945	18.3912	8.66941	6.37596	4.7183	-1.58797	3.73658	5.64972e-10	1.62036e-08	AT5G57180.2	CIA2; chloroplast import apparatus 2	NA
Dca14777	8.7199	12.0319	12.4768	3.68041	2.22417	4.86809	-1.62339	2.90363	5.84212e-08	1.30894e-06	AT2G06025.1	Acyl-CoA N-acyltransferases (NAT) superfamily protein	GO:0008080
Dca638	4.71346	3.98604	4.61805	1.96288	1.26036	1.04851	-1.64249	1.62141	1.73923e-07	3.6056e-06	AT4G34280.1	transducin family protein / WD-40 repeat family protein	NA
Dca40122	356.023	394.618	342.951	140.673	141.012	65.3073	-1.65612	7.90837	7.04047e-09	1.78444e-07	AT5G54270.1	LHCB3, LHCB3*1; light-harvesting chlorophyll B-binding protein 3	GO:0009765
Dca28694	12.962	17.9372	13.8541	6.54295	5.18973	2.47149	-1.65775	3.31868	1.37478e-07	2.87742e-06	AT1G49010.1	Duplicated homeodomain-like superfamily protein	GO:0005634;GO:0003677;GO:0006355
Dca26158	34.8796	29.8215	35.243	12.5952	10.0829	8.98724	-1.65878	4.46445	1.34189e-14	5.9867e-13	AT5G38510.1	Rhomboid-related intramembrane serine protease family protein	GO:0016021;GO:0004252;GO:0006508
Dca42908	4.00644	5.09327	4.78008	1.39038	1.7052	1.1983	-1.68547	1.66985	2.33105e-08	5.49723e-07	AT4G03520.1	ATHM2; Thioredoxin superfamily protein	GO:0009055;GO:0015035;GO:0045454;GO:0006662
Dca27977	60.0966	73.1512	54.6064	20.2831	25.059	12.1328	-1.70841	5.35909	7.24134e-12	2.48848e-10	AT3G02380.1	COL2, ATCOL2; CONSTANS-like 2	GO:0005622;GO:0008270
Dca3717	7.07019	5.31472	11.2615	3.43505	1.03795	2.69617	-1.72181	2.3972	1.44339e-05	0.000228933	Os01t0719600-01	Heavy metal transport/detoxification protein domain containing protein	GO:0046872;GO:0030001
Dca45998	12.962	12.8439	10.3703	3.27147	2.89142	4.64341	-1.73998	2.99716	4.57666e-11	1.45481e-09	AT2G34620.1	Mitochondrial transcription termination factor family protein	NA
Dca26686	75.6511	83.1901	74.1318	26.2536	26.0228	16.8511	-1.7531	5.6582	1.95918e-17	1.09902e-15	Os01t0600900-02	Chlorophyll a-b binding protein 2, chloroplast precursor (LHCII type I CAB-2) (LHCP).	GO:0009765
Dca26271	5.49904	4.65038	4.69906	1.63574	1.7052	1.04851	-1.7537	1.74647	1.0578e-08	2.62866e-07	AT4G21445.1	unknown protein; FUNCTIONS IN: molecular_function unknown; INVOLVED IN: biological_process unknown; LOCATED IN: chloroplast, chloroplast stroma	NA
Dca5483	9.81971	9.44838	9.7222	3.27147	3.33626	1.94723	-1.75952	2.67923	8.6429e-11	2.66632e-09	AT3G56290.1	unknown protein	GO:0005634;GO:0003677;GO:0008270;GO:0045893
Dca18635	6.91308	6.93866	6.07638	2.61718	1.92761	1.34809	-1.76065	2.15459	2.17915e-09	5.81286e-08	AT2G41120.1	unknown protein; INVOLVED IN: biological_process unknown; LOCATED IN: chloroplast; EXPRESSED IN: 19 plant structures; EXPRESSED DURING: 10 growth stages; CONTAINS InterPro DOMAIN/s: Protein of unknown function DUF309 (InterPro:IPR005500)	NA
Dca57090	6.1275	10.9985	7.61572	3.18969	1.48278	2.17192	-1.85797	2.43799	2.92525e-08	6.80388e-07	AT2G40130.2	Double Clp-N motif-containing P-loop nucleoside triphosphate hydrolases superfamily protein	GO:0005524
Dca59886	25.6098	25.8354	20.7407	9.16013	4.52248	5.09277	-1.94602	3.93614	3.10476e-12	1.10737e-10	AT1G16560.1	Per1-like family protein	NA
Dca20405	45.4064	53.7377	45.9374	12.9223	14.6054	9.81107	-1.95764	4.93336	2.55564e-19	1.71026e-17	AT4G34530.1	CIB1; cryptochrome-interacting basic-helix-loop-helix 1	NA
Dca61154	3.06375	3.17407	3.64583	1.2268	0.518973	0.748937	-1.9881	1.14365	2.05534e-08	4.91542e-07	Os07t0264800-01	Acyl-CoA N-acyltransferase domain containing protein	GO:0008080
Dca51871	2.98519	6.05287	6.48147	1.14502	0.74139	0.748937	-2.5532	1.66658	3.42054e-11	1.10107e-09	AT1G10657.1	Plant protein 1589 of unknown function	NA
Dca53633	10.5267	21.2589	17.743	5.39793	2.15003	0.449362	-2.63286	3.28322	1.29961e-06	2.37478e-05	AT3G29240.1	Protein of unknown function (DUF179)	NA
Dca43883	3.77077	1.40249	3.15972	0.899655	0.148278	0.224681	-2.71306	0.797841	5.54147e-08	1.24708e-06	AT5G19473.1	RPM1-interacting protein 4 (RIN4) family protein	NA
Dca58854	38.2576	53.9591	47.0717	9.81442	4.59662	4.79319	-2.86159	4.73134	2.49784e-22	2.10564e-20	AT5G49740.1	ATFRO7, FRO7; ferric reduction oxidase 7	GO:0016021;GO:0009055;GO:0050660;GO:0005506;GO:0016491
Dca11914	12.255	21.2589	20.3356	3.51683	2.44659	1.34809	-2.8825	3.37036	1.68592e-17	9.63437e-16	Os09t0518266-00	Hypothetical protein	GO:0016758
Dca11914	12.255	21.2589	20.3356	3.51683	2.44659	1.34809	-2.8825	3.37036	1.68592e-17	9.63437e-16	AT4G15550.1	IAGLU; indole-3-acetate beta-D-glucosyltransferase	GO:0016758

## Sheet: README
Supplementary File. Statistical summary of differentially expressed genes
column	discription
1, 12–14	Carnation gene ID, BLASTp hit against Arabidopsis and rice, annotation, and GO terms downloaded from Carnation DB (Yagi et al. 2014; http://carnation.kazusa.or.jp)
2–7	TPM values of touched and untouched samples, three replicates each
8–11	differentially expression analysis results including log2FC, log2CPM, p-value, and FDR.
